# Supplementary material for: Preparation of quercetin–nicotinamide cocrystals and their evaluation under in vivo and in vitro conditions
Source: Royal Society of Chemistry journal article supplement (doi:10.1039/d0ra03324c), 2020-01-01
Supplement: d0ra03324c3.xlsx [file d0ra03324c3.xlsx]

## Sheet: Sheet1
Wave number	Quercetin	cocrystal(1:1)	cocrystal(1:2)	nicotinamide	physical mixture	Wave number	Quercetin	cocrystal(1:1)	cocrystal(1:2)	nicotinamide	physical mixture
4100.38	75.4707	48.4302	73.7332	63.8339	60.2329	4100.38	75.4707	98.4302	173.733	213.834	260.233
4098.45	75.4741	48.4439	73.7017	63.8039	60.2134	4098.45	75.4741	98.4439	173.702	213.804	260.213
4096.52	75.4676	48.4476	73.6719	63.757	60.2055	4096.52	75.4676	98.4476	173.672	213.757	260.206
4094.59	75.4637	48.4537	73.6595	63.7043	60.1997	4094.59	75.4637	98.4537	173.659	213.704	260.2
4092.67	75.462	48.4423	73.6437	63.6165	60.1803	4092.67	75.462	98.4423	173.644	213.616	260.18
4090.74	75.4671	48.452	73.6338	63.5291	60.1616	4090.74	75.4671	98.452	173.634	213.529	260.162
4088.81	75.4621	48.4325	73.5899	63.4326	60.1096	4088.81	75.4621	98.4325	173.59	213.433	260.11
4086.88	75.4809	48.4269	73.5862	63.4632	60.1264	4086.88	75.4809	98.4269	173.586	213.463	260.126
4084.95	75.5031	48.4623	73.646	63.6334	60.2223	4084.95	75.5031	98.4623	173.646	213.633	260.222
4083.02	75.5053	48.4967	73.6738	63.7837	60.2625	4083.02	75.5053	98.4967	173.674	213.784	260.262
4081.09	75.4909	48.4951	73.6295	63.8496	60.2381	4081.09	75.4909	98.4951	173.629	213.85	260.238
4079.16	75.4865	48.4846	73.6094	63.8874	60.2295	4079.16	75.4865	98.4846	173.609	213.887	260.23
4077.24	75.504	48.5096	73.6804	63.9748	60.3075	4077.24	75.504	98.5096	173.68	213.975	260.308
4075.31	75.5058	48.5532	73.7228	64.0593	60.351	4075.31	75.5058	98.5532	173.723	214.059	260.351
4073.38	75.5009	48.562	73.7371	64.112	60.3908	4073.38	75.5009	98.562	173.737	214.112	260.391
4071.45	75.525	48.5928	73.7694	64.1785	60.4454	4071.45	75.525	98.5928	173.769	214.179	260.445
4069.52	75.5353	48.6224	73.7925	64.2283	60.4749	4069.52	75.5353	98.6224	173.792	214.228	260.475
4067.59	75.5473	48.6485	73.8141	64.2653	60.5118	4067.59	75.5473	98.6485	173.814	214.265	260.512
4065.66	75.5529	48.6619	73.8226	64.2743	60.5268	4065.66	75.5529	98.6619	173.823	214.274	260.527
4063.74	75.5589	48.672	73.8228	64.2794	60.528	4063.74	75.5589	98.672	173.823	214.279	260.528
4061.81	75.5586	48.6675	73.8001	64.2566	60.5031	4061.81	75.5586	98.6675	173.8	214.257	260.503
4059.88	75.5679	48.6781	73.7884	64.2546	60.5039	4059.88	75.5679	98.6781	173.788	214.255	260.504
4057.95	75.6028	48.7189	73.8417	64.3188	60.5771	4057.95	75.6028	98.7189	173.842	214.319	260.577
4056.02	75.6238	48.7545	73.8696	64.359	60.6022	4056.02	75.6238	98.7545	173.87	214.359	260.602
4054.09	75.6346	48.7634	73.8866	64.3866	60.6351	4054.09	75.6346	98.7634	173.887	214.387	260.635
4052.16	75.6619	48.7884	73.912	64.4305	60.6645	4052.16	75.6619	98.7884	173.912	214.43	260.664
4050.23	75.6747	48.8035	73.9384	64.4618	60.6798	4050.23	75.6747	98.8035	173.938	214.462	260.68
4048.31	75.6659	48.8235	73.9422	64.4819	60.6847	4048.31	75.6659	98.8235	173.942	214.482	260.685
4046.38	75.6181	48.8083	73.8411	64.4149	60.5975	4046.38	75.6181	98.8083	173.841	214.415	260.597
4044.45	75.5714	48.7551	73.7285	64.3224	60.5049	4044.45	75.5714	98.7551	173.728	214.322	260.505
4042.52	75.6235	48.7899	73.8414	64.4242	60.6449	4042.52	75.6235	98.7899	173.841	214.424	260.645
4040.59	75.6709	48.8829	73.9329	64.5651	60.7474	4040.59	75.6709	98.8829	173.933	214.565	260.747
4038.66	75.6718	48.9008	73.9192	64.6112	60.7609	4038.66	75.6718	98.9008	173.919	214.611	260.761
4036.73	75.6704	48.9158	73.907	64.628	60.7742	4036.73	75.6704	98.9158	173.907	214.628	260.774
4034.81	75.6672	48.9217	73.894	64.622	60.7749	4034.81	75.6672	98.9217	173.894	214.622	260.775
4032.88	75.6823	48.9368	73.896	64.6369	60.7904	4032.88	75.6823	98.9368	173.896	214.637	260.79
4030.95	75.6911	48.9377	73.9082	64.6349	60.8167	4030.95	75.6911	98.9377	173.908	214.635	260.817
4029.02	75.6912	48.9542	73.9213	64.6317	60.836	4029.02	75.6912	98.9542	173.921	214.632	260.836
4027.09	75.6816	48.9592	73.8845	64.595	60.8103	4027.09	75.6816	98.9592	173.885	214.595	260.81
4025.16	75.6592	48.9299	73.8261	64.5444	60.7597	4025.16	75.6592	98.9299	173.826	214.544	260.76
4023.23	75.6816	48.9426	73.8967	64.615	60.8362	4023.23	75.6816	98.9426	173.897	214.615	260.836
4021.3	75.6877	48.9986	73.9022	64.668	60.8302	4021.3	75.6877	98.9986	173.902	214.668	260.83
4019.38	75.6697	48.9626	73.8206	64.622	60.7588	4019.38	75.6697	98.9626	173.821	214.622	260.759
4017.45	75.6851	48.9684	73.837	64.6428	60.7912	4017.45	75.6851	98.9684	173.837	214.643	260.791
4015.52	75.7013	49.0096	73.8748	64.7069	60.8441	4015.52	75.7013	99.0096	173.875	214.707	260.844
4013.59	75.7129	49.0409	73.8819	64.7558	60.8652	4013.59	75.7129	99.0409	173.882	214.756	260.865
4011.66	75.719	49.0439	73.8974	64.7795	60.8941	4011.66	75.719	99.0439	173.897	214.78	260.894
4009.73	75.6886	49.0324	73.8141	64.7328	60.8217	4009.73	75.6886	99.0324	173.814	214.733	260.822
4007.8	75.684	48.9734	73.7769	64.6946	60.8147	4007.8	75.684	98.9734	173.777	214.695	260.815
4005.88	75.7477	49.028	73.9074	64.8228	60.9745	4005.88	75.7477	99.028	173.907	214.823	260.975
4003.95	75.7561	49.0844	73.9177	64.8782	61.0002	4003.95	75.7561	99.0844	173.918	214.878	261
4002.02	75.7655	49.1066	73.9097	64.8988	61.0105	4002.02	75.7655	99.1066	173.91	214.899	261.011
4000.09	75.7976	49.1365	73.9505	64.9455	61.0564	4000.09	75.7976	99.1365	173.951	214.945	261.056
3998.16	75.8144	49.1699	73.9548	64.9576	61.0652	3998.16	75.8144	99.1699	173.955	214.958	261.065
3996.23	75.7677	49.1321	73.835	64.8349	60.9487	3996.23	75.7677	99.1321	173.835	214.835	260.949
3994.3	75.7433	49.0727	73.7626	64.7135	60.8685	3994.3	75.7433	99.0727	173.763	214.714	260.868
3992.37	75.7501	49.0792	73.7694	64.6911	60.8774	3992.37	75.7501	99.0792	173.769	214.691	260.877
3990.45	75.7181	49.0499	73.6656	64.5945	60.7528	3990.45	75.7181	99.0499	173.666	214.595	260.753
3988.52	75.7837	49.0758	73.8128	64.7524	60.9267	3988.52	75.7837	99.0758	173.813	214.752	260.927
3986.59	75.8437	49.1954	73.9793	65.0032	61.1108	3986.59	75.8437	99.1954	173.979	215.003	261.111
3984.66	75.8497	49.2098	73.9624	65.0626	61.1052	3984.66	75.8497	99.2098	173.962	215.063	261.105
3982.73	75.8349	49.2029	73.8891	65.0408	61.0544	3982.73	75.8349	99.2029	173.889	215.041	261.054
3980.8	75.8233	49.1803	73.8767	65.024	61.0616	3980.8	75.8233	99.1803	173.877	215.024	261.062
3978.87	75.8464	49.2255	73.9189	65.0876	61.1249	3978.87	75.8464	99.2255	173.919	215.088	261.125
3976.94	75.7752	49.1776	73.7379	64.9091	60.9418	3976.94	75.7752	99.1776	173.738	214.909	260.942
3975.02	75.7015	49.0685	73.5348	64.6621	60.7426	3975.02	75.7015	99.0685	173.535	214.662	260.743
3973.09	75.766	49.0581	73.6208	64.7213	60.8679	3973.09	75.766	99.0581	173.621	214.721	260.868
3971.16	75.8136	49.1318	73.7294	64.8485	60.9723	3971.16	75.8136	99.1318	173.729	214.849	260.972
3969.23	75.822	49.1572	73.7654	64.8815	60.9939	3969.23	75.822	99.1572	173.765	214.881	260.994
3967.3	75.8866	49.2284	73.8993	65.0395	61.1485	3967.3	75.8866	99.2284	173.899	215.04	261.149
3965.37	75.9282	49.317	73.9842	65.1954	61.2472	3965.37	75.9282	99.317	173.984	215.195	261.247
3963.44	75.7849	49.2403	73.6656	64.9161	60.8954	3963.44	75.7849	99.2403	173.666	214.916	260.895
3961.52	75.6968	49.0452	73.417	64.5865	60.6345	3961.52	75.6968	99.0452	173.417	214.587	260.634
3959.59	75.8087	49.1144	73.6449	64.7937	60.8912	3959.59	75.8087	99.1144	173.645	214.794	260.891
3957.66	75.843	49.2183	73.7501	64.9594	60.9864	3957.66	75.843	99.2183	173.75	214.959	260.986
3955.73	75.8655	49.2439	73.7668	65.0112	61.0217	3955.73	75.8655	99.2439	173.767	215.011	261.022
3953.8	75.9071	49.3091	73.8357	65.1232	61.1404	3953.8	75.9071	99.3091	173.836	215.123	261.14
3951.87	75.7744	49.2331	73.5156	64.8298	60.8001	3951.87	75.7744	99.2331	173.516	214.83	260.8
3949.94	75.5064	48.89	72.8359	64.0298	60.0593	3949.94	75.5064	98.89	172.836	214.03	260.059
3948.01	75.4658	48.6135	72.6531	63.6007	59.853	3948.01	75.4658	98.6135	172.653	213.601	259.853
3946.09	75.7544	48.8957	73.2871	64.2083	60.5731	3946.09	75.7544	98.8957	173.287	214.208	260.573
3944.16	75.5944	49.0348	72.9453	64.1165	60.1997	3944.16	75.5944	99.0348	172.945	214.117	260.2
3942.23	75.4465	48.6403	72.5715	63.6479	59.8263	3942.23	75.4465	98.6403	172.571	213.648	259.826
3940.3	75.917	49.0045	73.5988	64.5973	60.9831	3940.3	75.917	99.0045	173.599	214.597	260.983
3938.37	76.0717	49.4599	73.9671	65.2564	61.3328	3938.37	76.0717	99.4599	173.967	215.256	261.333
3936.44	76.0406	49.5064	73.9182	65.3565	61.2766	3936.44	76.0406	99.5064	173.918	215.357	261.277
3934.51	75.7831	49.4183	73.3471	64.8588	60.6609	3934.51	75.7831	99.4183	173.347	214.859	260.661
3932.59	75.3374	48.7809	72.2343	63.5771	59.4509	3932.59	75.3374	98.7809	172.234	213.577	259.451
3930.66	75.5115	48.512	72.4966	63.4769	59.7915	3930.66	75.5115	98.512	172.497	213.477	259.791
3928.73	75.9391	49.0067	73.4525	64.5134	60.8249	3928.73	75.9391	99.0067	173.452	214.513	260.825
3926.8	75.904	49.3762	73.4413	64.7973	60.7859	3926.8	75.904	99.3762	173.441	214.797	260.786
3924.87	75.4964	48.9208	72.4718	63.8166	59.7066	3924.87	75.4964	98.9208	172.472	213.817	259.707
3922.94	75.7246	48.8054	72.9175	63.9633	60.263	3922.94	75.7246	98.8054	172.917	213.963	260.263
3921.01	75.8183	49.2394	73.1785	64.4656	60.5449	3921.01	75.8183	99.2394	173.179	214.466	260.545
3919.08	75.5565	49.0175	72.5748	63.9448	59.8927	3919.08	75.5565	99.0175	172.575	213.945	259.893
3917.16	75.4696	48.7029	72.3198	63.4891	59.6156	3917.16	75.4696	98.7029	172.32	213.489	259.616
3915.23	75.954	48.8779	73.3215	64.2998	60.7382	3915.23	75.954	98.8779	173.321	214.3	260.738
3913.3	76.3645	49.6826	74.3032	65.5888	61.7918	3913.3	76.3645	99.6826	174.303	215.589	261.792
3911.37	76.3206	49.8884	74.2768	65.8834	61.7195	3911.37	76.3206	99.8884	174.277	215.883	261.72
3909.44	76.3057	49.9211	74.2582	65.9228	61.7074	3909.44	76.3057	99.9211	174.258	215.923	261.707
3907.51	75.9449	49.7449	73.4337	65.1786	60.8198	3907.51	75.9449	99.7449	173.434	215.179	260.82
3905.58	75.0673	48.9204	71.4168	63.1379	58.676	3905.58	75.0673	98.9204	171.417	213.138	258.676
3903.65	74.5645	47.7004	70.1189	61.31	57.3873	3903.65	74.5645	97.7004	170.119	211.31	257.387
3901.73	74.8863	47.5468	70.6372	61.2843	58.0047	3901.73	74.8863	97.5468	170.637	211.284	258.005
3899.8	75.2261	47.8319	71.249	61.8521	58.5868	3899.8	75.2261	97.8319	171.249	211.852	258.587
3897.87	75.9824	48.4224	72.8338	63.3866	60.256	3897.87	75.9824	98.4224	172.834	213.387	260.256
3895.94	76.4508	49.4783	74.0112	64.9538	61.4664	3895.94	76.4508	99.4783	174.011	214.954	261.466
3894.01	75.9907	49.7312	73.146	64.6648	60.4947	3894.01	75.9907	99.7312	173.146	214.665	260.495
3892.08	75.3463	48.982	71.7275	63.313	59.0249	3892.08	75.3463	98.982	171.727	213.313	259.025
3890.15	75.897	48.6338	72.7578	63.7656	60.2343	3890.15	75.897	98.6338	172.758	213.766	260.234
3888.23	76.3546	49.6134	73.8043	64.9627	61.3482	3888.23	76.3546	99.6134	173.804	214.963	261.348
3886.3	75.4453	49.3322	71.8564	63.6493	59.1529	3886.3	75.4453	99.3322	171.856	213.649	259.153
3884.37	75.6642	48.3047	72.0236	63.006	59.4861	3884.37	75.6642	98.3047	172.024	213.006	259.486
3882.44	75.8864	48.9984	72.5194	63.5155	59.9809	3882.44	75.8864	98.9984	172.519	213.516	259.981
3880.51	75.3384	48.5101	71.3368	62.6316	58.6554	3880.51	75.3384	98.5101	171.337	212.632	258.655
3878.58	76.2243	48.7503	73.206	64.0554	60.7623	3878.58	76.2243	98.7503	173.206	214.055	260.762
3876.65	76.559	49.9607	74.0556	65.3805	61.5993	3876.65	76.559	99.9607	174.056	215.38	261.599
3874.72	75.6876	49.4889	72.1779	63.9962	59.5162	3874.72	75.6876	99.4889	172.178	213.996	259.516
3872.8	75.5831	48.6707	71.778	63.0392	59.236	3872.8	75.5831	98.6707	171.778	213.039	259.236
3870.87	75.1559	48.7002	70.8571	62.2462	58.2011	3870.87	75.1559	98.7002	170.857	212.246	258.201
3868.94	75.4229	47.7872	71.2116	62.0481	58.6377	3868.94	75.4229	97.7872	171.212	212.048	258.638
3867.01	76.2988	49.0579	73.1366	63.8769	60.7348	3867.01	76.2988	99.0579	173.137	213.877	260.735
3865.08	75.5923	49.0096	71.6181	63.029	58.9551	3865.08	75.5923	99.0096	171.618	213.029	258.955
3863.15	75.7412	48.4409	71.7834	62.7436	59.2667	3863.15	75.7412	98.4409	171.783	212.744	259.267
3861.22	76.364	49.0797	73.1344	64.0563	60.6856	3861.22	76.364	99.0797	173.134	214.056	260.686
3859.3	76.6133	49.7602	73.7757	65.0207	61.3466	3859.3	76.6133	99.7602	173.776	215.021	261.347
3857.37	75.9821	49.7409	72.4892	64.191	59.9413	3857.37	75.9821	99.7409	172.489	214.191	259.941
3855.44	74.7794	49.1386	70.099	62.2962	57.5116	3855.44	74.7794	99.1386	170.099	212.296	257.512
3853.51	73.846	47.1322	67.9443	59.7418	55.3449	3853.51	73.846	97.1322	167.944	209.742	255.345
3851.58	76.0123	46.7854	71.747	61.463	59.5154	3851.58	76.0123	96.7854	171.747	211.463	259.515
3849.65	77.1357	49.0929	74.2824	64.5026	61.9597	3849.65	77.1357	99.0929	174.282	214.503	261.96
3847.72	77.0487	50.1725	74.4753	65.6987	62.0312	3847.72	77.0487	100.173	174.475	215.699	262.031
3845.79	76.6242	50.4115	73.7647	65.5822	61.267	3845.79	76.6242	100.412	173.765	215.582	261.267
3843.87	76.052	49.7044	72.4567	64.3115	59.9164	3843.87	76.052	99.7044	172.457	214.312	259.916
3841.94	75.8196	49.0648	71.818	63.3263	59.3501	3841.94	75.8196	99.0648	171.818	213.326	259.35
3840.01	75.3335	48.5637	70.6593	62.0849	58.1513	3840.01	75.3335	98.5637	170.659	212.085	258.151
3838.08	75.2971	48.0175	70.4348	61.6375	57.998	3838.08	75.2971	98.0175	170.435	211.637	257.998
3836.15	76.2262	48.394	72.1908	63.0039	59.9092	3836.15	76.2262	98.394	172.191	213.004	259.909
3834.22	76.6719	49.2693	73.1953	64.216	60.9001	3834.22	76.6719	99.2693	173.195	214.216	260.9
3832.29	76.5793	49.6356	73.1685	64.5909	60.8268	3832.29	76.5793	99.6356	173.168	214.591	260.827
3830.36	76.8098	49.7226	73.6959	65.1012	61.4168	3830.36	76.8098	99.7226	173.696	215.101	261.417
3828.44	76.8554	50.1527	73.847	65.4275	61.5443	3828.44	76.8554	100.153	173.847	215.427	261.544
3826.51	76.5032	49.8312	73.0823	64.8325	60.6853	3826.51	76.5032	99.8312	173.082	214.833	260.685
3824.58	76.642	49.8349	73.3612	64.9281	61.0759	3824.58	76.642	99.8349	173.361	214.928	261.076
3822.65	75.7938	49.8173	71.6278	63.7454	59.2042	3822.65	75.7938	99.8173	171.628	213.745	259.204
3820.72	75.3383	48.0507	70.3097	61.9039	57.9319	3820.72	75.3383	98.0507	170.31	211.904	257.932
3818.79	76.6312	48.717	72.835	63.5571	60.7275	3818.79	76.6312	98.717	172.835	213.557	260.727
3816.86	76.3195	49.694	72.3529	63.9847	59.9966	3816.86	76.3195	99.694	172.353	213.985	259.997
3814.94	76.6785	49.1263	73.0177	64.3528	60.7691	3814.94	76.6785	99.1263	173.018	214.353	260.769
3813.01	77.6282	50.3281	75.1499	66.3351	63.043	3813.01	77.6282	100.328	175.15	216.335	263.043
3811.08	77.4006	50.97	74.8787	66.7628	62.6299	3811.08	77.4006	100.97	174.879	216.763	262.63
3809.15	76.8358	50.8993	73.8181	66.1061	61.551	3809.15	76.8358	100.899	173.818	216.106	261.551
3807.22	76.1818	49.9674	72.3545	64.6998	60.0162	3807.22	76.1818	99.9674	172.354	214.7	260.016
3805.29	76.8674	49.4963	73.4952	64.94	61.4138	3805.29	76.8674	99.4963	173.495	214.94	261.414
3803.36	76.498	50.1428	72.7074	64.5887	60.5105	3803.36	76.498	100.143	172.707	214.589	260.51
3801.43	75.6598	48.8237	70.7926	62.7388	58.4776	3801.43	75.6598	98.8237	170.793	212.739	258.478
3799.51	76.8921	48.9445	73.2068	64.0891	61.1906	3799.51	76.8921	98.9445	173.207	214.089	261.191
3797.58	76.9619	50.052	73.4516	64.8518	61.2608	3797.58	76.9619	100.052	173.452	214.852	261.261
3795.65	76.92	49.9057	73.4563	65.0776	61.2616	3795.65	76.92	99.9057	173.456	215.078	261.262
3793.72	77.5549	50.6318	74.9367	66.5359	62.8827	3793.72	77.5549	100.632	174.937	216.536	262.883
3791.79	77.5432	51.1369	75.024	67.0513	62.8782	3791.79	77.5432	101.137	175.024	217.051	262.878
3789.86	77.4557	51.1049	74.8771	67.0342	62.7419	3789.86	77.4557	101.105	174.877	217.034	262.742
3787.93	77.3412	51.0317	74.6351	66.8225	62.4972	3787.93	77.3412	101.032	174.635	216.823	262.497
3786.01	77.0696	50.754	74.0227	66.1648	61.862	3786.01	77.0696	100.754	174.023	216.165	261.862
3784.08	77.0476	50.4158	73.8904	65.8636	61.7658	3784.08	77.0476	100.416	173.89	215.864	261.766
3782.15	77.2599	50.7467	74.36	66.3304	62.314	3782.15	77.2599	100.747	174.36	216.33	262.314
3780.22	76.8376	50.5997	73.4163	65.6919	61.2538	3780.22	76.8376	100.6	173.416	215.692	261.254
3778.29	77.113	50.1086	73.7858	65.6741	61.7544	3778.29	77.113	100.109	173.786	215.674	261.754
3776.36	77.6798	50.8523	75.0406	66.8943	63.1016	3776.36	77.6798	100.852	175.041	216.894	263.102
3774.43	77.6165	51.246	75.0324	67.2252	63.0304	3774.43	77.6165	101.246	175.032	217.225	263.03
3772.5	77.2458	51.174	74.2907	66.7003	62.252	3772.5	77.2458	101.174	174.291	216.7	262.252
3770.58	76.6599	50.4895	72.944	65.3726	60.817	3770.58	76.6599	100.489	172.944	215.373	260.817
3768.65	76.9322	49.8922	73.3073	65.157	61.3028	3768.65	76.9322	99.8922	173.307	215.157	261.303
3766.72	77.1626	50.3841	73.7556	65.5578	61.755	3766.72	77.1626	100.384	173.756	215.558	261.755
3764.79	77.0808	50.2371	73.5793	65.4618	61.5084	3764.79	77.0808	100.237	173.579	215.462	261.508
3762.86	77.4646	50.7631	74.4924	66.3592	62.556	3762.86	77.4646	100.763	174.492	216.359	262.556
3760.93	76.8736	50.8201	73.3008	65.6952	61.1914	3760.93	76.8736	100.82	173.301	215.695	261.191
3759	76.5228	49.7836	72.3136	64.3543	60.2468	3759	76.5228	99.7836	172.314	214.354	260.247
3757.07	76.8847	49.7913	72.9678	64.6631	61.0106	3757.07	76.8847	99.7913	172.968	214.663	261.011
3755.15	76.9389	50.2843	73.1574	65.0776	61.2364	3755.15	76.9389	100.284	173.157	215.078	261.236
3753.22	75.8967	49.9971	71.047	63.5475	58.9359	3753.22	75.8967	99.9971	171.047	213.548	258.936
3751.29	75.0674	48.2651	69.0703	61.1386	57.0102	3751.29	75.0674	98.2651	169.07	211.139	257.01
3749.36	75.9075	47.8307	70.5153	61.5993	58.676	3749.36	75.9075	97.8307	170.515	211.599	258.676
3747.43	76.6294	48.9164	72.0658	63.1211	60.3156	3747.43	76.6294	98.9164	172.066	213.121	260.316
3745.5	75.4036	49.2847	69.9647	62.1097	57.8925	3745.5	75.4036	99.2847	169.965	212.11	257.892
3743.57	75.5983	47.7216	70.438	61.8853	58.6203	3743.57	75.5983	97.7216	170.438	211.885	258.62
3741.65	76.9829	49.0746	73.3753	64.3704	61.8806	3741.65	76.9829	99.0746	173.375	214.37	261.881
3739.72	76.4069	49.7325	72.5897	64.6109	60.9378	3739.72	76.4069	99.7325	172.59	214.611	260.938
3737.79	75.2573	49.1457	70.6129	63.2054	58.9468	3737.79	75.2573	99.1457	170.613	213.205	258.947
3735.86	73.8634	47.1906	67.9062	60.2411	56.1787	3735.86	73.8634	97.1906	167.906	210.241	256.179
3733.93	74.4036	46.5427	69.0682	60.485	57.723	3733.93	74.4036	96.5427	169.068	210.485	257.723
3732	75.5791	47.9574	71.8147	63.5822	60.6636	3732	75.5791	97.9574	171.815	213.582	260.664
3730.07	76.2158	49.0155	73.709	65.9079	62.7464	3730.07	76.2158	99.0155	173.709	215.908	262.746
3728.14	75.6941	49.5529	73.0869	65.9569	62.0043	3728.14	75.6941	99.5529	173.087	215.957	262.004
3726.22	74.9157	48.6602	71.4712	64.3616	60.2479	3726.22	74.9157	98.6602	171.471	214.362	260.248
3724.29	75.1235	48.4547	71.6592	64.1323	60.5171	3724.29	75.1235	98.4547	171.659	214.132	260.517
3722.36	75.4358	48.7182	71.977	64.4289	60.7869	3722.36	75.4358	98.7182	171.977	214.429	260.787
3720.43	76.069	49.2366	72.9411	65.338	61.7725	3720.43	76.069	99.2366	172.941	215.338	261.772
3718.5	76.5984	49.9712	73.6337	66.1056	62.3558	3718.5	76.5984	99.9712	173.634	216.106	262.356
3716.57	76.9878	50.5482	74.037	66.5595	62.6543	3716.57	76.9878	100.548	174.037	216.559	262.654
3714.64	76.6352	50.7593	73.0483	65.7877	61.4848	3714.64	76.6352	100.759	173.048	215.788	261.485
3712.72	75.538	49.688	70.8124	63.7047	59.1599	3712.72	75.538	99.688	170.812	213.705	259.16
3710.79	75.338	48.2661	70.5656	62.8039	59.2224	3710.79	75.338	98.2661	170.566	212.804	259.222
3708.86	76.2634	48.8518	72.8471	64.8569	61.8468	3708.86	76.2634	98.8518	172.847	214.857	261.847
3706.93	76.758	50.0127	74.2508	66.7853	63.3008	3706.93	76.758	100.013	174.251	216.785	263.301
3705	76.5613	50.5678	74.1709	67.3115	63.1876	3705	76.5613	100.568	174.171	217.312	263.188
3703.07	75.9709	50.315	73.0537	66.5415	61.9905	3703.07	75.9709	100.315	173.054	216.542	261.991
3701.14	75.9441	49.6651	72.8144	65.9563	61.7831	3701.14	75.9441	99.6651	172.814	215.956	261.783
3699.21	76.5753	50.1094	74.1513	67.0796	63.3079	3699.21	76.5753	100.109	174.151	217.08	263.308
3697.29	76.5701	50.6414	74.2067	67.5359	63.2942	3697.29	76.5701	100.641	174.207	217.536	263.294
3695.36	76.4643	50.5515	73.8761	67.3238	62.9556	3695.36	76.4643	100.552	173.876	217.324	262.956
3693.43	76.1938	50.5783	73.2383	66.8133	62.2881	3693.43	76.1938	100.578	173.238	216.813	262.288
3691.5	75.4007	49.7831	71.3482	64.9579	60.2445	3691.5	75.4007	99.7831	171.348	214.958	260.244
3689.57	75.2011	48.8387	70.3473	63.4375	59.211	3689.57	75.2011	98.8387	170.347	213.438	259.211
3687.64	76.2853	48.9611	72.2284	64.6727	61.2429	3687.64	76.2853	98.9611	172.228	214.673	261.243
3685.71	77.1641	50.3492	74.338	66.9186	63.467	3685.71	77.1641	100.349	174.338	216.919	263.467
3683.78	76.9781	51.138	74.2445	67.5109	63.1952	3683.78	76.9781	101.138	174.245	217.511	263.195
3681.86	76.662	51.1795	73.73	67.2715	62.6459	3681.86	76.662	101.18	173.73	217.271	262.646
3679.93	76.1186	50.699	72.5591	66.1651	61.3893	3679.93	76.1186	100.699	172.559	216.165	261.389
3678	75.4681	50.0584	71.1458	64.6515	59.9615	3678	75.4681	100.058	171.146	214.652	259.961
3676.07	74.2632	48.7846	68.5401	62.0736	57.1271	3676.07	74.2632	98.7846	168.54	212.074	257.127
3674.14	75.2654	47.8214	70.4255	62.6359	59.417	3674.14	75.2654	97.8214	170.425	212.636	259.417
3672.21	75.9174	49.907	72.1225	64.8069	61.1479	3672.21	75.9174	99.907	172.123	214.807	261.148
3670.28	74.758	49.3309	69.8847	63.2898	58.5692	3670.28	74.758	99.3309	169.885	213.29	258.569
3668.36	75.4811	48.9349	71.5543	64.2695	60.6257	3668.36	75.4811	98.9349	171.554	214.27	260.626
3666.43	76.2665	50.5634	73.7192	66.9301	62.9397	3666.43	76.2665	100.563	173.719	216.93	262.94
3664.5	76.0091	51.2236	73.6732	67.6721	62.8209	3664.5	76.0091	101.224	173.673	217.672	262.821
3662.57	75.6253	51.1455	73.3132	67.652	62.4846	3662.57	75.6253	101.146	173.313	217.652	262.485
3660.64	75.3422	50.9716	73.0486	67.5059	62.2669	3660.64	75.3422	100.972	173.049	217.506	262.267
3658.71	74.8518	50.7922	72.3632	67.0264	61.5998	3658.71	74.8518	100.792	172.363	217.026	261.6
3656.78	74.0348	50.0662	70.9806	65.7267	60.1438	3656.78	74.0348	100.066	170.981	215.727	260.144
3654.85	74.0785	49.4933	71.5015	65.7442	60.9002	3654.85	74.0785	99.4933	171.502	215.744	260.9
3652.93	73.7688	50.1256	71.2765	65.8596	60.6597	3652.93	73.7688	100.126	171.277	215.86	260.66
3651	71.9243	48.7519	67.5907	62.6065	56.5756	3651	71.9243	98.7519	167.591	212.606	256.576
3649.07	71.0118	46.4469	65.8347	59.812	54.9999	3649.07	71.0118	96.4469	165.835	209.812	255
3647.14	71.7202	46.6049	67.9087	61.3043	57.4211	3647.14	71.7202	96.6049	167.909	211.304	257.421
3645.21	72.5691	48.4152	70.704	64.8061	60.5211	3645.21	72.5691	98.4152	170.704	214.806	260.521
3643.28	72.3066	49.5497	71.0832	66.3197	60.8932	3643.28	72.3066	99.5497	171.083	216.32	260.893
3641.35	71.6737	49.3786	70.5603	66.3157	60.4266	3641.35	71.6737	99.3786	170.56	216.316	260.427
3639.43	71.2472	49.27	70.5172	66.5895	60.5698	3639.43	71.2472	99.27	170.517	216.589	260.57
3637.5	70.767	49.0215	70.2926	66.6346	60.4739	3637.5	70.767	99.0215	170.293	216.635	260.474
3635.57	70.1506	48.758	69.7758	66.3751	60.0824	3635.57	70.1506	98.758	169.776	216.375	260.082
3633.64	69.3485	48.0484	68.8295	65.5422	59.2288	3633.64	69.3485	98.0484	168.829	215.542	259.229
3631.71	68.5901	47.71	68.037	64.8973	58.5704	3631.71	68.5901	97.71	168.037	214.897	258.57
3629.78	67.0211	46.5549	65.2113	62.311	55.4626	3629.78	67.0211	96.5549	165.211	212.311	255.463
3627.85	66.7919	44.8773	65.5321	61.7006	56.2692	3627.85	66.7919	94.8773	165.532	211.701	256.269
3625.92	67.7312	46.4924	68.4368	64.9701	59.6444	3625.92	67.7312	96.4924	168.437	214.97	259.644
3624	67.4594	47.428	68.5342	66.1891	59.6806	3624	67.4594	97.428	168.534	216.189	259.681
3622.07	66.7226	47.3041	67.3177	65.4834	58.3511	3622.07	66.7226	97.3041	167.318	215.483	258.351
3620.14	65.7444	46.3189	65.274	63.3476	56.1064	3620.14	65.7444	96.3189	165.274	213.348	256.106
3618.21	65.4096	45.3849	64.9167	62.4363	55.9433	3618.21	65.4096	95.3849	164.917	212.436	255.943
3616.28	65.5355	45.8562	65.8001	63.4701	57.0666	3616.28	65.5355	95.8562	165.8	213.47	257.067
3614.35	65.0111	46.0017	64.9432	63.0536	56.0491	3614.35	65.0111	96.0017	164.943	213.054	256.049
3612.42	64.533	45.526	64.4291	62.6473	55.6341	3612.42	64.533	95.526	164.429	212.647	255.634
3610.49	64.3173	45.7432	64.7513	63.3392	56.1885	3610.49	64.3173	95.7432	164.751	213.339	256.188
3608.57	63.5347	45.2024	63.868	62.803	55.3555	3608.57	63.5347	95.2024	163.868	212.803	255.356
3606.64	63.3146	44.8695	64.3212	63.3727	56.2319	3606.64	63.3146	94.8695	164.321	213.373	256.232
3604.71	63.3716	45.5884	65.2684	65.0741	57.4784	3604.71	63.3716	95.5884	165.268	215.074	257.478
3602.78	62.8738	45.6649	64.7228	65.1604	56.9386	3602.78	62.8738	95.6649	164.723	215.16	256.939
3600.85	62.1579	44.9994	63.6822	64.2818	55.9557	3600.85	62.1579	94.9994	163.682	214.282	255.956
3598.92	61.7941	44.6484	63.4415	64.1011	55.9127	3598.92	61.7941	94.6484	163.442	214.101	255.913
3596.99	61.3394	44.5398	62.9733	63.8989	55.5017	3596.99	61.3394	94.5398	162.973	213.899	255.502
3595.07	60.7272	44.0352	62.1258	63.1344	54.6855	3595.07	60.7272	94.0352	162.126	213.134	254.686
3593.14	60.4981	43.8812	62.2591	63.4533	55.0667	3593.14	60.4981	93.8812	162.259	213.453	255.067
3591.21	60.4004	44.3153	62.5417	64.2524	55.491	3591.21	60.4004	94.3153	162.542	214.252	255.491
3589.28	59.5426	43.9176	60.8568	62.8077	53.5426	3589.28	59.5426	93.9176	160.857	212.808	253.543
3587.35	58.6458	42.4566	59.0676	60.4261	51.6792	3587.35	58.6458	92.4566	159.068	210.426	251.679
3585.42	58.9861	42.7071	60.494	62.0005	53.6673	3585.42	58.9861	92.7071	160.494	212	253.667
3583.49	59.235	43.7794	61.5827	64.1071	54.9947	3583.49	59.235	93.7794	161.583	214.107	254.995
3581.56	58.8581	43.9416	61.1879	64.3807	54.6169	3581.56	58.8581	93.9416	161.188	214.381	254.617
3579.64	58.3747	43.6908	60.6247	64.0821	54.1263	3579.64	58.3747	93.6908	160.625	214.082	254.126
3577.71	57.9514	43.5017	60.3055	64.0667	53.9601	3577.71	57.9514	93.5017	160.306	214.067	253.96
3575.78	57.5418	43.3455	59.9603	64.0644	53.7374	3575.78	57.5418	93.3455	159.96	214.064	253.737
3573.85	57.1412	43.1756	59.6375	64.0691	53.547	3573.85	57.1412	93.1756	159.637	214.069	253.547
3571.92	56.7544	43.0733	59.2516	64.0116	53.2947	3571.92	56.7544	93.0733	159.252	214.012	253.295
3569.99	56.0534	42.6463	57.9521	62.897	51.9736	3569.99	56.0534	92.6463	157.952	212.897	251.974
3568.06	54.8963	41.2502	55.4308	59.9301	49.2571	3568.06	54.8963	91.2502	155.431	209.93	249.257
3566.14	54.2759	40.0323	54.5693	58.5271	48.8004	3566.14	54.2759	90.0323	154.569	208.527	248.8
3564.21	54.6516	40.9382	56.1562	61.0381	51.0989	3564.21	54.6516	90.9382	156.156	211.038	251.099
3562.28	54.6421	41.6937	56.569	62.6762	51.774	3562.28	54.6421	91.6937	156.569	212.676	251.774
3560.35	54.29	41.65	56.1275	62.8601	51.5034	3560.35	54.29	91.65	156.128	212.86	251.503
3558.42	53.9471	41.5855	55.9583	63.2499	51.6588	3558.42	53.9471	91.5855	155.958	213.25	251.659
3556.49	53.6008	41.5864	55.7477	63.6187	51.7207	3556.49	53.6008	91.5864	155.748	213.619	251.721
3554.56	53.0515	41.2918	54.9592	63.1581	51.0416	3554.56	53.0515	91.2918	154.959	213.158	251.042
3552.63	52.4541	40.7533	54.0217	62.318	50.2296	3552.63	52.4541	90.7533	154.022	212.318	250.23
3550.71	52.1211	40.5642	53.8622	62.5693	50.4705	3550.71	52.1211	90.5642	153.862	212.569	250.47
3548.78	51.7285	40.5657	53.3932	62.6105	50.187	3548.78	51.7285	90.5657	153.393	212.611	250.187
3546.85	51.0115	39.876	51.9884	61.2455	48.7948	3546.85	51.0115	89.876	151.988	211.245	248.795
3544.92	50.5919	39.3836	51.3835	60.8236	48.5847	3544.92	50.5919	89.3836	151.383	210.824	248.585
3542.99	50.4746	39.6151	51.6361	62.0613	49.4711	3542.99	50.4746	89.6151	151.636	212.061	249.471
3541.06	50.2455	39.8852	51.5788	63.0917	49.8996	3541.06	50.2455	89.8852	151.579	213.092	249.9
3539.13	49.7367	39.7345	50.9016	63.1629	49.5589	3539.13	49.7367	89.7345	150.902	213.163	249.559
3537.2	49.1837	39.317	49.9816	62.5999	48.8705	3537.2	49.1837	89.317	149.982	212.6	248.871
3535.28	48.7268	38.9626	49.4079	62.4528	48.6459	3535.28	48.7268	88.9626	149.408	212.453	248.646
3533.35	48.377	38.968	49.2224	62.9149	48.8158	3533.35	48.377	88.968	149.222	212.915	248.816
3531.42	47.8199	38.7241	48.5418	62.6303	48.2356	3531.42	47.8199	88.7241	148.542	212.63	248.236
3529.49	47.2167	38.2576	47.7357	61.8891	47.4454	3529.49	47.2167	88.2576	147.736	211.889	247.445
3527.56	46.6564	37.8168	47.1303	61.2998	46.8596	3527.56	46.6564	87.8168	147.13	211.3	246.86
3525.63	46.2397	37.6321	46.8655	61.1491	46.6273	3525.63	46.2397	87.6321	146.865	211.149	246.627
3523.7	45.8143	37.4405	46.53	60.976	46.2189	3523.7	45.8143	87.4405	146.53	210.976	246.219
3521.78	45.5113	37.4315	46.6785	61.5402	46.483	3521.78	45.5113	87.4315	146.679	211.54	246.483
3519.85	45.1666	37.5647	46.8188	62.2721	46.6875	3519.85	45.1666	87.5647	146.819	212.272	246.687
3517.92	44.7129	37.4266	46.6172	62.3586	46.3898	3517.92	44.7129	87.4266	146.617	212.359	246.39
3515.99	44.2702	37.2535	46.4927	62.4723	46.1859	3515.99	44.2702	87.2535	146.493	212.472	246.186
3514.06	43.8901	37.0931	46.3801	62.5055	45.9018	3514.06	43.8901	87.0931	146.38	212.506	245.902
3512.13	43.3997	36.8046	46.0908	62.2154	45.3675	3512.13	43.3997	86.8046	146.091	212.215	245.368
3510.2	42.8061	36.3456	45.6332	61.5435	44.5935	3510.2	42.8061	86.3456	145.633	211.543	244.594
3508.27	42.2989	35.9974	45.5374	61.4456	44.3347	3508.27	42.2989	85.9974	145.537	211.446	244.335
3506.35	41.9413	35.9362	45.6695	61.8521	44.2834	3506.35	41.9413	85.9362	145.669	211.852	244.283
3504.42	41.4289	35.4897	45.2059	61.2782	43.39	3504.42	41.4289	85.4897	145.206	211.278	243.39
3502.49	40.9652	34.9065	44.9285	60.7029	42.799	3502.49	40.9652	84.9065	144.928	210.703	242.799
3500.56	40.6395	34.765	45.2141	61.2582	42.9684	3500.56	40.6395	84.765	145.214	211.258	242.968
3498.63	40.3215	34.7327	45.3319	61.8339	42.9152	3498.63	40.3215	84.7327	145.332	211.834	242.915
3496.7	39.8628	34.4291	45.0458	61.7614	42.4108	3496.7	39.8628	84.4291	145.046	211.761	242.411
3494.77	39.4185	34.1004	44.8466	61.7304	42.0877	3494.77	39.4185	84.1004	144.847	211.73	242.088
3492.85	38.9833	33.8302	44.6468	61.8691	41.8135	3492.85	38.9833	83.8302	144.647	211.869	241.813
3490.92	38.5362	33.4849	44.2476	61.8018	41.3685	3490.92	38.5362	83.4849	144.248	211.802	241.368
3488.99	38.0445	33.0158	43.6761	61.5112	40.7824	3488.99	38.0445	83.0158	143.676	211.511	240.782
3487.06	37.6321	32.5508	43.192	61.3362	40.3483	3487.06	37.6321	82.5508	143.192	211.336	240.348
3485.13	37.2384	32.1792	42.7902	61.3974	40.0225	3485.13	37.2384	82.1792	142.79	211.397	240.022
3483.2	36.7868	31.7115	42.187	61.091	39.3986	3483.2	36.7868	81.7115	142.187	211.091	239.399
3481.27	36.3286	31.1375	41.6026	60.7198	38.8336	3481.27	36.3286	81.1375	141.603	210.72	238.834
3479.34	36.0459	30.8094	41.3995	60.9939	38.718	3479.34	36.0459	80.8094	141.399	210.994	238.718
3477.42	35.7208	30.5078	41.1075	61.2809	38.476	3477.42	35.7208	80.5078	141.108	211.281	238.476
3475.49	35.2923	30.0268	40.5387	61.1057	37.9592	3475.49	35.2923	80.0268	140.539	211.106	237.959
3473.56	34.8409	29.4937	39.9504	60.9662	37.5158	3473.56	34.8409	79.4937	139.95	210.966	237.516
3471.63	34.4867	29.037	39.4102	60.9714	37.1794	3471.63	34.4867	79.037	139.41	210.971	237.179
3469.7	34.1978	28.5888	38.8054	60.9348	36.8108	3469.7	34.1978	78.5888	138.805	210.935	236.811
3467.77	33.9442	28.1346	38.1754	60.7949	36.4171	3467.77	33.9442	78.1346	138.175	210.795	236.417
3465.84	33.5873	27.6211	37.5273	60.6117	35.9899	3465.84	33.5873	77.6211	137.527	210.612	235.99
3463.92	33.164	27.1372	36.908	60.4322	35.5369	3463.92	33.164	77.1372	136.908	210.432	235.537
3461.99	32.6923	26.6109	36.2737	60.1473	35.0037	3461.99	32.6923	76.6109	136.274	210.147	235.004
3460.06	32.3515	26.2061	35.8695	60.0812	34.6735	3460.06	32.3515	76.2061	135.869	210.081	234.673
3458.13	32.0166	25.8613	35.5069	60.0768	34.3205	3458.13	32.0166	75.8613	135.507	210.077	234.321
3456.2	31.6592	25.5265	35.1453	59.9726	33.9383	3456.2	31.6592	75.5265	135.145	209.973	233.938
3454.27	31.2742	25.1969	34.7925	59.8461	33.539	3454.27	31.2742	75.1969	134.793	209.846	233.539
3452.34	30.9414	24.8931	34.5076	59.7292	33.1713	3452.34	30.9414	74.8931	134.508	209.729	233.171
3450.41	30.6025	24.554	34.2024	59.5091	32.7462	3450.41	30.6025	74.554	134.202	209.509	232.746
3448.49	30.2648	24.0952	33.7966	58.9272	32.1287	3448.49	30.2648	74.0952	133.797	208.927	232.129
3446.56	29.8971	23.4354	33.4431	58.3508	31.6134	3446.56	29.8971	73.4354	133.443	208.351	231.613
3444.63	29.6215	22.8329	33.4325	58.4532	31.4988	3444.63	29.6215	72.8329	133.433	208.453	231.499
3442.7	29.3258	22.0226	33.2679	58.3758	31.1361	3442.7	29.3258	72.0226	133.268	208.376	231.136
3440.77	29.0398	21.0539	33.1431	58.2425	30.8448	3440.77	29.0398	71.0539	133.143	208.243	230.845
3438.84	28.8013	20.1788	33.0404	58.1495	30.5614	3438.84	28.8013	70.1788	133.04	208.15	230.561
3436.91	28.6405	19.5701	32.9286	57.9454	30.2805	3436.91	28.6405	69.5701	132.929	207.945	230.281
3434.98	28.4537	19.3416	32.7857	57.7195	29.9999	3434.98	28.4537	69.3416	132.786	207.72	230
3433.06	28.188	19.4736	32.5619	57.3924	29.6561	3433.06	28.188	69.4736	132.562	207.392	229.656
3431.13	27.8597	19.8142	32.2655	57.0111	29.2616	3431.13	27.8597	69.8142	132.265	207.011	229.262
3429.2	27.5911	20.2859	32.0234	56.6761	28.9439	3429.2	27.5911	70.2859	132.023	206.676	228.944
3427.27	27.3047	20.7361	31.7716	56.3148	28.6119	3427.27	27.3047	70.7361	131.772	206.315	228.612
3425.34	27.0086	21.1325	31.5304	55.8929	28.2689	3425.34	27.0086	71.1325	131.53	205.893	228.269
3423.41	26.6996	21.4317	31.2539	55.2971	27.823	3423.41	26.6996	71.4317	131.254	205.297	227.823
3421.48	26.4586	21.6689	31.0627	54.5456	27.3942	3421.48	26.4586	71.6689	131.063	204.546	227.394
3419.56	26.2556	21.931	31.1154	54.0008	27.1548	3419.56	26.2556	71.931	131.115	204.001	227.155
3417.63	26.1121	22.2638	31.4259	53.7067	27.0712	3417.63	26.1121	72.2638	131.426	203.707	227.071
3415.7	25.9488	22.5035	31.736	53.1935	26.8519	3415.7	25.9488	72.5035	131.736	203.194	226.852
3413.77	25.8547	22.7111	32.1305	52.4763	26.6301	3413.77	25.8547	72.7111	132.131	202.476	226.63
3411.84	25.7853	22.8985	32.6114	51.6855	26.4364	3411.84	25.7853	72.8985	132.611	201.685	226.436
3409.91	25.7082	23.0674	33.1285	50.8291	26.2742	3409.91	25.7082	73.0674	133.128	200.829	226.274
3407.98	25.5956	23.2	33.5998	49.8773	26.078	3407.98	25.5956	73.2	133.6	199.877	226.078
3406.05	25.4849	23.3047	34.0479	48.8503	25.8891	3406.05	25.4849	73.3047	134.048	198.85	225.889
3404.13	25.3841	23.3649	34.4058	47.6814	25.6666	3404.13	25.3841	73.3649	134.406	197.681	225.667
3402.2	25.4048	23.4177	34.7365	46.3894	25.4878	3402.2	25.4048	73.4177	134.736	196.389	225.488
3400.27	25.4825	23.4367	35.0264	44.9653	25.3023	3400.27	25.4825	73.4367	135.026	194.965	225.302
3398.34	25.4916	23.3907	35.2358	43.3961	25.0612	3398.34	25.4916	73.3907	135.236	193.396	225.061
3396.41	25.3679	23.2617	35.4026	41.7295	24.7882	3396.41	25.3679	73.2617	135.403	191.729	224.788
3394.48	25.2994	23.1349	35.5848	40.0251	24.5231	3394.48	25.2994	73.1349	135.585	190.025	224.523
3392.55	25.3028	22.9181	35.6711	38.0336	24.1472	3392.55	25.3028	72.9181	135.671	188.034	224.147
3390.63	25.3585	22.7364	35.863	35.9788	23.871	3390.63	25.3585	72.7364	135.863	185.979	223.871
3388.7	25.3246	22.5474	36.0052	33.8689	23.492	3388.7	25.3246	72.5474	136.005	183.869	223.492
3386.77	25.2344	22.3144	36.0677	31.5833	23.0011	3386.77	25.2344	72.3144	136.068	181.583	223.001
3384.84	25.1477	22.0707	36.0834	29.144	22.4267	3384.84	25.1477	72.0707	136.083	179.144	222.427
3382.91	25.1598	21.9273	36.1522	26.7293	21.89	3382.91	25.1598	71.9273	136.152	176.729	221.89
3380.98	25.2042	21.8617	36.1947	24.4201	21.3044	3380.98	25.2042	71.8617	136.195	174.42	221.304
3379.05	25.2608	21.8506	36.2099	22.2281	20.6954	3379.05	25.2608	71.8506	136.21	172.228	220.695
3377.12	25.2912	21.902	36.2057	20.2301	20.076	3377.12	25.2912	71.902	136.206	170.23	220.076
3375.2	25.3302	22.031	36.209	18.5778	19.5334	3375.2	25.3302	72.031	136.209	168.578	219.533
3373.27	25.3431	22.1849	36.1909	17.2742	19.0455	3373.27	25.3431	72.1849	136.191	167.274	219.046
3371.34	25.415	22.3408	36.1718	16.3842	18.6817	3371.34	25.415	72.3408	136.172	166.384	218.682
3369.41	25.521	22.4513	36.0987	15.8719	18.4161	3369.41	25.521	72.4513	136.099	165.872	218.416
3367.48	25.63	22.5512	36.0311	15.7783	18.3321	3367.48	25.63	72.5512	136.031	165.778	218.332
3365.55	25.6462	22.6431	36.0094	16.0514	18.4059	3365.55	25.6462	72.6431	136.009	166.051	218.406
3363.62	25.6121	22.7513	36.0571	16.7036	18.6506	3363.62	25.6121	72.7513	136.057	166.704	218.651
3361.69	25.5721	22.8233	36.0637	17.6271	18.9556	3361.69	25.5721	72.8233	136.064	167.627	218.956
3359.77	25.6065	22.897	36.0899	18.7717	19.3629	3359.77	25.6065	72.897	136.09	168.772	219.363
3357.84	25.6375	22.9504	36.0951	20.0448	19.7805	3357.84	25.6375	72.9504	136.095	170.045	219.781
3355.91	25.6567	22.9855	36.0915	21.4016	20.2107	3355.91	25.6567	72.9855	136.092	171.402	220.211
3353.98	25.6728	23.0517	36.1237	22.793	20.6455	3353.98	25.6728	73.0517	136.124	172.793	220.645
3352.05	25.7419	23.1435	36.1525	24.2001	21.066	3352.05	25.7419	73.1435	136.152	174.2	221.066
3350.12	25.8091	23.2202	36.1252	25.5149	21.4173	3350.12	25.8091	73.2202	136.125	175.515	221.417
3348.19	25.8644	23.3365	36.1271	26.797	21.7694	3348.19	25.8644	73.3365	136.127	176.797	221.769
3346.27	25.8593	23.4845	36.1397	28.0561	22.086	3346.27	25.8593	73.4845	136.14	178.056	222.086
3344.34	25.8757	23.6502	36.1635	29.28	22.3934	3344.34	25.8757	73.6502	136.164	179.28	222.393
3342.41	25.8973	23.8067	36.1657	30.4364	22.6577	3342.41	25.8973	73.8067	136.166	180.436	222.658
3340.48	25.9313	23.9875	36.1865	31.5911	22.9213	3340.48	25.9313	73.9875	136.186	181.591	222.921
3338.55	25.9526	24.1566	36.1773	32.701	23.1372	3338.55	25.9526	74.1566	136.177	182.701	223.137
3336.62	25.975	24.3036	36.1811	33.7789	23.3536	3336.62	25.975	74.3036	136.181	183.779	223.354
3334.69	25.9788	24.4838	36.2669	34.9041	23.622	3334.69	25.9788	74.4838	136.267	184.904	223.622
3332.76	26.0106	24.7053	36.4041	36.0733	23.9143	3332.76	26.0106	74.7053	136.404	186.073	223.914
3330.84	26.0319	24.8752	36.4921	37.1233	24.1299	3330.84	26.0319	74.8752	136.492	187.123	224.13
3328.91	26.055	25.0084	36.5385	38.0361	24.3192	3328.91	26.055	75.0084	136.539	188.036	224.319
3326.98	26.0684	25.0943	36.5386	38.8384	24.477	3326.98	26.0684	75.0943	136.539	188.838	224.477
3325.05	26.105	25.1546	36.541	39.5737	24.6404	3325.05	26.105	75.1546	136.541	189.574	224.64
3323.12	26.1379	25.1984	36.5545	40.2309	24.7929	3323.12	26.1379	75.1984	136.554	190.231	224.793
3321.19	26.1841	25.239	36.563	40.7992	24.9508	3321.19	26.1841	75.239	136.563	190.799	224.951
3319.26	26.2188	25.2713	36.5369	41.2516	25.072	3319.26	26.2188	75.2713	136.537	191.252	225.072
3317.34	26.262	25.3143	36.5236	41.6282	25.1898	3317.34	26.262	75.3143	136.524	191.628	225.19
3315.41	26.2925	25.3543	36.5264	41.9488	25.2877	3315.41	26.2925	75.3543	136.526	191.949	225.288
3313.48	26.3412	25.4146	36.551	42.2119	25.3815	3313.48	26.3412	75.4146	136.551	192.212	225.381
3311.55	26.3626	25.4938	36.6054	42.4443	25.4606	3311.55	26.3626	75.4938	136.605	192.444	225.461
3309.62	26.3932	25.5826	36.6794	42.6632	25.5302	3309.62	26.3932	75.5826	136.679	192.663	225.53
3307.69	26.4179	25.6717	36.7817	42.9136	25.6166	3307.69	26.4179	75.6717	136.782	192.914	225.617
3305.76	26.4676	25.8075	36.9429	43.2215	25.7461	3305.76	26.4676	75.8075	136.943	193.222	225.746
3303.83	26.5065	25.9301	37.074	43.4551	25.8212	3303.83	26.5065	75.9301	137.074	193.455	225.821
3301.91	26.5721	26.0664	37.2318	43.6464	25.9108	3301.91	26.5721	76.0664	137.232	193.646	225.911
3299.98	26.6257	26.1915	37.3787	43.804	25.9804	3299.98	26.6257	76.1915	137.379	193.804	225.98
3298.05	26.6806	26.3034	37.5149	43.9383	26.0503	3298.05	26.6806	76.3034	137.515	193.938	226.05
3296.12	26.7192	26.4007	37.6373	44.0884	26.1343	3296.12	26.7192	76.4007	137.637	194.088	226.134
3294.19	26.7812	26.5063	37.7415	44.2412	26.2237	3294.19	26.7812	76.5063	137.742	194.241	226.224
3292.26	26.8321	26.5814	37.8131	44.3249	26.2752	3292.26	26.8321	76.5814	137.813	194.325	226.275
3290.33	26.8977	26.6785	37.9498	44.4606	26.3855	3290.33	26.8977	76.6785	137.95	194.461	226.385
3288.4	26.9454	26.7889	38.0973	44.6335	26.4807	3288.4	26.9454	76.7889	138.097	194.634	226.481
3286.48	27.0091	26.8896	38.2304	44.8072	26.5775	3286.48	27.0091	76.8896	138.23	194.807	226.578
3284.55	27.0727	26.9501	38.3089	44.956	26.6352	3284.55	27.0727	76.9501	138.309	194.956	226.635
3282.62	27.144	27.0145	38.3853	45.1378	26.7201	3282.62	27.144	77.0145	138.385	195.138	226.72
3280.69	27.2109	27.0757	38.4648	45.3819	26.8255	3280.69	27.2109	77.0757	138.465	195.382	226.826
3278.76	27.3	27.1065	38.52	45.6275	26.9214	3278.76	27.3	77.1065	138.52	195.627	226.921
3276.83	27.3761	27.1003	38.5281	45.8303	26.9838	3276.83	27.3761	77.1003	138.528	195.83	226.984
3274.9	27.4752	27.0968	38.5327	46.04	27.0767	3274.9	27.4752	77.0968	138.533	196.04	227.077
3272.98	27.5822	27.1035	38.5469	46.2861	27.1914	3272.98	27.5822	77.1035	138.547	196.286	227.191
3271.05	27.7079	27.1261	38.5769	46.5388	27.3291	3271.05	27.7079	77.1261	138.577	196.539	227.329
3269.12	27.8254	27.1424	38.5548	46.7153	27.4157	3269.12	27.8254	77.1424	138.555	196.715	227.416
3267.19	27.9406	27.1763	38.505	46.8051	27.4807	3267.19	27.9406	77.1763	138.505	196.805	227.481
3265.26	28.0338	27.1991	38.4165	46.8299	27.5004	3265.26	28.0338	77.1991	138.416	196.83	227.5
3263.33	28.158	27.229	38.3361	46.8376	27.5379	3263.33	28.158	77.229	138.336	196.838	227.538
3261.4	28.2837	27.2592	38.2501	46.8067	27.5591	3261.4	28.2837	77.2592	138.25	196.807	227.559
3259.47	28.4231	27.2819	38.1648	46.7314	27.5783	3259.47	28.4231	77.2819	138.165	196.731	227.578
3257.55	28.5576	27.2883	38.0651	46.6076	27.5774	3257.55	28.5576	77.2883	138.065	196.608	227.577
3255.62	28.6991	27.2911	37.9657	46.4315	27.5834	3255.62	28.6991	77.2911	137.966	196.431	227.583
3253.69	28.8314	27.29	37.9007	46.2566	27.5947	3253.69	28.8314	77.29	137.901	196.257	227.595
3251.76	28.9951	27.3235	37.9013	46.1329	27.6501	3251.76	28.9951	77.3235	137.901	196.133	227.65
3249.83	29.1535	27.3469	37.8733	45.9701	27.6566	3249.83	29.1535	77.3469	137.873	195.97	227.657
3247.9	29.309	27.3464	37.8279	45.7494	27.6496	3247.9	29.309	77.3464	137.828	195.749	227.65
3245.97	29.4483	27.313	37.7369	45.4693	27.5993	3245.97	29.4483	77.313	137.737	195.469	227.599
3244.05	29.6124	27.293	37.7149	45.2503	27.6166	3244.05	29.6124	77.293	137.715	195.25	227.617
3242.12	29.7805	27.3219	37.7515	45.1446	27.6764	3242.12	29.7805	77.3219	137.752	195.145	227.676
3240.19	29.9552	27.3249	37.7518	44.9999	27.6994	3240.19	29.9552	77.3249	137.752	195	227.699
3238.26	30.1173	27.2975	37.7359	44.8132	27.7149	3238.26	30.1173	77.2975	137.736	194.813	227.715
3236.33	30.2881	27.2587	37.7171	44.6131	27.7397	3236.33	30.2881	77.2587	137.717	194.613	227.74
3234.4	30.4266	27.2009	37.6745	44.4018	27.7518	3234.4	30.4266	77.2009	137.675	194.402	227.752
3232.47	30.5667	27.1353	37.6089	44.1704	27.7496	3232.47	30.5667	77.1353	137.609	194.17	227.75
3230.54	30.7264	27.0924	37.5573	43.9727	27.7564	3230.54	30.7264	77.0924	137.557	193.973	227.756
3228.62	30.9246	27.0884	37.5269	43.8308	27.7818	3228.62	30.9246	77.0884	137.527	193.831	227.782
3226.69	31.114	27.088	37.4869	43.695	27.7971	3226.69	31.114	77.088	137.487	193.695	227.797
3224.76	31.3041	27.0945	37.424	43.556	27.813	3224.76	31.3041	77.0945	137.424	193.556	227.813
3222.83	31.475	27.086	37.3164	43.3799	27.7708	3222.83	31.475	77.086	137.316	193.38	227.771
3220.9	31.6511	27.0633	37.179	43.1531	27.6972	3220.9	31.6511	77.0633	137.179	193.153	227.697
3218.97	31.8236	27.0361	37.0367	42.9101	27.632	3218.97	31.8236	77.0361	137.037	192.91	227.632
3217.04	32.0111	27.0484	36.9353	42.7184	27.6069	3217.04	32.0111	77.0484	136.935	192.718	227.607
3215.11	32.1861	27.0413	36.7713	42.4854	27.5275	3215.11	32.1861	77.0413	136.771	192.485	227.527
3213.19	32.3807	27.0316	36.6139	42.2376	27.4807	3213.19	32.3807	77.0316	136.614	192.238	227.481
3211.26	32.575	27.0408	36.4587	42.0031	27.4269	3211.26	32.575	77.0408	136.459	192.003	227.427
3209.33	32.7837	27.0393	36.2808	41.7219	27.36	3209.33	32.7837	77.0393	136.281	191.722	227.36
3207.4	32.9878	27.0565	36.132	41.4588	27.3276	3207.4	32.9878	77.0565	136.132	191.459	227.328
3205.47	33.1994	27.0807	35.9667	41.1718	27.2689	3205.47	33.1994	77.0807	135.967	191.172	227.269
3203.54	33.4143	27.092	35.7867	40.8194	27.1997	3203.54	33.4143	77.092	135.787	190.819	227.2
3201.61	33.6355	27.115	35.6195	40.4204	27.1438	3201.61	33.6355	77.115	135.62	190.42	227.144
3199.69	33.8386	27.1267	35.4445	39.9603	27.0578	3199.69	33.8386	77.1267	135.444	189.96	227.058
3197.76	34.0405	27.1358	35.2838	39.4459	26.9846	3197.76	34.0405	77.1358	135.284	189.446	226.985
3195.83	34.252	27.1771	35.1798	38.9593	26.9534	3195.83	34.252	77.1771	135.18	188.959	226.953
3193.9	34.4805	27.2481	35.1035	38.5004	26.9228	3193.9	34.4805	77.2481	135.103	188.5	226.923
3191.97	34.694	27.3001	35.0099	37.9955	26.8621	3191.97	34.694	77.3001	135.01	187.996	226.862
3190.04	34.9067	27.351	34.9352	37.4744	26.8166	3190.04	34.9067	77.351	134.935	187.474	226.817
3188.11	35.107	27.3997	34.8797	36.9554	26.7598	3188.11	35.107	77.3997	134.88	186.955	226.76
3186.18	35.3146	27.4501	34.8367	36.4359	26.6969	3186.18	35.3146	77.4501	134.837	186.436	226.697
3184.26	35.5168	27.5106	34.8136	35.9254	26.6479	3184.26	35.5168	77.5106	134.814	185.925	226.648
3182.33	35.727	27.596	34.8273	35.4649	26.6269	3182.33	35.727	77.596	134.827	185.465	226.627
3180.4	35.9193	27.6605	34.8246	35.0032	26.569	3180.4	35.9193	77.6605	134.825	185.003	226.569
3178.47	36.1222	27.7021	34.8314	34.5351	26.5104	3178.47	36.1222	77.7021	134.831	184.535	226.51
3176.54	36.3353	27.768	34.9131	34.1384	26.5272	3176.54	36.3353	77.768	134.913	184.138	226.527
3174.61	36.5549	27.8655	35.0435	33.8444	26.5681	3174.61	36.5549	77.8655	135.043	183.844	226.568
3172.68	36.7642	27.9384	35.1613	33.5697	26.5805	3172.68	36.7642	77.9384	135.161	183.57	226.58
3170.76	36.9878	28.0175	35.313	33.3536	26.6254	3170.76	36.9878	78.0175	135.313	183.354	226.625
3168.83	37.1991	28.0923	35.4688	33.1957	26.6792	3168.83	37.1991	78.0923	135.469	183.196	226.679
3166.9	37.4192	28.1817	35.6527	33.1178	26.7601	3166.9	37.4192	78.1817	135.653	183.118	226.76
3164.97	37.6329	28.2701	35.8439	33.0997	26.854	3164.97	37.6329	78.2701	135.844	183.1	226.854
3163.04	37.8552	28.3557	36.0537	33.1327	26.9714	3163.04	37.8552	78.3557	136.054	183.133	226.971
3161.11	38.0726	28.4291	36.2675	33.2096	27.0933	3161.11	38.0726	78.4291	136.268	183.21	227.093
3159.18	38.3063	28.5133	36.5019	33.3441	27.2428	3159.18	38.3063	78.5133	136.502	183.344	227.243
3157.25	38.5305	28.5935	36.7401	33.5282	27.4009	3157.25	38.5305	78.5935	136.74	183.528	227.401
3155.33	38.7609	28.6702	36.9917	33.8003	27.59	3155.33	38.7609	78.6702	136.992	183.8	227.59
3153.4	38.9886	28.7402	37.2372	34.1453	27.7924	3153.4	38.9886	78.7402	137.237	184.145	227.792
3151.47	39.2309	28.813	37.477	34.5664	28.0264	3151.47	39.2309	78.813	137.477	184.566	228.026
3149.54	39.465	28.8891	37.717	35.0668	28.2788	3149.54	39.465	78.8891	137.717	185.067	228.279
3147.61	39.6938	28.9768	37.9527	35.6451	28.5497	3147.61	39.6938	78.9768	137.953	185.645	228.55
3145.68	39.9143	29.0558	38.1723	36.2768	28.8167	3145.68	39.9143	79.0558	138.172	186.277	228.817
3143.75	40.1492	29.135	38.3921	36.9604	29.1079	3143.75	40.1492	79.135	138.392	186.96	229.108
3141.82	40.3814	29.2033	38.5941	37.6869	29.4147	3141.82	40.3814	79.2033	138.594	187.687	229.415
3139.9	40.611	29.2699	38.795	38.4682	29.743	3139.9	40.611	79.2699	138.795	188.468	229.743
3137.97	40.8318	29.323	38.9898	39.2324	30.0547	3137.97	40.8318	79.323	138.99	189.232	230.055
3136.04	41.0784	29.3972	39.1817	39.9356	30.3692	3136.04	41.0784	79.3972	139.182	189.936	230.369
3134.11	41.3061	29.458	39.3186	40.5546	30.6294	3134.11	41.3061	79.458	139.319	190.555	230.629
3132.18	41.5367	29.5151	39.4833	41.1902	30.9253	3132.18	41.5367	79.5151	139.483	191.19	230.925
3130.25	41.7709	29.5964	39.6736	41.8859	31.2399	3130.25	41.7709	79.5964	139.674	191.886	231.24
3128.32	41.9913	29.6619	39.8049	42.5087	31.4888	3128.32	41.9913	79.6619	139.805	192.509	231.489
3126.4	42.2022	29.6978	39.9131	43.0386	31.7158	3126.4	42.2022	79.6978	139.913	193.039	231.716
3124.47	42.4184	29.7477	40.0293	43.5576	31.9421	3124.47	42.4184	79.7477	140.029	193.558	231.942
3122.54	42.6183	29.7783	40.1256	44.0637	32.1525	3122.54	42.6183	79.7783	140.126	194.064	232.152
3120.61	42.8329	29.8166	40.2509	44.6362	32.4263	3120.61	42.8329	79.8166	140.251	194.636	232.426
3118.68	43.0399	29.8402	40.3443	45.1702	32.6714	3118.68	43.0399	79.8402	140.344	195.17	232.671
3116.75	43.2655	29.8625	40.4223	45.6381	32.9262	3116.75	43.2655	79.8625	140.422	195.638	232.926
3114.82	43.5075	29.9011	40.5218	46.0973	33.2072	3114.82	43.5075	79.9011	140.522	196.097	233.207
3112.89	43.7668	29.9638	40.632	46.5317	33.4951	3112.89	43.7668	79.9638	140.632	196.532	233.495
3110.97	44.0076	30.0114	40.7005	46.9134	33.7318	3110.97	44.0076	80.0114	140.701	196.913	233.732
3109.04	44.2435	30.051	40.7638	47.2981	33.9614	3109.04	44.2435	80.051	140.764	197.298	233.961
3107.11	44.4695	30.086	40.8357	47.6677	34.1883	3107.11	44.4695	80.086	140.836	197.668	234.188
3105.18	44.6989	30.131	40.9156	47.9783	34.4129	3105.18	44.6989	80.131	140.916	197.978	234.413
3103.25	44.8973	30.1533	40.962	48.2107	34.5665	3103.25	44.8973	80.1533	140.962	198.211	234.566
3101.32	45.0753	30.1659	41.0352	48.4307	34.7154	3101.32	45.0753	80.1659	141.035	198.431	234.715
3099.39	45.2497	30.2235	41.1803	48.7186	34.922	3099.39	45.2497	80.2235	141.18	198.719	234.922
3097.47	45.4165	30.3126	41.3178	48.9452	35.0996	3097.47	45.4165	80.3126	141.318	198.945	235.1
3095.54	45.5581	30.3641	41.4214	49.0564	35.211	3095.54	45.5581	80.3641	141.421	199.056	235.211
3093.61	45.7265	30.429	41.6027	49.2345	35.3881	3093.61	45.7265	80.429	141.603	199.235	235.388
3091.68	45.9004	30.4874	41.7929	49.4837	35.5536	3091.68	45.9004	80.4874	141.793	199.484	235.554
3089.75	46.0784	30.4937	41.9745	49.7835	35.7224	3089.75	46.0784	80.4937	141.974	199.783	235.722
3087.82	46.2605	30.4544	42.1342	50.1201	35.8978	3087.82	46.2605	80.4544	142.134	200.12	235.898
3085.89	46.4665	30.4078	42.2857	50.4663	36.0955	3085.89	46.4665	80.4078	142.286	200.466	236.095
3083.96	46.6732	30.3616	42.4007	50.759	36.2526	3083.96	46.6732	80.3616	142.401	200.759	236.253
3082.04	46.8837	30.3339	42.4734	50.9629	36.3711	3082.04	46.8837	80.3339	142.473	200.963	236.371
3080.11	47.1079	30.3503	42.557	51.1488	36.5009	3080.11	47.1079	80.3503	142.557	201.149	236.501
3078.18	47.361	30.4506	42.7198	51.3567	36.6732	3078.18	47.361	80.4506	142.72	201.357	236.673
3076.25	47.6236	30.6307	42.9504	51.5098	36.8423	3076.25	47.6236	80.6307	142.95	201.51	236.842
3074.32	47.8847	30.8289	43.1728	51.51	36.9555	3074.32	47.8847	80.8289	143.173	201.51	236.955
3072.39	48.1518	31.0078	43.3672	51.4124	37.0313	3072.39	48.1518	81.0078	143.367	201.412	237.031
3070.46	48.4446	31.1794	43.5603	51.3431	37.1428	3070.46	48.4446	81.1794	143.56	201.343	237.143
3068.53	48.7202	31.325	43.7125	51.3376	37.2545	3068.53	48.7202	81.325	143.713	201.338	237.254
3066.61	48.98	31.4289	43.821	51.3212	37.3603	3066.61	48.98	81.4289	143.821	201.321	237.36
3064.68	49.2525	31.5315	43.9394	51.2043	37.4672	3064.68	49.2525	81.5315	143.939	201.204	237.467
3062.75	49.5535	31.6727	44.1496	50.9727	37.5887	3062.75	49.5535	81.6727	144.15	200.973	237.589
3060.82	49.8575	31.8079	44.4054	50.7306	37.691	3060.82	49.8575	81.8079	144.405	200.731	237.691
3058.89	50.1459	31.9067	44.6676	50.8032	37.8433	3058.89	50.1459	81.9067	144.668	200.803	237.843
3056.96	50.3978	31.9809	44.9438	51.2519	38.0669	3056.96	50.3978	81.9809	144.944	201.252	238.067
3055.03	50.6632	32.0663	45.2817	51.8739	38.3796	3055.03	50.6632	82.0663	145.282	201.874	238.38
3053.11	50.9411	32.1823	45.6241	52.5062	38.7082	3053.11	50.9411	82.1823	145.624	202.506	238.708
3051.18	51.1903	32.2685	45.8789	53.0214	38.9578	3051.18	51.1903	82.2685	145.879	203.021	238.958
3049.25	51.4165	32.3314	46.0767	53.4237	39.1783	3049.25	51.4165	82.3314	146.077	203.424	239.178
3047.32	51.6786	32.4293	46.2945	53.799	39.4468	3047.32	51.6786	82.4293	146.294	203.799	239.447
3045.39	51.9328	32.5399	46.4963	54.1945	39.6947	3045.39	51.9328	82.5399	146.496	204.194	239.695
3043.46	52.1631	32.6241	46.6775	54.5309	39.8969	3043.46	52.1631	82.6241	146.678	204.531	239.897
3041.53	52.3898	32.7117	46.8721	54.8188	40.0961	3041.53	52.3898	82.7117	146.872	204.819	240.096
3039.6	52.6457	32.8167	47.0767	55.0386	40.3085	3039.6	52.6457	82.8167	147.077	205.039	240.308
3037.68	52.9431	32.9462	47.2993	55.2019	40.5279	3037.68	52.9431	82.9462	147.299	205.202	240.528
3035.75	53.2123	33.0597	47.491	55.3267	40.6841	3035.75	53.2123	83.0597	147.491	205.327	240.684
3033.82	53.4053	33.1496	47.6612	55.4555	40.8065	3033.82	53.4053	83.1496	147.661	205.455	240.806
3031.89	53.6093	33.2512	47.829	55.5649	40.9409	3031.89	53.6093	83.2512	147.829	205.565	240.941
3029.96	53.8795	33.4121	48.0884	55.8038	41.1855	3029.96	53.8795	83.4121	148.088	205.804	241.186
3028.03	54.1586	33.6208	48.3678	56.1185	41.4532	3028.03	54.1586	83.6208	148.368	206.119	241.453
3026.1	54.3879	33.7756	48.5722	56.3432	41.6299	3026.1	54.3879	83.7756	148.572	206.343	241.63
3024.18	54.5909	33.9024	48.7841	56.5731	41.8225	3024.18	54.5909	83.9024	148.784	206.573	241.823
3022.25	54.7895	34.03	49.0117	56.7944	42.0151	3022.25	54.7895	84.03	149.012	206.794	242.015
3020.32	54.9905	34.163	49.2474	57.0115	42.2128	3020.32	54.9905	84.163	149.247	207.011	242.213
3018.39	55.1571	34.291	49.4788	57.2493	42.3945	3018.39	55.1571	84.291	149.479	207.249	242.395
3016.46	55.2871	34.3975	49.6729	57.4208	42.5297	3016.46	55.2871	84.3975	149.673	207.421	242.53
3014.53	55.3986	34.4852	49.8282	57.5364	42.6286	3014.53	55.3986	84.4852	149.828	207.536	242.629
3012.6	55.5153	34.5645	49.9867	57.6479	42.719	3012.6	55.5153	84.5645	149.987	207.648	242.719
3010.67	55.6721	34.6753	50.2022	57.8408	42.8706	3010.67	55.6721	84.6753	150.202	207.841	242.871
3008.75	55.8851	34.8348	50.4679	58.1271	43.0893	3008.75	55.8851	84.8348	150.468	208.127	243.089
3006.82	56.0882	34.9665	50.6982	58.4095	43.2751	3006.82	56.0882	84.9665	150.698	208.409	243.275
3004.89	56.2518	35.0458	50.8819	58.6819	43.4204	3004.89	56.2518	85.0458	150.882	208.682	243.42
3002.96	56.3941	35.1177	51.0932	59.025	43.6062	3002.96	56.3941	85.1177	151.093	209.025	243.606
3001.03	56.5203	35.2034	51.3211	59.3773	43.8004	3001.03	56.5203	85.2034	151.321	209.377	243.8
2999.1	56.614	35.2728	51.5308	59.6944	43.9554	2999.1	56.614	85.2728	151.531	209.694	243.955
2997.17	56.6872	35.3316	51.7271	59.981	44.0915	2997.17	56.6872	85.3316	151.727	209.981	244.091
2995.25	56.7542	35.3728	51.903	60.1801	44.1881	2995.25	56.7542	85.3728	151.903	210.18	244.188
2993.32	56.8303	35.422	52.1024	60.3726	44.2963	2993.32	56.8303	85.422	152.102	210.373	244.296
2991.39	56.8877	35.483	52.3227	60.5758	44.4208	2991.39	56.8877	85.483	152.323	210.576	244.421
2989.46	56.953	35.5375	52.5108	60.6722	44.5104	2989.46	56.953	85.5375	152.511	210.672	244.51
2987.53	57.0225	35.576	52.6674	60.7234	44.5734	2987.53	57.0225	85.576	152.667	210.723	244.573
2985.6	57.079	35.6135	52.8408	60.8586	44.6752	2985.6	57.079	85.6135	152.841	210.859	244.675
2983.67	57.1125	35.6322	52.9909	61.0645	44.7835	2983.67	57.1125	85.6322	152.991	211.065	244.783
2981.74	57.1206	35.6247	53.1071	61.3074	44.8901	2981.74	57.1206	85.6247	153.107	211.307	244.89
2979.82	57.1201	35.6064	53.2023	61.5786	45.0054	2979.82	57.1201	85.6064	153.202	211.579	245.005
2977.89	57.1452	35.6053	53.2919	61.8441	45.1408	2977.89	57.1452	85.6053	153.292	211.844	245.141
2975.96	57.1674	35.6051	53.3665	62.0769	45.26	2975.96	57.1674	85.6051	153.367	212.077	245.26
2974.03	57.1786	35.5874	53.423	62.2799	45.3686	2974.03	57.1786	85.5874	153.423	212.28	245.369
2972.1	57.1973	35.5776	53.4895	62.5	45.5042	2972.1	57.1973	85.5776	153.49	212.5	245.504
2970.17	57.2237	35.5869	53.5627	62.7004	45.6375	2970.17	57.2237	85.5869	153.563	212.7	245.638
2968.24	57.2446	35.5883	53.6311	62.8519	45.7509	2968.24	57.2446	85.5883	153.631	212.852	245.751
2966.31	57.2659	35.5838	53.6985	62.9784	45.8637	2966.31	57.2659	85.5838	153.698	212.978	245.864
2964.39	57.2905	35.5823	53.7703	63.1261	45.9914	2964.39	57.2905	85.5823	153.77	213.126	245.991
2962.46	57.3164	35.5874	53.8482	63.2714	46.1218	2962.46	57.3164	85.5874	153.848	213.271	246.122
2960.53	57.3536	35.5962	53.9437	63.4122	46.2572	2960.53	57.3536	85.5962	153.944	213.412	246.257
2958.6	57.416	35.6156	54.07	63.5563	46.409	2958.6	57.416	85.6156	154.07	213.556	246.409
2956.67	57.4887	35.6373	54.1987	63.6946	46.551	2956.67	57.4887	85.6373	154.199	213.695	246.551
2954.74	57.5706	35.6662	54.3386	63.8455	46.7029	2954.74	57.5706	85.6662	154.339	213.846	246.703
2952.81	57.6573	35.7023	54.4944	64.0359	46.8699	2952.81	57.6573	85.7023	154.494	214.036	246.87
2950.89	57.7531	35.7517	54.6632	64.1979	47.0389	2950.89	57.7531	85.7517	154.663	214.198	247.039
2948.96	57.8585	35.8074	54.8276	64.3225	47.2007	2948.96	57.8585	85.8074	154.828	214.322	247.201
2947.03	57.9619	35.8546	54.9868	64.4671	47.3645	2947.03	57.9619	85.8546	154.987	214.467	247.365
2945.1	58.0322	35.8823	55.1243	64.5971	47.506	2945.1	58.0322	85.8823	155.124	214.597	247.506
2943.17	58.0823	35.9075	55.2394	64.6905	47.6386	2943.17	58.0823	85.9075	155.239	214.69	247.639
2941.24	58.121	35.9345	55.3452	64.7517	47.7617	2941.24	58.121	85.9345	155.345	214.752	247.762
2939.31	58.1459	35.9523	55.4389	64.8058	47.8725	2939.31	58.1459	85.9523	155.439	214.806	247.872
2937.38	58.1374	35.9557	55.4979	64.8658	47.9599	2937.38	58.1374	85.9557	155.498	214.866	247.96
2935.46	58.1061	35.9478	55.5318	64.9206	48.031	2935.46	58.1061	85.9478	155.532	214.921	248.031
2933.53	58.0499	35.9261	55.5494	64.9713	48.0895	2933.53	58.0499	85.9261	155.549	214.971	248.089
2931.6	57.9701	35.9088	55.5615	65.0346	48.1411	2931.6	57.9701	85.9088	155.561	215.035	248.141
2929.67	57.8705	35.892	55.5584	65.1027	48.168	2929.67	57.8705	85.892	155.558	215.103	248.168
2927.74	57.7892	35.8822	55.5808	65.143	48.2024	2927.74	57.7892	85.8822	155.581	215.143	248.202
2925.81	57.7436	35.8993	55.6465	65.1984	48.2626	2925.81	57.7436	85.8993	155.647	215.198	248.263
2923.88	57.7502	35.9566	55.7473	65.3058	48.3496	2923.88	57.7502	85.9566	155.747	215.306	248.35
2921.96	57.8023	36.0526	55.8817	65.4426	48.4549	2921.96	57.8023	86.0526	155.882	215.443	248.455
2920.03	57.9069	36.1901	56.0534	65.5985	48.5777	2920.03	57.9069	86.1901	156.053	215.599	248.578
2918.1	58.0408	36.3485	56.2369	65.7675	48.6939	2918.1	58.0408	86.3485	156.237	215.767	248.694
2916.17	58.2085	36.5206	56.423	65.9218	48.8104	2916.17	58.2085	86.5206	156.423	215.922	248.81
2914.24	58.407	36.6996	56.611	66.0478	48.9205	2914.24	58.407	86.6996	156.611	216.048	248.92
2912.31	58.6166	36.8752	56.7944	66.1485	49.0254	2912.31	58.6166	86.8752	156.794	216.148	249.025
2910.38	58.8147	37.0396	56.9782	66.2297	49.1308	2910.38	58.8147	87.0396	156.978	216.23	249.131
2908.45	59.0078	37.1991	57.163	66.3078	49.251	2908.45	59.0078	87.1991	157.163	216.308	249.251
2906.53	59.1866	37.3365	57.3278	66.3824	49.364	2906.53	59.1866	87.3365	157.328	216.382	249.364
2904.6	59.356	37.4626	57.4627	66.4647	49.4753	2904.6	59.356	87.4626	157.463	216.465	249.475
2902.67	59.5186	37.58	57.5721	66.5363	49.5845	2902.67	59.5186	87.58	157.572	216.536	249.584
2900.74	59.6883	37.7014	57.6857	66.5886	49.7062	2900.74	59.6883	87.7014	157.686	216.589	249.706
2898.81	59.8656	37.8271	57.8008	66.6479	49.8343	2898.81	59.8656	87.8271	157.801	216.648	249.834
2896.88	60.0457	37.9591	57.9192	66.7202	49.9581	2896.88	60.0457	87.9591	157.919	216.72	249.958
2894.95	60.2108	38.0852	58.0381	66.779	50.0711	2894.95	60.2108	88.0852	158.038	216.779	250.071
2893.02	60.3845	38.2233	58.17	66.8174	50.1966	2893.02	60.3845	88.2233	158.17	216.817	250.197
2891.1	60.5671	38.3639	58.3152	66.8563	50.3216	2891.1	60.5671	88.3639	158.315	216.856	250.322
2889.17	60.7478	38.4985	58.4634	66.8998	50.4469	2889.17	60.7478	88.4985	158.463	216.9	250.447
2887.24	60.913	38.6249	58.6106	66.9475	50.5669	2887.24	60.913	88.6249	158.611	216.948	250.567
2885.31	61.0648	38.7429	58.7542	66.991	50.6809	2885.31	61.0648	88.7429	158.754	216.991	250.681
2883.38	61.1986	38.8521	58.8884	67.0385	50.7875	2883.38	61.1986	88.8521	158.888	217.039	250.787
2881.45	61.3207	38.9573	59.0105	67.1024	50.8889	2881.45	61.3207	88.9573	159.011	217.102	250.889
2879.52	61.4261	39.0477	59.1231	67.1797	50.9826	2879.52	61.4261	89.0477	159.123	217.18	250.983
2877.6	61.5266	39.1301	59.2387	67.2703	51.0774	2877.6	61.5266	89.1301	159.239	217.27	251.077
2875.67	61.6215	39.2059	59.3406	67.3848	51.1662	2875.67	61.6215	89.2059	159.341	217.385	251.166
2873.74	61.7075	39.267	59.424	67.507	51.2409	2873.74	61.7075	89.267	159.424	217.507	251.241
2871.81	61.8028	39.3296	59.5155	67.6082	51.3099	2871.81	61.8028	89.3296	159.515	217.608	251.31
2869.88	61.9509	39.4266	59.641	67.6955	51.395	2869.88	61.9509	89.4266	159.641	217.695	251.395
2867.95	62.1189	39.5266	59.7752	67.7849	51.4801	2867.95	62.1189	89.5266	159.775	217.785	251.48
2866.02	62.2702	39.6042	59.8899	67.8678	51.5482	2866.02	62.2702	89.6042	159.89	217.868	251.548
2864.09	62.3975	39.6631	59.9765	67.9452	51.5959	2864.09	62.3975	89.6631	159.976	217.945	251.596
2862.17	62.4997	39.704	60.0331	67.9963	51.6234	2862.17	62.4997	89.704	160.033	217.996	251.623
2860.24	62.5597	39.7096	60.0556	68.0319	51.6164	2860.24	62.5597	89.7096	160.056	218.032	251.616
2858.31	62.5844	39.6992	60.0531	68.0636	51.5875	2858.31	62.5844	89.6992	160.053	218.064	251.588
2856.38	62.6024	39.6932	60.0481	68.0949	51.5553	2856.38	62.6024	89.6932	160.048	218.095	251.555
2854.45	62.6384	39.6974	60.0685	68.1268	51.5361	2854.45	62.6384	89.6974	160.069	218.127	251.536
2852.52	62.7196	39.7307	60.1311	68.1718	51.5372	2852.52	62.7196	89.7307	160.131	218.172	251.537
2850.59	62.8774	39.822	60.2375	68.2237	51.5679	2850.59	62.8774	89.822	160.238	218.224	251.568
2848.67	63.091	39.9483	60.357	68.2491	51.6019	2848.67	63.091	89.9483	160.357	218.249	251.602
2846.74	63.3411	40.0925	60.484	68.2542	51.6445	2846.74	63.3411	90.0925	160.484	218.254	251.645
2844.81	63.5937	40.2407	60.6115	68.2723	51.6968	2844.81	63.5937	90.2407	160.612	218.272	251.697
2842.88	63.8173	40.3647	60.7113	68.2869	51.739	2842.88	63.8173	90.3647	160.711	218.287	251.739
2840.95	63.9955	40.4463	60.7653	68.2633	51.7673	2840.95	63.9955	90.4463	160.765	218.263	251.767
2839.02	64.1433	40.4902	60.7749	68.1867	51.7789	2839.02	64.1433	90.4902	160.775	218.187	251.779
2837.09	64.2653	40.5148	60.7622	68.1	51.7934	2837.09	64.2653	90.5148	160.762	218.1	251.793
2835.16	64.3864	40.5446	60.7613	68.0525	51.8397	2835.16	64.3864	90.5446	160.761	218.053	251.84
2833.24	64.5099	40.5629	60.7619	68.0185	51.8916	2833.24	64.5099	90.5629	160.762	218.019	251.892
2831.31	64.6329	40.5729	60.7596	67.9683	51.9515	2831.31	64.6329	90.5729	160.76	217.968	251.952
2829.38	64.7454	40.5777	60.7565	67.9195	52.0127	2829.38	64.7454	90.5777	160.756	217.919	252.013
2827.45	64.855	40.5876	60.7594	67.8726	52.0784	2827.45	64.855	90.5876	160.759	217.873	252.078
2825.52	64.9661	40.5969	60.7723	67.8513	52.142	2825.52	64.9661	90.5969	160.772	217.851	252.142
2823.59	65.078	40.6121	60.7989	67.8772	52.2044	2823.59	65.078	90.6121	160.799	217.877	252.204
2821.66	65.1651	40.6288	60.8269	67.9272	52.2595	2821.66	65.1651	90.6288	160.827	217.927	252.259
2819.73	65.2542	40.6564	60.8738	67.9889	52.3216	2819.73	65.2542	90.6564	160.874	217.989	252.322
2817.81	65.3262	40.6872	60.9222	68.0455	52.3675	2817.81	65.3262	90.6872	160.922	218.046	252.367
2815.88	65.3939	40.7221	60.9659	68.0988	52.4026	2815.88	65.3939	90.7221	160.966	218.099	252.403
2813.95	65.4643	40.7595	61.0092	68.142	52.4263	2813.95	65.4643	90.7595	161.009	218.142	252.426
2812.02	65.5238	40.7911	61.047	68.1553	52.4421	2812.02	65.5238	90.7911	161.047	218.155	252.442
2810.09	65.5567	40.8085	61.0669	68.1101	52.4351	2810.09	65.5567	90.8085	161.067	218.11	252.435
2808.16	65.591	40.8417	61.0884	68.0477	52.4239	2808.16	65.591	90.8417	161.088	218.048	252.424
2806.23	65.6361	40.8879	61.1246	67.986	52.4201	2806.23	65.6361	90.8879	161.125	217.986	252.42
2804.31	65.6825	40.9333	61.1499	67.8856	52.4023	2804.31	65.6825	90.9333	161.15	217.886	252.402
2802.38	65.7196	40.9668	61.1575	67.727	52.3521	2802.38	65.7196	90.9668	161.158	217.727	252.352
2800.45	65.7462	40.9892	61.1554	67.503	52.2836	2800.45	65.7462	90.9892	161.155	217.503	252.284
2798.52	65.7598	40.9991	61.1323	67.2103	52.1951	2798.52	65.7598	90.9991	161.132	217.21	252.195
2796.59	65.7846	41.0105	61.0945	66.8537	52.0939	2796.59	65.7846	91.0105	161.095	216.854	252.094
2794.66	65.83	41.0238	61.0584	66.4562	52.0027	2794.66	65.83	91.0238	161.058	216.456	252.003
2792.73	65.8866	41.037	61.016	66.016	51.9191	2792.73	65.8866	91.037	161.016	216.016	251.919
2790.8	65.934	41.0416	60.9483	65.5464	51.8228	2790.8	65.934	91.0416	160.948	215.546	251.823
2788.88	65.9846	41.0425	60.8754	65.1351	51.7508	2788.88	65.9846	91.0425	160.875	215.135	251.751
2786.95	66.0578	41.0473	60.8212	64.8953	51.7281	2786.95	66.0578	91.0473	160.821	214.895	251.728
2785.02	66.149	41.0575	60.791	64.8665	51.769	2785.02	66.149	91.0575	160.791	214.867	251.769
2783.09	66.2341	41.0553	60.7596	64.9907	51.8489	2783.09	66.2341	91.0553	160.76	214.991	251.849
2781.16	66.3276	41.043	60.7277	65.2023	51.9515	2781.16	66.3276	91.043	160.728	215.202	251.952
2779.23	66.4275	41.0224	60.7056	65.4393	52.0583	2779.23	66.4275	91.0224	160.706	215.439	252.058
2777.3	66.5171	40.9992	60.681	65.666	52.1674	2777.3	66.5171	90.9992	160.681	215.666	252.167
2775.38	66.5877	40.9658	60.6477	65.8625	52.2592	2775.38	66.5877	90.9658	160.648	215.863	252.259
2773.45	66.6604	40.939	60.6334	66.0357	52.3474	2773.45	66.6604	90.939	160.633	216.036	252.347
2771.52	66.7485	40.9282	60.6412	66.1934	52.4497	2771.52	66.7485	90.9282	160.641	216.193	252.45
2769.59	66.845	40.9239	60.6578	66.3302	52.55	2769.59	66.845	90.9239	160.658	216.33	252.55
2767.66	66.93	40.8992	60.6699	66.4555	52.6354	2767.66	66.93	90.8992	160.67	216.455	252.635
2765.73	66.9985	40.8688	60.6806	66.5884	52.7198	2765.73	66.9985	90.8688	160.681	216.588	252.72
2763.8	67.0547	40.8402	60.6909	66.7451	52.802	2763.8	67.0547	90.8402	160.691	216.745	252.802
2761.87	67.112	40.8165	60.7038	66.9248	52.8847	2761.87	67.112	90.8165	160.704	216.925	252.885
2759.95	67.1647	40.7947	60.713	67.1275	52.978	2759.95	67.1647	90.7947	160.713	217.128	252.978
2758.02	67.2137	40.7794	60.7315	67.3571	53.0807	2758.02	67.2137	90.7794	160.731	217.357	253.081
2756.09	67.2567	40.7684	60.7479	67.5888	53.1724	2756.09	67.2567	90.7684	160.748	217.589	253.172
2754.16	67.3	40.7652	60.7641	67.8156	53.2664	2754.16	67.3	90.7652	160.764	217.816	253.266
2752.23	67.3437	40.7643	60.7821	68.037	53.3575	2752.23	67.3437	90.7643	160.782	218.037	253.357
2750.3	67.3693	40.7644	60.8019	68.2406	53.4278	2750.3	67.3693	90.7644	160.802	218.241	253.428
2748.37	67.3742	40.7633	60.8287	68.416	53.4787	2748.37	67.3742	90.7633	160.829	218.416	253.479
2746.44	67.3806	40.7706	60.87	68.5645	53.5291	2746.44	67.3806	90.7706	160.87	218.565	253.529
2744.52	67.4081	40.7803	60.9169	68.6816	53.5727	2744.52	67.4081	90.7803	160.917	218.682	253.573
2742.59	67.4448	40.7888	60.9727	68.7711	53.6137	2742.59	67.4448	90.7888	160.973	218.771	253.614
2740.66	67.4656	40.7899	61.026	68.8285	53.6357	2740.66	67.4656	90.7899	161.026	218.828	253.636
2738.73	67.4715	40.7877	61.0744	68.86	53.636	2738.73	67.4715	90.7877	161.074	218.86	253.636
2736.8	67.4628	40.7834	61.118	68.8745	53.6215	2736.8	67.4628	90.7834	161.118	218.875	253.621
2734.87	67.4683	40.7912	61.1652	68.8714	53.6081	2734.87	67.4683	90.7912	161.165	218.871	253.608
2732.94	67.4798	40.7977	61.2043	68.8612	53.5918	2732.94	67.4798	90.7977	161.204	218.861	253.592
2731.02	67.4845	40.8056	61.2408	68.863	53.5712	2731.02	67.4845	90.8056	161.241	218.863	253.571
2729.09	67.4823	40.8078	61.2781	68.886	53.5522	2729.09	67.4823	90.8078	161.278	218.886	253.552
2727.16	67.476	40.8126	61.3066	68.9439	53.5338	2727.16	67.476	90.8126	161.307	218.944	253.534
2725.23	67.4621	40.8223	61.3299	69.0389	53.5186	2725.23	67.4621	90.8223	161.33	219.039	253.519
2723.3	67.4705	40.8485	61.3716	69.1619	53.529	2723.3	67.4705	90.8485	161.372	219.162	253.529
2721.37	67.4977	40.8834	61.4092	69.2942	53.5424	2721.37	67.4977	90.8834	161.409	219.294	253.542
2719.44	67.5426	40.9344	61.4493	69.4279	53.5638	2719.44	67.5426	90.9344	161.449	219.428	253.564
2717.51	67.5911	40.9894	61.4877	69.5612	53.5908	2717.51	67.5911	90.9894	161.488	219.561	253.591
2715.59	67.6456	41.0535	61.5201	69.6868	53.6242	2715.59	67.6456	91.0535	161.52	219.687	253.624
2713.66	67.7076	41.1211	61.5469	69.8041	53.6704	2713.66	67.7076	91.1211	161.547	219.804	253.67
2711.73	67.7864	41.199	61.5764	69.924	53.7342	2711.73	67.7864	91.199	161.576	219.924	253.734
2709.8	67.8702	41.2763	61.6077	70.0383	53.8049	2709.8	67.8702	91.2763	161.608	220.038	253.805
2707.87	67.9665	41.3627	61.6494	70.1548	53.9004	2707.87	67.9665	91.3627	161.649	220.155	253.9
2705.94	68.0692	41.4518	61.6889	70.2663	54.0059	2705.94	68.0692	91.4518	161.689	220.266	254.006
2704.01	68.1817	41.5482	61.7371	70.374	54.1239	2704.01	68.1817	91.5482	161.737	220.374	254.124
2702.09	68.3007	41.6402	61.7913	70.4767	54.2492	2702.09	68.3007	91.6402	161.791	220.477	254.249
2700.16	68.4237	41.7351	61.8522	70.5747	54.3793	2700.16	68.4237	91.7351	161.852	220.575	254.379
2698.23	68.5385	41.8261	61.9151	70.6618	54.5022	2698.23	68.5385	91.8261	161.915	220.662	254.502
2696.3	68.6544	41.9237	61.9949	70.735	54.6215	2696.3	68.6544	91.9237	161.995	220.735	254.621
2694.37	68.7703	42.022	62.089	70.8005	54.7349	2694.37	68.7703	92.022	162.089	220.8	254.735
2692.44	68.8924	42.1266	62.1948	70.8703	54.8502	2692.44	68.8924	92.1266	162.195	220.87	254.85
2690.51	69.0122	42.2281	62.3121	70.9562	54.9572	2690.51	69.0122	92.2281	162.312	220.956	254.957
2688.58	69.1284	42.3245	62.4369	71.0689	55.0777	2688.58	69.1284	92.3245	162.437	221.069	255.078
2686.66	69.2423	42.4071	62.5513	71.1814	55.2008	2686.66	69.2423	92.4071	162.551	221.181	255.201
2684.73	69.3473	42.4822	62.6535	71.291	55.3152	2684.73	69.3473	92.4822	162.653	221.291	255.315
2682.8	69.4404	42.5441	62.7378	71.3902	55.4188	2682.8	69.4404	92.5441	162.738	221.39	255.419
2680.87	69.5247	42.5959	62.8078	71.4671	55.5152	2680.87	69.5247	92.5959	162.808	221.467	255.515
2678.94	69.6026	42.6373	62.863	71.5192	55.5992	2678.94	69.6026	92.6373	162.863	221.519	255.599
2677.01	69.6819	42.6779	62.9111	71.5603	55.6808	2677.01	69.6819	92.6779	162.911	221.56	255.681
2675.08	69.7665	42.7092	62.9515	71.5941	55.7513	2675.08	69.7665	92.7092	162.951	221.594	255.751
2673.15	69.8462	42.7367	62.9907	71.6318	55.8169	2673.15	69.8462	92.7367	162.991	221.632	255.817
2671.23	69.9152	42.7567	63.021	71.6717	55.8749	2671.23	69.9152	92.7567	163.021	221.672	255.875
2669.3	69.9892	42.7794	63.0431	71.7192	55.9295	2669.3	69.9892	92.7794	163.043	221.719	255.929
2667.37	70.0524	42.7909	63.0524	71.773	55.9741	2667.37	70.0524	92.7909	163.052	221.773	255.974
2665.44	70.1053	42.798	63.0575	71.8337	56.0182	2665.44	70.1053	92.798	163.058	221.834	256.018
2663.51	70.1483	42.8028	63.0601	71.8852	56.0518	2663.51	70.1483	92.8028	163.06	221.885	256.052
2661.58	70.1825	42.805	63.0661	71.9272	56.0858	2661.58	70.1825	92.805	163.066	221.927	256.086
2659.65	70.2143	42.7981	63.0663	71.9609	56.1128	2659.65	70.2143	92.7981	163.066	221.961	256.113
2657.73	70.2585	42.7924	63.0688	71.9952	56.1425	2657.73	70.2585	92.7924	163.069	221.995	256.142
2655.8	70.298	42.7782	63.0659	72.0193	56.1675	2655.8	70.298	92.7782	163.066	222.019	256.167
2653.87	70.3383	42.7564	63.0686	72.0365	56.1962	2653.87	70.3383	92.7564	163.069	222.037	256.196
2651.94	70.3801	42.7217	63.0747	72.0536	56.2288	2651.94	70.3801	92.7217	163.075	222.054	256.229
2650.01	70.4319	42.6887	63.0803	72.0828	56.2714	2650.01	70.4319	92.6887	163.08	222.083	256.271
2648.08	70.4855	42.6443	63.0712	72.1226	56.317	2648.08	70.4855	92.6443	163.071	222.123	256.317
2646.15	70.5511	42.6037	63.0548	72.1739	56.3793	2646.15	70.5511	92.6037	163.055	222.174	256.379
2644.22	70.6209	42.5596	63.0319	72.2249	56.4394	2644.22	70.6209	92.5596	163.032	222.225	256.439
2642.3	70.6906	42.5261	63.001	72.2839	56.5013	2642.3	70.6906	92.5261	163.001	222.284	256.501
2640.37	70.7514	42.497	62.9493	72.3349	56.5597	2640.37	70.7514	92.497	162.949	222.335	256.56
2638.44	70.8081	42.474	62.8901	72.379	56.6117	2638.44	70.8081	92.474	162.89	222.379	256.612
2636.51	70.8593	42.4532	62.8363	72.4131	56.6508	2636.51	70.8593	92.4532	162.836	222.413	256.651
2634.58	70.9032	42.4473	62.7913	72.4225	56.6893	2634.58	70.9032	92.4473	162.791	222.423	256.689
2632.65	70.9478	42.4552	62.7571	72.4126	56.7236	2632.65	70.9478	92.4552	162.757	222.413	256.724
2630.72	70.9957	42.4797	62.7364	72.4043	56.7566	2630.72	70.9957	92.4797	162.736	222.404	256.757
2628.8	71.0278	42.4941	62.7125	72.3901	56.7792	2628.8	71.0278	92.4941	162.713	222.39	256.779
2626.87	71.0584	42.5136	62.6997	72.3875	56.8078	2626.87	71.0584	92.5136	162.7	222.387	256.808
2624.94	71.0853	42.5364	62.6788	72.3863	56.8338	2624.94	71.0853	92.5364	162.679	222.386	256.834
2623.01	71.1248	42.5735	62.6585	72.3954	56.8678	2623.01	71.1248	92.5735	162.658	222.395	256.868
2621.08	71.1679	42.61	62.6383	72.4204	56.8977	2621.08	71.1679	92.61	162.638	222.42	256.898
2619.15	71.2056	42.6463	62.6319	72.4657	56.9256	2619.15	71.2056	92.6463	162.632	222.466	256.926
2617.22	71.2326	42.6724	62.6304	72.5059	56.9526	2617.22	71.2326	92.6724	162.63	222.506	256.953
2615.29	71.2678	42.6985	62.6397	72.5334	56.9812	2615.29	71.2678	92.6985	162.64	222.533	256.981
2613.37	71.2986	42.7239	62.6637	72.5389	57.0074	2613.37	71.2986	92.7239	162.664	222.539	257.007
2611.44	71.332	42.7569	62.7103	72.5531	57.0426	2611.44	71.332	92.7569	162.71	222.553	257.043
2609.51	71.3694	42.7846	62.7762	72.5919	57.0852	2609.51	71.3694	92.7846	162.776	222.592	257.085
2607.58	71.4155	42.8249	62.8547	72.661	57.1438	2607.58	71.4155	92.8249	162.855	222.661	257.144
2605.65	71.4635	42.8721	62.9369	72.7304	57.2085	2605.65	71.4635	92.8721	162.937	222.73	257.208
2603.72	71.5192	42.9324	63.0279	72.7797	57.2694	2603.72	71.5192	92.9324	163.028	222.78	257.269
2601.79	71.5713	42.9877	63.1197	72.8131	57.3287	2601.79	71.5713	92.9877	163.12	222.813	257.329
2599.86	71.6345	43.0473	63.2244	72.8479	57.3951	2599.86	71.6345	93.0473	163.224	222.848	257.395
2597.94	71.7004	43.1026	63.329	72.8686	57.4561	2597.94	71.7004	93.1026	163.329	222.869	257.456
2596.01	71.7746	43.1646	63.4489	72.892	57.5197	2596.01	71.7746	93.1646	163.449	222.892	257.52
2594.08	71.8492	43.2295	63.5683	72.9254	57.5892	2594.08	71.8492	93.2295	163.568	222.925	257.589
2592.15	71.9262	43.3034	63.6947	72.9668	57.6685	2592.15	71.9262	93.3034	163.695	222.967	257.669
2590.22	72.0023	43.3736	63.8274	73.0118	57.7405	2590.22	72.0023	93.3736	163.827	223.012	257.74
2588.29	72.0821	43.4515	63.9486	73.0689	57.8133	2588.29	72.0821	93.4515	163.949	223.069	257.813
2586.36	72.1612	43.5235	64.0641	73.127	57.8879	2586.36	72.1612	93.5235	164.064	223.127	257.888
2584.44	72.2463	43.5889	64.1794	73.1755	57.9684	2584.44	72.2463	93.5889	164.179	223.176	257.968
2582.51	72.3197	43.6458	64.2747	73.2094	58.0459	2582.51	72.3197	93.6458	164.275	223.209	258.046
2580.58	72.3908	43.7064	64.3677	73.2454	58.1241	2580.58	72.3908	93.7064	164.368	223.245	258.124
2578.65	72.4663	43.7636	64.4578	73.2709	58.2022	2578.65	72.4663	93.7636	164.458	223.271	258.202
2576.72	72.5441	43.8259	64.5552	73.291	58.296	2576.72	72.5441	93.8259	164.555	223.291	258.296
2574.79	72.6217	43.886	64.6578	73.3063	58.3963	2574.79	72.6217	93.886	164.658	223.306	258.396
2572.86	72.7048	43.9478	64.7689	73.3221	58.4959	2572.86	72.7048	93.9478	164.769	223.322	258.496
2570.93	72.7879	44.005	64.8773	73.3311	58.5855	2570.93	72.7879	94.005	164.877	223.331	258.585
2569.01	72.8674	44.0687	64.9884	73.3472	58.6737	2569.01	72.8674	94.0687	164.988	223.347	258.674
2567.08	72.935	44.1327	65.09	73.3645	58.7456	2567.08	72.935	94.1327	165.09	223.365	258.746
2565.15	73.0028	44.2094	65.1926	73.3862	58.8144	2565.15	73.0028	94.2094	165.193	223.386	258.814
2563.22	73.0657	44.2925	65.2936	73.4103	58.8824	2563.22	73.0657	94.2925	165.294	223.41	258.882
2561.29	73.1295	44.3936	65.4094	73.4398	58.9544	2561.29	73.1295	94.3936	165.409	223.44	258.954
2559.36	73.1926	44.5015	65.5337	73.4686	59.0212	2559.36	73.1926	94.5015	165.534	223.469	259.021
2557.43	73.2593	44.6132	65.6589	73.4978	59.0909	2557.43	73.2593	94.6132	165.659	223.498	259.091
2555.51	73.3226	44.7154	65.7789	73.5197	59.1665	2555.51	73.3226	94.7154	165.779	223.52	259.166
2553.58	73.3913	44.8171	65.9081	73.5361	59.2422	2553.58	73.3913	94.8171	165.908	223.536	259.242
2551.65	73.4524	44.9123	66.0343	73.5335	59.3095	2551.65	73.4524	94.9123	166.034	223.533	259.309
2549.72	73.519	45.004	66.1556	73.5305	59.378	2549.72	73.519	95.004	166.156	223.53	259.378
2547.79	73.5845	45.0725	66.2612	73.516	59.4327	2547.79	73.5845	95.0725	166.261	223.516	259.433
2545.86	73.6505	45.1343	66.3604	73.5101	59.4839	2545.86	73.6505	95.1343	166.36	223.51	259.484
2543.93	73.706	45.1861	66.4536	73.5138	59.5301	2543.93	73.706	95.1861	166.454	223.514	259.53
2542	73.7559	45.24	66.5454	73.5301	59.5808	2542	73.7559	95.24	166.545	223.53	259.581
2540.08	73.805	45.2872	66.6258	73.552	59.6295	2540.08	73.805	95.2872	166.626	223.552	259.63
2538.15	73.8632	45.3423	66.7061	73.5818	59.6873	2538.15	73.8632	95.3423	166.706	223.582	259.687
2536.22	73.9132	45.3921	66.7792	73.5995	59.7385	2536.22	73.9132	95.3921	166.779	223.6	259.739
2534.29	73.9678	45.4482	66.8491	73.6185	59.7826	2534.29	73.9678	95.4482	166.849	223.619	259.783
2532.36	74.0218	45.4939	66.9097	73.6221	59.8205	2532.36	74.0218	95.4939	166.91	223.622	259.821
2530.43	74.0789	45.5556	66.9709	73.6153	59.8623	2530.43	74.0789	95.5556	166.971	223.615	259.862
2528.5	74.1335	45.6155	67.0308	73.5877	59.9002	2528.5	74.1335	95.6155	167.031	223.588	259.9
2526.57	74.1891	45.6679	67.0962	73.5487	59.9344	2526.57	74.1891	95.6679	167.096	223.549	259.934
2524.65	74.2447	45.7117	67.155	73.4997	59.9694	2524.65	74.2447	95.7117	167.155	223.5	259.969
2522.72	74.3098	45.7617	67.2166	73.4679	60.0275	2522.72	74.3098	95.7617	167.217	223.468	260.028
2520.79	74.369	45.8031	67.2751	73.4388	60.0905	2520.79	74.369	95.8031	167.275	223.439	260.091
2518.86	74.4394	45.8543	67.3351	73.4122	60.1545	2518.86	74.4394	95.8543	167.335	223.412	260.155
2516.93	74.5206	45.9161	67.3951	73.3928	60.225	2516.93	74.5206	95.9161	167.395	223.393	260.225
2515	74.6041	45.9863	67.4515	73.3927	60.3072	2515	74.6041	95.9863	167.452	223.393	260.307
2513.07	74.6768	46.0548	67.4935	73.4099	60.377	2513.07	74.6768	96.0548	167.494	223.41	260.377
2511.15	74.7563	46.1406	67.5366	73.4687	60.4524	2511.15	74.7563	96.1406	167.537	223.469	260.452
2509.22	74.8416	46.2231	67.5801	73.5497	60.5303	2509.22	74.8416	96.2231	167.58	223.55	260.53
2507.29	74.9314	46.3069	67.6325	73.6401	60.6135	2507.29	74.9314	96.3069	167.632	223.64	260.614
2505.36	75.0128	46.3901	67.6788	73.727	60.6885	2505.36	75.0128	96.3901	167.679	223.727	260.689
2503.43	75.094	46.4753	67.7254	73.8063	60.7618	2503.43	75.094	96.4753	167.725	223.806	260.762
2501.5	75.1666	46.5598	67.781	73.8651	60.8303	2501.5	75.1666	96.5598	167.781	223.865	260.83
2499.57	75.2389	46.6543	67.8559	73.9216	60.9023	2499.57	75.2389	96.6543	167.856	223.922	260.902
2497.64	75.3	46.7428	67.9281	73.9578	60.9635	2497.64	75.3	96.7429	167.928	223.958	260.963
2495.72	75.3562	46.8357	68.0056	73.9866	61.0242	2495.72	75.3562	96.8357	168.006	223.987	261.024
2493.79	75.3958	46.9179	68.0838	74.0075	61.0757	2493.79	75.3958	96.9179	168.084	224.007	261.076
2491.86	75.4377	47.0019	68.1706	74.0351	61.1305	2491.86	75.4377	97.0019	168.171	224.035	261.13
2489.93	75.4746	47.0763	68.2484	74.0518	61.1764	2489.93	75.4746	97.0763	168.248	224.052	261.176
2488	75.5144	47.1512	68.326	74.0622	61.2292	2488	75.5144	97.1512	168.326	224.062	261.229
2486.07	75.5519	47.2211	68.3942	74.0614	61.2798	2486.07	75.5519	97.2211	168.394	224.061	261.28
2484.14	75.5955	47.2956	68.4619	74.0727	61.335	2484.14	75.5955	97.2956	168.462	224.073	261.335
2482.22	75.639	47.3703	68.5353	74.0803	61.3873	2482.22	75.639	97.3703	168.535	224.08	261.387
2480.29	75.6925	47.4627	68.6307	74.0964	61.4497	2480.29	75.6925	97.4627	168.631	224.096	261.45
2478.36	75.7471	47.556	68.7246	74.1152	61.513	2478.36	75.7471	97.556	168.725	224.115	261.513
2476.43	75.7981	47.6489	68.8242	74.1343	61.5782	2476.43	75.7981	97.6489	168.824	224.134	261.578
2474.5	75.8372	47.7393	68.922	74.136	61.6308	2474.5	75.8372	97.7393	168.922	224.136	261.631
2472.57	75.8819	47.8378	69.0354	74.1257	61.6877	2472.57	75.8819	97.8378	169.035	224.126	261.688
2470.64	75.927	47.9271	69.1511	74.0961	61.7409	2470.64	75.927	97.9271	169.151	224.096	261.741
2468.71	75.9778	48.0186	69.2696	74.0756	61.8	2468.71	75.9778	98.0186	169.27	224.076	261.8
2466.79	76.0276	48.1062	69.3812	74.0475	61.8643	2466.79	76.0276	98.1062	169.381	224.048	261.864
2464.86	76.0819	48.1973	69.485	74.036	61.9429	2464.86	76.0819	98.1973	169.485	224.036	261.943
2462.93	76.1408	48.2839	69.5747	74.041	62.0225	2462.93	76.1408	98.2839	169.575	224.041	262.022
2461	76.2077	48.3779	69.6664	74.0707	62.1041	2461	76.2077	98.3779	169.666	224.071	262.104
2459.07	76.2645	48.4613	69.7449	74.1075	62.183	2459.07	76.2645	98.4613	169.745	224.107	262.183
2457.14	76.3249	48.5474	69.8222	74.1534	62.2639	2457.14	76.3249	98.5474	169.822	224.153	262.264
2455.21	76.3816	48.6283	69.8917	74.1946	62.3289	2455.21	76.3816	98.6283	169.892	224.195	262.329
2453.29	76.434	48.7102	69.9683	74.2439	62.3958	2453.29	76.434	98.7102	169.968	224.244	262.396
2451.36	76.4871	48.7863	70.05	74.2899	62.4669	2451.36	76.4871	98.7863	170.05	224.29	262.467
2449.43	76.5489	48.8687	70.1456	74.3428	62.5487	2449.43	76.5489	98.8687	170.146	224.343	262.549
2447.5	76.6053	48.9463	70.2343	74.3896	62.6282	2447.5	76.6053	98.9463	170.234	224.39	262.628
2445.57	76.6692	49.0372	70.3269	74.4433	62.7179	2445.57	76.6692	99.0372	170.327	224.443	262.718
2443.64	76.7264	49.1209	70.4133	74.4785	62.8066	2443.64	76.7264	99.1209	170.413	224.478	262.807
2441.71	76.7811	49.2023	70.4965	74.5086	62.8833	2441.71	76.7811	99.2023	170.496	224.509	262.883
2439.78	76.8351	49.2817	70.5791	74.5307	62.9529	2439.78	76.8351	99.2817	170.579	224.531	262.953
2437.86	76.8974	49.3718	70.6764	74.5617	63.0368	2437.86	76.8974	99.3718	170.676	224.562	263.037
2435.93	76.9596	49.4564	70.7695	74.5846	63.1154	2435.93	76.9596	99.4564	170.77	224.585	263.115
2434	77.0259	49.5461	70.8622	74.6145	63.1949	2434	77.0259	99.5461	170.862	224.614	263.195
2432.07	77.0923	49.6242	70.9505	74.635	63.273	2432.07	77.0923	99.6242	170.951	224.635	263.273
2430.14	77.1637	49.7071	71.0429	74.6633	63.3545	2430.14	77.1637	99.7071	171.043	224.663	263.354
2428.21	77.2165	49.7798	71.116	74.6881	63.4245	2428.21	77.2165	99.7798	171.116	224.688	263.424
2426.28	77.2735	49.8589	71.1917	74.7262	63.4913	2426.28	77.2735	99.8589	171.192	224.726	263.491
2424.35	77.3353	49.9439	71.2681	74.7612	63.5478	2424.35	77.3353	99.9439	171.268	224.761	263.548
2422.43	77.398	50.0382	71.3492	74.8008	63.6011	2422.43	77.398	100.038	171.349	224.801	263.601
2420.5	77.4484	50.1176	71.4179	74.8168	63.6318	2420.5	77.4484	100.118	171.418	224.817	263.632
2418.57	77.4988	50.1988	71.4855	74.8207	63.6606	2418.57	77.4988	100.199	171.485	224.821	263.661
2416.64	77.5442	50.2671	71.5429	74.7943	63.6839	2416.64	77.5442	100.267	171.543	224.794	263.684
2414.71	77.5987	50.3341	71.6131	74.7615	63.7173	2414.71	77.5987	100.334	171.613	224.762	263.717
2412.78	77.6468	50.3906	71.6748	74.7167	63.7569	2412.78	77.6468	100.391	171.675	224.717	263.757
2410.85	77.7034	50.4548	71.7403	74.6931	63.8025	2410.85	77.7034	100.455	171.74	224.693	263.803
2408.93	77.7647	50.5099	71.7886	74.6978	63.8504	2408.93	77.7647	100.51	171.789	224.698	263.85
2407	77.8341	50.5751	71.8417	74.7407	63.9128	2407	77.8341	100.575	171.842	224.741	263.913
2405.07	77.8946	50.6439	71.8808	74.7651	63.9703	2405.07	77.8946	100.644	171.881	224.765	263.97
2403.14	77.9586	50.727	71.9319	74.7858	64.0275	2403.14	77.9586	100.727	171.932	224.786	264.027
2401.21	78.0196	50.8018	71.985	74.7935	64.0783	2401.21	78.0196	100.802	171.985	224.793	264.078
2399.28	78.0865	50.8904	72.0553	74.8068	64.1291	2399.28	78.0865	100.89	172.055	224.807	264.129
2397.35	78.151	50.9798	72.1334	74.818	64.1792	2397.35	78.151	100.98	172.133	224.818	264.179
2395.42	78.2205	51.0794	72.2264	74.8372	64.2409	2395.42	78.2205	101.079	172.226	224.837	264.241
2393.5	78.2848	51.1636	72.2987	74.8443	64.2931	2393.5	78.2848	101.164	172.299	224.844	264.293
2391.57	78.3386	51.2419	72.3582	74.851	64.3407	2391.57	78.3386	101.242	172.358	224.851	264.341
2389.64	78.3282	51.2667	72.3607	74.8222	64.3568	2389.64	78.3282	101.267	172.361	224.822	264.357
2387.71	78.1712	51.1634	72.2571	74.7217	64.3153	2387.71	78.1712	101.163	172.257	224.722	264.315
2385.78	77.6998	50.7779	71.9568	74.4842	64.1819	2385.78	77.6998	100.778	171.957	224.484	264.182
2383.85	76.7796	50.0114	71.4117	74.1421	63.9844	2383.85	76.7796	100.011	171.412	224.142	263.984
2381.92	75.3835	48.8419	70.6623	73.7819	63.8053	2381.92	75.3835	98.8419	170.662	223.782	263.805
2380	73.7243	47.4731	69.8955	73.5997	63.8063	2380	73.7243	97.4731	169.896	223.6	263.806
2378.07	72.0217	46.0787	69.2632	73.7101	64.0784	2378.07	72.0217	96.0787	169.263	223.71	264.078
2376.14	70.287	44.6595	68.809	74.1028	64.6237	2376.14	70.287	94.6595	168.809	224.103	264.624
2374.21	68.3545	43.1009	68.388	74.659	65.336	2374.21	68.3545	93.1009	168.388	224.659	265.336
2372.28	66.2948	41.4732	67.9809	75.4507	66.246	2372.28	66.2948	91.4732	167.981	225.451	266.246
2370.35	64.1715	39.7833	67.5937	76.3836	67.3101	2370.35	64.1715	89.7833	167.594	226.384	267.31
2368.42	62.1579	38.1914	67.2722	77.3842	68.4528	2368.42	62.1579	88.1914	167.272	227.384	268.453
2366.49	60.3185	36.7243	66.9931	78.3668	69.6019	2366.49	60.3185	86.7243	166.993	228.367	269.602
2364.57	58.8193	35.5751	66.8335	79.2725	70.637	2364.57	58.8193	85.5751	166.833	229.272	270.637
2362.64	57.7758	34.7535	66.8008	79.961	71.4774	2362.64	57.7758	84.7535	166.801	229.961	271.477
2360.71	57.3253	34.4084	66.8768	80.3731	72.0205	2360.71	57.3253	84.4084	166.877	230.373	272.021
2358.78	57.389	34.3844	66.9819	80.4255	72.2045	2358.78	57.389	84.3844	166.982	230.425	272.205
2356.85	58.3397	35.1012	67.3966	80.206	72.059	2356.85	58.3397	85.1012	167.397	230.206	272.059
2354.92	60.1303	36.4882	67.9807	79.5355	71.4423	2354.92	60.1303	86.4882	167.981	229.535	271.442
2352.99	62.5268	38.3545	68.655	78.6264	70.5325	2352.99	62.5268	88.3545	168.655	228.626	270.533
2351.06	65.2808	40.5077	69.2494	77.371	69.2751	2351.06	65.2808	90.5077	169.249	227.371	269.275
2349.14	67.3667	42.5231	69.4528	76.3322	67.8676	2349.14	67.3667	92.5231	169.453	226.332	267.868
2347.21	66.6559	42.3536	68.6751	76.1139	67.0909	2347.21	66.6559	92.3536	168.675	226.114	267.091
2345.28	64.1077	40.1812	67.9817	76.9434	68.0593	2345.28	64.1077	90.1812	167.982	226.943	268.059
2343.35	62.7609	38.9421	68.3642	78.264	69.8201	2343.35	62.7609	88.9421	168.364	228.264	269.82
2341.42	62.6671	38.9122	68.9343	79.1605	70.8092	2341.42	62.6671	88.9122	168.934	229.161	270.809
2339.49	63.1954	39.3854	69.3733	79.4216	71.1114	2339.49	63.1954	89.3854	169.373	229.422	271.111
2337.56	63.6349	39.7877	69.615	79.4065	71.1081	2337.56	63.6349	89.7877	169.615	229.406	271.108
2335.64	64.0231	40.1101	69.6965	79.1299	70.8539	2335.64	64.0231	90.1101	169.696	229.13	270.854
2333.71	64.3425	40.4067	69.5983	78.6163	70.3707	2333.71	64.3425	90.4067	169.598	228.616	270.371
2331.78	64.297	40.3438	69.1897	77.8934	69.789	2331.78	64.297	90.3438	169.19	227.893	269.789
2329.85	64.5774	40.5008	69.1353	77.4164	69.4834	2329.85	64.5774	90.5008	169.135	227.416	269.483
2327.92	65.2669	41.0427	69.3206	77.0397	69.1739	2327.92	65.2669	91.0427	169.321	227.04	269.174
2325.99	66.0126	41.6931	69.4175	76.5678	68.6829	2325.99	66.0126	91.6931	169.418	226.568	268.683
2324.06	66.5387	42.1503	69.2846	75.8918	68.0514	2324.06	66.5387	92.1503	169.285	225.892	268.051
2322.13	67.1614	42.6443	69.3205	75.372	67.6531	2322.13	67.1614	92.6443	169.32	225.372	267.653
2320.21	68.2259	43.5254	69.6567	75.0229	67.3458	2320.21	68.2259	93.5254	169.657	225.023	267.346
2318.28	69.6159	44.7309	70.1979	74.784	67.0699	2318.28	69.6159	94.7309	170.198	224.784	267.07
2316.35	70.8154	45.8294	70.5965	74.5363	66.7296	2316.35	70.8154	95.8294	170.596	224.536	266.73
2314.42	71.5177	46.4993	70.7002	74.2399	66.357	2314.42	71.5177	96.4993	170.7	224.24	266.357
2312.49	71.8941	46.798	70.6691	73.9432	66.0714	2312.49	71.8941	96.798	170.669	223.943	266.071
2310.56	72.4284	47.2439	70.8409	73.8295	65.9468	2310.56	72.4284	97.2439	170.841	223.829	265.947
2308.63	73.191	47.9512	71.1761	73.8459	65.8632	2308.63	73.191	97.9512	171.176	223.846	265.863
2306.71	74.1046	48.8009	71.6066	73.9848	65.8522	2306.71	74.1046	98.8009	171.607	223.985	265.852
2304.78	75.0124	49.6676	72.0625	74.1925	65.8922	2304.78	75.0124	99.6676	172.062	224.192	265.892
2302.85	75.6715	50.3357	72.4456	74.4147	65.9598	2302.85	75.6715	100.336	172.446	224.415	265.96
2300.92	76.1229	50.7883	72.7125	74.577	66.0187	2300.92	76.1229	100.788	172.712	224.577	266.019
2298.99	76.6095	51.2759	72.9997	74.7559	66.1156	2298.99	76.6095	101.276	173	224.756	266.116
2297.06	77.077	51.7488	73.265	74.9225	66.2139	2297.06	77.077	101.749	173.265	224.923	266.214
2295.13	77.5241	52.206	73.5415	75.0957	66.3417	2295.13	77.5241	102.206	173.541	225.096	266.342
2293.2	77.969	52.6545	73.8152	75.2374	66.4596	2293.2	77.969	102.654	173.815	225.237	266.46
2291.28	78.4191	53.1044	74.0889	75.3646	66.5715	2291.28	78.4191	103.104	174.089	225.365	266.571
2289.35	78.8182	53.5074	74.3227	75.4419	66.6507	2289.35	78.8182	103.507	174.323	225.442	266.651
2287.42	79.1988	53.8933	74.5355	75.4964	66.7055	2287.42	79.1988	103.893	174.536	225.496	266.706
2285.49	79.5495	54.2528	74.7021	75.4973	66.7091	2285.49	79.5495	104.253	174.702	225.497	266.709
2283.56	79.806	54.5427	74.8232	75.493	66.7033	2283.56	79.806	104.543	174.823	225.493	266.703
2281.63	79.8567	54.6432	74.8656	75.4905	66.7096	2281.63	79.8567	104.643	174.866	225.491	266.71
2279.7	79.7988	54.6365	74.8909	75.526	66.7628	2279.7	79.7988	104.636	174.891	225.526	266.763
2277.77	79.7442	54.6236	74.9152	75.549	66.8136	2277.77	79.7442	104.624	174.915	225.549	266.814
2275.85	79.7255	54.6387	74.961	75.5859	66.8691	2275.85	79.7255	104.639	174.961	225.586	266.869
2273.92	79.7281	54.6693	75.0047	75.6196	66.9154	2273.92	79.7281	104.669	175.005	225.62	266.915
2271.99	79.7546	54.7256	75.0635	75.6759	66.9731	2271.99	79.7546	104.726	175.063	225.676	266.973
2270.06	79.7871	54.7849	75.1081	75.7178	67.0141	2270.06	79.7871	104.785	175.108	225.718	267.014
2268.13	79.8404	54.8602	75.1575	75.7651	67.0585	2268.13	79.8404	104.86	175.158	225.765	267.058
2266.2	79.8865	54.9327	75.186	75.7788	67.0899	2266.2	79.8865	104.933	175.186	225.779	267.09
2264.27	79.9484	55.024	75.2107	75.794	67.1292	2264.27	79.9484	105.024	175.211	225.794	267.129
2262.35	80.0207	55.1155	75.2246	75.7981	67.1533	2262.35	80.0207	105.115	175.225	225.798	267.153
2260.42	80.0987	55.2183	75.2529	75.818	67.1845	2260.42	80.0987	105.218	175.253	225.818	267.185
2258.49	80.1705	55.3171	75.2706	75.8269	67.2012	2258.49	80.1705	105.317	175.271	225.827	267.201
2256.56	80.2534	55.4233	75.3035	75.8659	67.2244	2256.56	80.2534	105.423	175.303	225.866	267.224
2254.63	80.3288	55.5167	75.34	75.9031	67.2336	2254.63	80.3288	105.517	175.34	225.903	267.234
2252.7	80.419	55.619	75.404	75.9543	67.251	2252.7	80.419	105.619	175.404	225.954	267.251
2250.77	80.4964	55.7094	75.4502	75.987	67.2535	2250.77	80.4964	105.709	175.45	225.987	267.254
2248.84	80.5769	55.8099	75.5048	76.029	67.2629	2248.84	80.5769	105.81	175.505	226.029	267.263
2246.92	80.6444	55.8901	75.5371	76.0324	67.259	2246.92	80.6444	105.89	175.537	226.032	267.259
2244.99	80.7103	55.976	75.58	76.0444	67.2779	2244.99	80.7103	105.976	175.58	226.044	267.278
2243.06	80.7608	56.0537	75.6108	76.0614	67.296	2243.06	80.7608	106.054	175.611	226.061	267.296
2241.13	80.8183	56.1409	75.6597	76.1248	67.3483	2241.13	80.8183	106.141	175.66	226.125	267.348
2239.2	80.8599	56.2179	75.6975	76.1756	67.4076	2239.2	80.8599	106.218	175.698	226.176	267.408
2237.27	80.9065	56.3104	75.7535	76.2404	67.4824	2237.27	80.9065	106.31	175.753	226.24	267.482
2235.34	80.942	56.3852	75.8102	76.2927	67.5419	2235.34	80.942	106.385	175.81	226.293	267.542
2233.42	80.9831	56.4631	75.8812	76.3599	67.6071	2233.42	80.9831	106.463	175.881	226.36	267.607
2231.49	81.0104	56.5255	75.9266	76.3983	67.6514	2231.49	81.0104	106.525	175.927	226.398	267.651
2229.56	81.0423	56.5926	75.9763	76.4475	67.6918	2229.56	81.0423	106.593	175.976	226.448	267.692
2227.63	81.0608	56.6455	76.0068	76.4798	67.7129	2227.63	81.0608	106.646	176.007	226.48	267.713
2225.7	81.0879	56.7019	76.0466	76.5242	67.7413	2225.7	81.0879	106.702	176.047	226.524	267.741
2223.77	81.0972	56.7415	76.0601	76.545	67.7434	2223.77	81.0972	106.741	176.06	226.545	267.743
2221.84	81.1124	56.7872	76.0824	76.5812	67.7517	2221.84	81.1124	106.787	176.082	226.581	267.752
2219.91	81.1193	56.8227	76.0965	76.5971	67.7469	2219.91	81.1193	106.823	176.097	226.597	267.747
2217.99	81.127	56.8688	76.1315	76.623	67.7528	2217.99	81.127	106.869	176.131	226.623	267.753
2216.06	81.1177	56.8977	76.1557	76.6307	67.7528	2216.06	81.1177	106.898	176.156	226.631	267.753
2214.13	81.1211	56.9344	76.1947	76.646	67.7695	2214.13	81.1211	106.934	176.195	226.646	267.769
2212.2	81.1198	56.9589	76.2157	76.6411	67.7761	2212.2	81.1198	106.959	176.216	226.641	267.776
2210.27	81.1278	56.9939	76.2423	76.6549	67.8093	2210.27	81.1278	106.994	176.242	226.655	267.809
2208.34	81.1239	57.0104	76.2435	76.6504	67.8325	2208.34	81.1239	107.01	176.243	226.65	267.832
2206.41	81.1313	57.0337	76.2422	76.6583	67.8626	2206.41	81.1313	107.034	176.242	226.658	267.863
2204.48	81.129	57.0488	76.2279	76.6499	67.8892	2204.48	81.129	107.049	176.228	226.65	267.889
2202.56	81.1382	57.0831	76.2443	76.6642	67.9267	2202.56	81.1382	107.083	176.244	226.664	267.927
2200.63	81.1434	57.1085	76.2543	76.6544	67.9401	2200.63	81.1434	107.108	176.254	226.654	267.94
2198.7	81.1469	57.1473	76.2725	76.657	67.9516	2198.7	81.1469	107.147	176.273	226.657	267.952
2196.77	81.1317	57.1748	76.2849	76.6459	67.9418	2196.77	81.1317	107.175	176.285	226.646	267.942
2194.84	81.1257	57.217	76.3216	76.6562	67.9353	2194.84	81.1257	107.217	176.322	226.656	267.935
2192.91	81.1195	57.2549	76.3431	76.653	67.9166	2192.91	81.1195	107.255	176.343	226.653	267.917
2190.98	81.1276	57.3145	76.3738	76.6799	67.9199	2190.98	81.1276	107.314	176.374	226.68	267.92
2189.06	81.1286	57.3684	76.3866	76.7025	67.9238	2189.06	81.1286	107.368	176.387	226.702	267.924
2187.13	81.1399	57.4334	76.4007	76.7411	67.9389	2187.13	81.1399	107.433	176.401	226.741	267.939
2185.2	81.1539	57.4848	76.4078	76.775	67.9525	2185.2	81.1539	107.485	176.408	226.775	267.953
2183.27	81.175	57.5407	76.4307	76.8388	67.9893	2183.27	81.175	107.541	176.431	226.839	267.989
2181.34	81.1728	57.5704	76.4336	76.8739	68.0135	2181.34	81.1728	107.57	176.434	226.874	268.013
2179.41	81.1753	57.6063	76.4604	76.9274	68.0549	2179.41	81.1753	107.606	176.46	226.927	268.055
2177.48	81.166	57.6297	76.4969	76.9694	68.092	2177.48	81.166	107.63	176.497	226.969	268.092
2175.55	81.1664	57.6734	76.5557	77.0356	68.1475	2175.55	81.1664	107.673	176.556	227.036	268.147
2173.63	81.1554	57.7053	76.5904	77.0702	68.1851	2173.63	81.1554	107.705	176.59	227.07	268.185
2171.7	81.1495	57.7559	76.6237	77.1178	68.2225	2171.7	81.1495	107.756	176.624	227.118	268.223
2169.77	81.1438	57.8017	76.6354	77.1501	68.2496	2169.77	81.1438	107.802	176.635	227.15	268.25
2167.84	81.1613	57.8684	76.6578	77.2013	68.2899	2167.84	81.1613	107.868	176.658	227.201	268.29
2165.91	81.1731	57.9207	76.6541	77.2202	68.2951	2165.91	81.1731	107.921	176.654	227.22	268.295
2163.98	81.1943	57.9763	76.6615	77.2486	68.2962	2163.98	81.1943	107.976	176.661	227.249	268.296
2162.05	81.2094	58.0136	76.6603	77.2413	68.2838	2162.05	81.2094	108.014	176.66	227.241	268.284
2160.13	81.2506	58.0803	76.7152	77.2841	68.3182	2160.13	81.2506	108.08	176.715	227.284	268.318
2158.2	81.2858	58.1369	76.7714	77.3194	68.3504	2158.2	81.2858	108.137	176.771	227.319	268.35
2156.27	81.3268	58.1989	76.8375	77.3603	68.3995	2156.27	81.3268	108.199	176.838	227.36	268.4
2154.34	81.3542	58.248	76.8806	77.3771	68.439	2154.34	81.3542	108.248	176.881	227.377	268.439
2152.41	81.3847	58.3135	76.9259	77.4153	68.4925	2152.41	81.3847	108.314	176.926	227.415	268.493
2150.48	81.399	58.3732	76.9412	77.4313	68.5381	2150.48	81.399	108.373	176.941	227.431	268.538
2148.55	81.4162	58.4459	76.9569	77.4645	68.5906	2148.55	81.4162	108.446	176.957	227.465	268.591
2146.62	81.4171	58.4878	76.9458	77.4656	68.6177	2146.62	81.4171	108.488	176.946	227.466	268.618
2144.7	81.4309	58.5431	76.9621	77.4944	68.656	2144.7	81.4309	108.543	176.962	227.494	268.656
2142.77	81.4338	58.5853	76.9716	77.5116	68.6838	2142.77	81.4338	108.585	176.972	227.512	268.684
2140.84	81.4397	58.6245	76.986	77.5256	68.6962	2140.84	81.4397	108.625	176.986	227.526	268.696
2138.91	81.4272	58.6362	76.9768	77.4985	68.6665	2138.91	81.4272	108.636	176.977	227.499	268.667
2136.98	81.425	58.6585	76.984	77.4885	68.64	2136.98	81.425	108.659	176.984	227.489	268.64
2135.05	81.4166	58.6753	76.9943	77.4974	68.6318	2135.05	81.4166	108.675	176.994	227.497	268.632
2133.12	81.4298	58.726	77.0462	77.5759	68.6748	2133.12	81.4298	108.726	177.046	227.576	268.675
2131.19	81.428	58.7464	77.0541	77.596	68.677	2131.19	81.428	108.746	177.054	227.596	268.677
2129.27	81.4364	58.7825	77.085	77.6365	68.6942	2129.27	81.4364	108.782	177.085	227.637	268.694
2127.34	81.4317	58.8058	77.0812	77.6442	68.7002	2127.34	81.4317	108.806	177.081	227.644	268.7
2125.41	81.4402	58.8529	77.097	77.6783	68.7411	2125.41	81.4402	108.853	177.097	227.678	268.741
2123.48	81.438	58.8818	77.098	77.6868	68.7716	2123.48	81.438	108.882	177.098	227.687	268.772
2121.55	81.4588	58.9346	77.1271	77.7254	68.8262	2121.55	81.4588	108.935	177.127	227.725	268.826
2119.62	81.4575	58.963	77.1305	77.7272	68.8514	2119.62	81.4575	108.963	177.13	227.727	268.851
2117.69	81.4656	59.0108	77.147	77.7496	68.8831	2117.69	81.4656	109.011	177.147	227.75	268.883
2115.77	81.4442	59.0071	77.099	77.6873	68.8401	2115.77	81.4442	109.007	177.099	227.687	268.84
2113.84	81.4446	59.0307	77.1167	77.7045	68.8644	2113.84	81.4446	109.031	177.117	227.704	268.864
2111.91	81.4389	59.066	77.1451	77.7529	68.9012	2111.91	81.4389	109.066	177.145	227.753	268.901
2109.98	81.4371	59.1032	77.1715	77.7934	68.9195	2109.98	81.4371	109.103	177.172	227.793	268.92
2108.05	81.4113	59.1145	77.1596	77.787	68.9014	2108.05	81.4113	109.114	177.16	227.787	268.901
2106.12	81.3935	59.1484	77.1621	77.8162	68.8993	2106.12	81.3935	109.148	177.162	227.816	268.899
2104.19	81.37	59.1677	77.1441	77.8361	68.8992	2104.19	81.37	109.168	177.144	227.836	268.899
2102.26	81.3698	59.2059	77.1476	77.8696	68.9105	2102.26	81.3698	109.206	177.148	227.87	268.91
2100.34	81.3654	59.2239	77.1283	77.8743	68.9164	2100.34	81.3654	109.224	177.128	227.874	268.916
2098.41	81.3838	59.2626	77.1292	77.9026	68.9582	2098.41	81.3838	109.263	177.129	227.903	268.958
2096.48	81.3907	59.2866	77.1215	77.9075	68.9948	2096.48	81.3907	109.287	177.121	227.907	268.995
2094.55	81.4123	59.3237	77.1345	77.9238	69.0436	2094.55	81.4123	109.324	177.135	227.924	269.044
2092.62	81.412	59.3297	77.1035	77.8745	69.0414	2092.62	81.412	109.33	177.103	227.874	269.041
2090.69	81.3878	59.3053	77.0205	77.746	68.9663	2090.69	81.3878	109.305	177.021	227.746	268.966
2088.76	81.3825	59.304	77.0087	77.7191	68.9919	2088.76	81.3825	109.304	177.009	227.719	268.992
2086.84	81.413	59.3723	77.087	77.8481	69.1031	2086.84	81.413	109.372	177.087	227.848	269.103
2084.91	81.3969	59.3867	77.0869	77.8859	69.1279	2084.91	81.3969	109.387	177.087	227.886	269.128
2082.98	81.3741	59.4055	77.083	77.9205	69.139	2082.98	81.3741	109.406	177.083	227.92	269.139
2081.05	81.3298	59.3952	77.0465	77.8969	69.1067	2081.05	81.3298	109.395	177.047	227.897	269.107
2079.12	81.2982	59.4028	77.0319	77.9011	69.0922	2079.12	81.2982	109.403	177.032	227.901	269.092
2077.19	81.2575	59.3856	76.9852	77.8835	69.0591	2077.19	81.2575	109.386	176.985	227.884	269.059
2075.26	81.2791	59.439	77.0057	77.9327	69.0725	2075.26	81.2791	109.439	177.006	227.933	269.073
2073.33	81.2916	59.482	77.0073	77.9293	69.0621	2073.33	81.2916	109.482	177.007	227.929	269.062
2071.41	81.3233	59.5597	77.0588	77.9875	69.1129	2071.41	81.3233	109.56	177.059	227.987	269.113
2069.48	81.3325	59.6018	77.0632	77.9739	69.1225	2069.48	81.3325	109.602	177.063	227.974	269.122
2067.55	81.3358	59.6374	77.0236	77.9046	69.0751	2067.55	81.3358	109.637	177.024	227.905	269.075
2065.62	81.2591	59.5386	76.8073	77.5875	68.8383	2065.62	81.2591	109.539	176.807	227.588	268.838
2063.69	81.3028	59.6076	76.8907	77.6779	68.9773	2063.69	81.3028	109.608	176.891	227.678	268.977
2061.76	81.3528	59.7568	77.0308	77.9334	69.1944	2061.76	81.3528	109.757	177.031	227.933	269.194
2059.83	81.3584	59.8171	77.0466	78.0091	69.2431	2059.83	81.3584	109.817	177.047	228.009	269.243
2057.9	81.3613	59.8624	77.0672	78.0687	69.2958	2057.9	81.3613	109.862	177.067	228.069	269.296
2055.98	81.364	59.9135	77.0805	78.1072	69.3172	2055.98	81.364	109.913	177.08	228.107	269.317
2054.05	81.3295	59.9091	77.0282	78.0649	69.2834	2054.05	81.3295	109.909	177.028	228.065	269.283
2052.12	81.3423	59.9626	77.0634	78.1067	69.2939	2052.12	81.3423	109.963	177.063	228.107	269.294
2050.19	81.3453	59.9986	77.0807	78.1281	69.2871	2050.19	81.3453	109.999	177.081	228.128	269.287
2048.26	81.4054	60.0659	77.1482	78.1995	69.3168	2048.26	81.4054	110.066	177.148	228.2	269.317
2046.33	81.4348	60.0883	77.1443	78.2061	69.3129	2046.33	81.4348	110.088	177.144	228.206	269.313
2044.4	81.4548	60.1078	77.1214	78.1991	69.3062	2044.4	81.4548	110.108	177.121	228.199	269.306
2042.48	81.381	60.0162	76.9302	77.9681	69.1398	2042.48	81.381	110.016	176.93	227.968	269.14
2040.55	81.3691	59.9965	76.8935	77.9102	69.1543	2040.55	81.3691	109.996	176.893	227.91	269.154
2038.62	81.4054	60.092	77.011	78.1151	69.3782	2038.62	81.4054	110.092	177.011	228.115	269.378
2036.69	81.3705	60.1138	76.9879	78.16	69.4469	2036.69	81.3705	110.114	176.988	228.16	269.447
2034.76	81.1965	59.9895	76.755	77.9969	69.3806	2034.76	81.1965	109.989	176.755	227.997	269.381
2032.83	80.9924	59.8662	76.4853	77.8201	69.2926	2032.83	80.9924	109.866	176.485	227.82	269.293
2030.9	80.5738	59.5887	75.9153	77.4699	69.0672	2030.9	80.5738	109.589	175.915	227.47	269.067
2028.97	79.6669	58.9595	74.6606	76.7245	68.5119	2028.97	79.6669	108.959	174.661	226.725	268.512
2027.05	78.1977	57.778	72.6001	75.3783	67.5355	2027.05	78.1977	107.778	172.6	225.378	267.536
2025.12	78.198	57.7368	72.5918	75.3516	67.5081	2025.12	78.198	107.737	172.592	225.352	267.508
2023.19	79.6707	58.9594	74.5782	76.6645	68.4114	2023.19	79.6707	108.959	174.578	226.664	268.411
2021.26	80.7658	59.8338	76.0054	77.6381	69.0619	2021.26	80.7658	109.834	176.005	227.638	269.062
2019.33	81.3852	60.2198	76.7077	77.9743	69.2296	2019.33	81.3852	110.22	176.708	227.974	269.23
2017.4	81.5635	60.2203	76.8158	77.798	69.0724	2017.4	81.5635	110.22	176.816	227.798	269.072
2015.47	81.7283	60.377	77.1721	78.1479	69.4421	2015.47	81.7283	110.377	177.172	228.148	269.442
2013.55	81.8487	60.6251	77.5107	78.6328	69.8274	2013.55	81.8487	110.625	177.511	228.633	269.827
2011.62	81.8568	60.6572	77.563	78.6822	69.863	2011.62	81.8568	110.657	177.563	228.682	269.863
2009.69	81.8523	60.6531	77.5632	78.6511	69.8575	2009.69	81.8523	110.653	177.563	228.651	269.858
2007.76	81.8488	60.6338	77.5495	78.584	69.8378	2007.76	81.8488	110.634	177.55	228.584	269.838
2005.83	81.877	60.6885	77.5872	78.6269	69.901	2005.83	81.877	110.689	177.587	228.627	269.901
2003.9	81.9117	60.7269	77.5838	78.6293	69.9259	2003.9	81.9117	110.727	177.584	228.629	269.926
2001.97	81.9683	60.7829	77.5826	78.6443	69.9412	2001.97	81.9683	110.783	177.583	228.644	269.941
2000.04	82.0226	60.8052	77.557	78.5918	69.896	2000.04	82.0226	110.805	177.557	228.592	269.896
1998.12	82.0961	60.862	77.587	78.5979	69.8975	1998.12	82.0961	110.862	177.587	228.598	269.897
1996.19	82.1673	60.9238	77.6483	78.5862	69.8985	1996.19	82.1673	110.924	177.648	228.586	269.898
1994.26	82.0836	60.8415	77.3912	78.1418	69.4894	1994.26	82.0836	110.841	177.391	228.142	269.489
1992.33	81.8643	60.458	76.835	77.1625	68.7584	1992.33	81.8643	110.458	176.835	227.162	268.758
1990.4	81.9897	60.6097	77.1259	77.301	69.0962	1990.4	81.9897	110.61	177.126	227.301	269.096
1988.47	82.1157	60.8813	77.4011	77.5801	69.3789	1988.47	82.1157	110.881	177.401	227.58	269.379
1986.54	82.2242	61.0401	77.5886	77.8507	69.6515	1986.54	82.2242	111.04	177.589	227.851	269.652
1984.62	82.3259	61.1966	77.7434	78.1979	69.9168	1984.62	82.3259	111.197	177.743	228.198	269.917
1982.69	82.361	61.2246	77.7288	78.3353	69.9901	1982.69	82.361	111.225	177.729	228.335	269.99
1980.76	82.3967	61.2381	77.71	78.4366	70.06	1980.76	82.3967	111.238	177.71	228.437	270.06
1978.83	82.4299	61.2528	77.6918	78.513	70.1024	1978.83	82.4299	111.253	177.692	228.513	270.102
1976.9	82.4561	61.2551	77.6842	78.5307	70.108	1976.9	82.4561	111.255	177.684	228.531	270.108
1974.97	82.4876	61.2665	77.7024	78.5311	70.1075	1974.97	82.4876	111.266	177.702	228.531	270.108
1973.04	82.5129	61.2793	77.7296	78.5018	70.0915	1973.04	82.5129	111.279	177.73	228.502	270.092
1971.11	82.5215	61.2834	77.7343	78.4357	70.0439	1971.11	82.5215	111.283	177.734	228.436	270.044
1969.19	82.4084	61.1161	77.4346	77.9542	69.6236	1969.19	82.4084	111.116	177.435	227.954	269.624
1967.26	82.2378	60.7774	76.9703	77.1651	69.0393	1967.26	82.2378	110.777	176.97	227.165	269.039
1965.33	82.382	60.9702	77.2976	77.4361	69.4445	1965.33	82.382	110.97	177.298	227.436	269.444
1963.4	82.5229	61.3339	77.643	77.8389	69.8032	1963.4	82.5229	111.334	177.643	227.839	269.803
1961.47	82.5196	61.3732	77.6109	77.6497	69.7267	1961.47	82.5196	111.373	177.611	227.65	269.727
1959.54	82.5371	61.4382	77.6519	77.5872	69.7566	1959.54	82.5371	111.438	177.652	227.587	269.757
1957.61	82.5431	61.4802	77.6679	77.6183	69.7847	1957.61	82.5431	111.48	177.668	227.618	269.785
1955.68	82.5329	61.4752	77.6169	77.6933	69.7566	1955.68	82.5329	111.475	177.617	227.693	269.757
1953.76	82.5625	61.5017	77.6752	77.9475	69.8979	1953.76	82.5625	111.502	177.675	227.948	269.898
1951.83	82.6279	61.6213	77.7861	78.3061	70.0931	1951.83	82.6279	111.621	177.786	228.306	270.093
1949.9	82.647	61.6262	77.7528	78.4343	70.139	1949.9	82.647	111.626	177.753	228.434	270.139
1947.97	82.6391	61.5856	77.6222	78.4082	70.0514	1947.97	82.6391	111.586	177.622	228.408	270.051
1946.04	82.5682	61.4133	77.3488	78.1026	69.7803	1946.04	82.5682	111.413	177.349	228.103	269.78
1944.11	82.3628	61.0986	76.7782	77.3488	69.0899	1944.11	82.3628	111.099	176.778	227.349	269.09
1942.18	82.2278	60.7085	76.3773	76.6108	68.6353	1942.18	82.2278	110.709	176.377	226.611	268.635
1940.26	82.6065	61.2948	77.2767	77.6563	69.6843	1940.26	82.6065	111.295	177.277	227.656	269.684
1938.33	82.7468	61.6932	77.6509	78.1619	70.0044	1938.33	82.7468	111.693	177.651	228.162	270.004
1936.4	82.7689	61.7487	77.7119	78.1622	70.0051	1936.4	82.7689	111.749	177.712	228.162	270.005
1934.47	82.7549	61.7406	77.6828	78.0584	69.9242	1934.47	82.7549	111.741	177.683	228.058	269.924
1932.54	82.7779	61.7774	77.7293	78.0457	69.9511	1932.54	82.7779	111.777	177.729	228.046	269.951
1930.61	82.8014	61.8348	77.7867	78.0105	69.992	1930.61	82.8014	111.835	177.787	228.011	269.992
1928.68	82.8404	61.9058	77.8638	77.9875	70.0615	1928.68	82.8404	111.906	177.864	227.988	270.062
1926.75	82.832	61.9145	77.8347	77.9459	70.0387	1926.75	82.832	111.914	177.835	227.946	270.039
1924.83	82.6577	61.7051	77.3966	77.5308	69.5448	1924.83	82.6577	111.705	177.397	227.531	269.545
1922.9	82.3707	61.1444	76.6643	76.6531	68.7697	1922.9	82.3707	111.144	176.664	226.653	268.77
1920.97	82.5883	61.4682	77.1693	77.4372	69.4602	1920.97	82.5883	111.468	177.169	227.437	269.46
1919.04	82.4927	61.4863	76.9544	77.3928	69.1535	1919.04	82.4927	111.486	176.954	227.393	269.154
1917.11	82.5825	61.357	77.0715	77.4275	69.3706	1917.11	82.5825	111.357	177.071	227.428	269.371
1915.18	82.9338	61.9791	77.8528	78.4631	70.2718	1915.18	82.9338	111.979	177.853	228.463	270.272
1913.25	82.9762	62.1768	77.9185	78.6138	70.2608	1913.25	82.9762	112.177	177.918	228.614	270.261
1911.33	82.8571	61.9884	77.5585	78.0703	69.8071	1911.33	82.8571	111.988	177.558	228.07	269.807
1909.4	82.7366	61.7173	77.1717	77.3916	69.3471	1909.4	82.7366	111.717	177.172	227.392	269.347
1907.47	82.8764	61.9267	77.4645	77.6251	69.6913	1907.47	82.8764	111.927	177.465	227.625	269.691
1905.54	83.017	62.2503	77.8212	78.075	70.0608	1905.54	83.017	112.25	177.821	228.075	270.061
1903.61	83.0428	62.3488	77.9203	78.2359	70.1545	1903.61	83.0428	112.349	177.92	228.236	270.154
1901.68	83.0382	62.4015	77.9701	78.4136	70.2208	1901.68	83.0382	112.402	177.97	228.414	270.221
1899.75	83.0279	62.4688	78.0327	78.6676	70.331	1899.75	83.0279	112.469	178.033	228.668	270.331
1897.82	82.9577	62.4583	77.9357	78.7155	70.2365	1897.82	82.9577	112.458	177.936	228.716	270.237
1895.9	82.7561	62.1875	77.5195	78.2699	69.7693	1895.9	82.7561	112.188	177.519	228.27	269.769
1893.97	82.7519	62.1704	77.5928	78.4317	69.914	1893.97	82.7519	112.17	177.593	228.432	269.914
1892.04	82.7455	62.35	77.6867	78.7517	70.0168	1892.04	82.7455	112.35	177.687	228.752	270.017
1890.11	82.4202	61.8531	76.9566	77.8874	69.1332	1890.11	82.4202	111.853	176.957	227.887	269.133
1888.18	82.5457	61.9151	77.321	78.2815	69.643	1888.18	82.5457	111.915	177.321	228.281	269.643
1886.25	82.734	62.4469	77.8836	79.1731	70.2301	1886.25	82.734	112.447	177.884	229.173	270.23
1884.32	82.6745	62.4419	77.8216	79.1639	70.1174	1884.32	82.6745	112.442	177.822	229.164	270.117
1882.39	82.7245	62.5468	77.9545	79.3447	70.2925	1882.39	82.7245	112.547	177.954	229.345	270.292
1880.47	82.7146	62.5553	77.9083	79.252	70.2589	1880.47	82.7146	112.555	177.908	229.252	270.259
1878.54	82.7174	62.5398	77.8741	79.1371	70.2528	1878.54	82.7174	112.54	177.874	229.137	270.253
1876.61	82.7336	62.5198	77.8877	79.0746	70.3169	1876.61	82.7336	112.52	177.888	229.075	270.317
1874.68	82.7748	62.5114	77.9085	79.0454	70.3779	1874.68	82.7748	112.511	177.908	229.045	270.378
1872.75	82.7068	62.3527	77.6634	78.7384	70.132	1872.75	82.7068	112.353	177.663	228.738	270.132
1870.82	82.2765	61.714	76.5331	77.3724	68.804	1870.82	82.2765	111.714	176.533	227.372	268.804
1868.89	81.791	60.6428	75.2224	75.5559	67.4181	1868.89	81.791	110.643	175.222	225.556	267.418
1866.97	82.2112	61.1328	76.1497	76.6691	68.6744	1866.97	82.2112	111.133	176.15	226.669	268.674
1865.04	82.679	62.2026	77.3413	78.5158	70.0115	1865.04	82.679	112.203	177.341	228.516	270.012
1863.11	82.8158	62.621	77.7189	79.2287	70.3662	1863.11	82.8158	112.621	177.719	229.229	270.366
1861.18	82.7505	62.5777	77.5844	79.136	70.1848	1861.18	82.7505	112.578	177.584	229.136	270.185
1859.25	82.7578	62.608	77.594	79.2089	70.2099	1859.25	82.7578	112.608	177.594	229.209	270.21
1857.32	82.7751	62.6835	77.6427	79.3625	70.2999	1857.32	82.7751	112.684	177.643	229.363	270.3
1855.39	82.8485	62.8505	77.8027	79.6496	70.5142	1855.39	82.8485	112.85	177.803	229.65	270.514
1853.46	82.8274	62.8652	77.7373	79.6128	70.4414	1853.46	82.8274	112.865	177.737	229.613	270.441
1851.54	82.849	62.9093	77.7592	79.6421	70.4607	1851.54	82.849	112.909	177.759	229.642	270.461
1849.61	82.6604	62.6677	77.292	78.9956	69.866	1849.61	82.6604	112.668	177.292	228.996	269.866
1847.68	82.4186	62.2625	76.6728	78.0496	69.1099	1847.68	82.4186	112.262	176.673	228.05	269.11
1845.75	82.0316	61.7526	75.7605	76.9001	68.0215	1845.75	82.0316	111.753	175.76	226.9	268.021
1843.82	81.9874	61.2714	75.5469	76.365	67.8961	1843.82	81.9874	111.271	175.547	226.365	267.896
1841.89	82.6646	62.268	77.069	78.2202	69.7713	1841.89	82.6646	112.268	177.069	228.22	269.771
1839.96	82.8918	63.0496	77.7004	79.3877	70.3874	1839.96	82.8918	113.05	177.7	229.388	270.387
1838.04	82.7687	62.8714	77.4382	79.0972	70.0567	1838.04	82.7687	112.871	177.438	229.097	270.057
1836.11	82.8019	62.8806	77.4948	79.1113	70.1373	1836.11	82.8019	112.881	177.495	229.111	270.137
1834.18	82.8761	63.058	77.6724	79.342	70.3347	1834.18	82.8761	113.058	177.672	229.342	270.335
1832.25	82.6547	62.8677	77.1238	78.7155	69.6138	1832.25	82.6547	112.868	177.124	228.716	269.614
1830.32	82.1357	61.783	75.7433	76.8247	68.0581	1830.32	82.1357	111.783	175.743	226.825	268.058
1828.39	82.4401	61.9223	76.3355	77.3039	68.918	1828.39	82.4401	111.922	176.335	227.304	268.918
1826.46	82.4905	62.3996	76.5366	77.7248	69.0265	1826.46	82.4905	112.4	176.537	227.725	269.026
1824.53	82.3937	62.0878	76.2598	77.2715	68.7278	1824.53	82.3937	112.088	176.26	227.272	268.728
1822.61	82.8577	62.7985	77.2708	78.5489	69.9828	1822.61	82.8577	112.798	177.271	228.549	269.983
1820.68	82.9902	63.2181	77.5891	79.1559	70.2949	1820.68	82.9902	113.218	177.589	229.156	270.295
1818.75	82.9522	63.1611	77.4727	78.9994	70.1545	1818.75	82.9522	113.161	177.473	228.999	270.154
1816.82	82.9004	63.0527	77.3173	78.7354	69.9786	1816.82	82.9004	113.053	177.317	228.735	269.979
1814.89	83.0067	63.2196	77.5414	78.9918	70.2984	1814.89	83.0067	113.22	177.541	228.992	270.298
1812.96	82.7786	62.9484	76.9582	78.2143	69.5703	1812.96	82.7786	112.948	176.958	228.214	269.57
1811.03	82.5312	62.3784	76.2941	77.1623	68.8716	1811.03	82.5312	112.378	176.294	227.162	268.872
1809.1	82.7167	62.576	76.6205	77.4475	69.3059	1809.1	82.7167	112.576	176.62	227.447	269.306
1807.18	82.91	62.9624	77.0274	77.9251	69.7605	1807.18	82.91	112.962	177.027	227.925	269.76
1805.25	82.9456	63.135	77.1034	78.0335	69.8086	1805.25	82.9456	113.135	177.103	228.033	269.809
1803.32	82.6282	62.7033	76.3489	76.9163	68.8619	1803.32	82.6282	112.703	176.349	226.916	268.862
1801.39	82.1924	61.9484	75.3269	75.3663	67.6379	1801.39	82.1924	111.948	175.327	225.366	267.638
1799.46	82.3712	62.0593	75.7541	75.8074	68.2543	1799.46	82.3712	112.059	175.754	225.807	268.254
1797.53	82.545	62.4987	76.2078	76.4991	68.7214	1797.53	82.545	112.499	176.208	226.499	268.721
1795.6	82.3379	62.3544	75.8248	76.1528	68.2239	1795.6	82.3379	112.354	175.825	226.153	268.224
1793.68	81.9098	61.7943	74.893	75.2196	67.1136	1793.68	81.9098	111.794	174.893	225.22	267.114
1791.75	81.6775	60.988	74.323	74.297	66.6608	1791.75	81.6775	110.988	174.323	224.297	266.661
1789.82	82.3009	62.0608	75.9109	76.3883	68.6391	1789.82	82.3009	112.061	175.911	226.388	268.639
1787.89	82.5764	62.9537	76.7411	77.9347	69.5512	1787.89	82.5764	112.954	176.741	227.935	269.551
1785.96	82.2864	62.649	76.1886	77.47	68.8719	1785.96	82.2864	112.649	176.189	227.47	268.872
1784.03	82.1538	62.3275	75.9642	77.1643	68.748	1784.03	82.1538	112.327	175.964	227.164	268.748
1782.1	82.0629	62.3268	75.8188	77.1325	68.5918	1782.1	82.0629	112.327	175.819	227.133	268.592
1780.17	81.7886	61.8264	75.3102	76.4227	68.0352	1780.17	81.7886	111.826	175.31	226.423	268.035
1778.25	81.9518	62.242	75.9259	77.2208	68.7583	1778.25	81.9518	112.242	175.926	227.221	268.758
1776.32	81.7163	62.1306	75.5828	76.8595	68.2617	1776.32	81.7163	112.131	175.583	226.86	268.262
1774.39	81.2282	61.4799	74.543	75.5343	66.9763	1774.39	81.2282	111.48	174.543	225.534	266.976
1772.46	80.6412	60.2277	73.2072	73.5792	65.5392	1772.46	80.6412	110.228	173.207	223.579	265.539
1770.53	81.0145	60.6034	74.1663	74.3396	66.8311	1770.53	81.0145	110.603	174.166	224.34	266.831
1768.6	81.0651	61.2063	74.4722	74.8366	66.9928	1768.6	81.0651	111.206	174.472	224.837	266.993
1766.67	81.3483	61.6559	75.2504	75.923	67.9667	1766.67	81.3483	111.656	175.25	225.923	267.967
1764.75	81.5184	62.2421	75.7374	76.9512	68.5385	1764.75	81.5184	112.242	175.737	226.951	268.538
1762.82	80.98	61.4701	74.516	75.685	67.0923	1762.82	80.98	111.47	174.516	225.685	267.092
1760.89	80.921	61.0712	74.3901	75.4997	67.2321	1760.89	80.921	111.071	174.39	225.5	267.232
1758.96	81.0277	61.5841	74.768	76.3106	67.7194	1758.96	81.0277	111.584	174.768	226.311	267.719
1757.03	80.6356	61.1294	74.0184	75.5923	66.878	1757.03	80.6356	111.129	174.018	225.592	266.878
1755.1	80.8921	61.5211	74.7579	76.6624	67.9548	1755.1	80.8921	111.521	174.758	226.662	267.955
1753.17	80.5339	61.4389	74.0445	76.0633	67.0243	1753.17	80.5339	111.439	174.044	226.063	267.024
1751.24	79.5555	59.7438	71.8431	73.0846	64.5266	1751.24	79.5555	109.744	171.843	223.085	264.527
1749.32	79.301	58.988	71.1921	71.8951	64.0831	1749.32	79.301	108.988	171.192	221.895	264.083
1747.39	79.57	59.4361	71.8175	72.6762	64.909	1747.39	79.57	109.436	171.818	222.676	264.909
1745.46	79.7699	60.0274	72.3909	73.4465	65.5064	1745.46	79.7699	110.027	172.391	223.447	265.506
1743.53	79.5915	59.8719	72.112	73.0454	65.0999	1743.53	79.5915	109.872	172.112	223.045	265.1
1741.6	79.6667	60.0328	72.3519	73.3658	65.4054	1741.6	79.6667	110.033	172.352	223.366	265.405
1739.67	79.6197	59.8308	72.2725	73.2125	65.2912	1739.67	79.6197	109.831	172.272	223.212	265.291
1737.74	79.809	60.1105	72.7983	73.6869	65.9927	1737.74	79.809	110.11	172.798	223.687	265.993
1735.81	79.1236	59.6348	71.3601	72.2747	64.0331	1735.81	79.1236	109.635	171.36	222.275	264.033
1733.89	78.2377	57.3572	69.1528	68.9809	61.7601	1733.89	78.2377	107.357	169.153	218.981	261.76
1731.96	78.9774	58.3434	70.8042	70.9287	64.0642	1731.96	78.9774	108.343	170.804	220.929	264.064
1730.03	79.0416	58.8954	71.0627	71.717	64.3137	1730.03	79.0416	108.895	171.063	221.717	264.314
1728.1	79.4117	59.5341	71.9575	73.2829	65.5441	1728.1	79.4117	109.534	171.957	223.283	265.544
1726.17	79.5206	59.8346	72.1315	73.8445	65.8937	1726.17	79.5206	109.835	172.132	223.845	265.894
1724.24	79.2391	59.2954	71.2483	72.8609	65.0567	1724.24	79.2391	109.295	171.248	222.861	265.057
1722.31	79.0969	58.8168	70.4991	71.9233	64.5705	1722.31	79.0969	108.817	170.499	221.923	264.57
1720.39	78.6841	58.2883	69.1831	70.6591	63.2896	1720.39	78.6841	108.288	169.183	220.659	263.29
1718.46	77.3875	55.8422	65.5773	66.1893	59.5716	1718.46	77.3875	105.842	165.577	216.189	259.572
1716.53	77.1351	54.4038	63.5978	63.7065	58.7261	1716.53	77.1351	104.404	163.598	213.706	258.726
1714.6	77.5722	54.7845	62.7007	63.6481	59.3432	1714.6	77.5722	104.785	162.701	213.648	259.343
1712.67	78.0307	55.2597	61.2539	64.0696	60.0917	1712.67	78.0307	105.26	161.254	214.07	260.092
1710.74	77.9696	54.6643	57.8032	62.2168	59.0394	1710.74	77.9696	104.664	157.803	212.217	259.039
1708.81	77.6205	53.159	53.0341	58.676	56.9945	1708.81	77.6205	103.159	153.034	208.676	256.994
1706.88	76.9156	50.8091	48.3168	52.8204	53.4811	1706.88	76.9156	100.809	148.317	202.82	253.481
1704.96	76.3941	47.977	44.9189	43.8286	49.1614	1704.96	76.3941	97.977	144.919	193.829	249.161
1703.03	76.1786	46.3963	44.1451	35.1234	44.8763	1703.03	76.1786	96.3963	144.145	185.123	244.876
1701.1	74.9779	43.5803	42.2781	27.234	38.8358	1701.1	74.9779	93.5803	142.278	177.234	238.836
1699.17	74.6065	39.0861	40.088	20.3933	33.7993	1699.17	74.6065	89.0861	140.088	170.393	233.799
1697.24	74.2712	36.8576	37.9245	21.5487	32.4932	1697.24	74.2712	86.8576	137.925	171.549	232.493
1695.31	73.7159	32.7209	33.9536	27.3572	33.048	1695.31	73.7159	82.7209	133.954	177.357	233.048
1693.38	73.87	29.5831	31.2469	31.048	33.4808	1693.38	73.87	79.5831	131.247	181.048	233.481
1691.46	72.9227	26.4793	28.8396	30.2333	31.149	1691.46	72.9227	76.4793	128.84	180.233	231.149
1689.53	71.4071	22.702	26.3033	25.5383	27.3569	1689.53	71.4071	72.702	126.303	175.538	227.357
1687.6	69.9831	20.2178	24.8172	20.5359	23.92	1687.6	69.9831	70.2178	124.817	170.536	223.92
1685.67	68.2104	19.023	23.6661	16.7866	20.6821	1685.67	68.2104	69.023	123.666	166.787	220.682
1683.74	65.2996	18.827	23.0081	11.9757	17.3093	1683.74	65.2996	68.827	123.008	161.976	217.309
1681.81	63.9564	20.3449	24.2168	10.2388	16.3967	1681.81	63.9564	70.3449	124.217	160.239	216.397
1679.88	61.817	21.3746	25.0546	11.1232	15.9415	1679.88	61.817	71.3746	125.055	161.123	215.941
1677.95	59.311	22.3276	25.8463	12.4131	15.9886	1677.95	59.311	72.3276	125.846	162.413	215.989
1676.03	55.9777	22.6826	25.9189	14.7682	16.0485	1676.03	55.9777	72.6826	125.919	164.768	216.048
1674.1	51.827	23.02	26.0359	18.2961	16.9091	1674.1	51.827	73.02	126.036	168.296	216.909
1672.17	48.5778	23.1156	25.9028	22.2096	17.3515	1672.17	48.5778	73.1156	125.903	172.21	217.351
1670.24	44.7777	22.0897	24.8231	25.6372	17.197	1670.24	44.7777	72.0897	124.823	175.637	217.197
1668.31	40.134	20.8195	24.0694	30.8917	17.9426	1668.31	40.134	70.8196	124.069	180.892	217.943
1666.38	36.6412	19.7311	23.4552	35.7514	18.6034	1666.38	36.6412	69.7311	123.455	185.751	218.603
1664.45	33.5614	18.4283	22.2782	38.9273	18.6043	1664.45	33.5614	68.4283	122.278	188.927	218.604
1662.52	30.0113	16.7591	20.4833	41.4819	18.7531	1662.52	30.0113	66.7591	120.483	191.482	218.753
1660.6	27.4232	16.012	19.6119	45.2009	19.8557	1660.6	27.4232	66.012	119.612	195.201	219.856
1658.67	26.0636	15.7072	19.2626	47.8465	20.6596	1658.67	26.0636	65.7072	119.263	197.847	220.66
1656.74	25.3629	15.8368	19.4534	49.1201	21.2421	1656.74	25.3629	65.8368	119.453	199.12	221.242
1654.81	25.0745	15.8543	19.4321	47.8214	20.7144	1654.81	25.0745	65.8543	119.432	197.821	220.714
1652.88	26.0803	17.9886	22.0755	47.3381	22.5742	1652.88	26.0803	67.9886	122.076	197.338	222.574
1650.95	28.5511	21.9831	26.7044	51.8198	26.7539	1650.95	28.5511	71.9831	126.704	201.82	226.754
1649.02	30.5597	23.7691	28.4643	51.8311	27.369	1649.02	30.5597	73.7691	128.464	201.831	227.369
1647.1	33.2851	25.5721	30.4704	49.7271	28.4274	1647.1	33.2851	75.5721	130.47	199.727	228.427
1645.17	37.5348	29.3974	35.1879	51.3518	32.8329	1645.17	37.5348	79.3974	135.188	201.352	232.833
1643.24	40.5271	31.9538	38.2829	52.7024	35.4369	1643.24	40.5271	81.9538	138.283	202.702	235.437
1641.31	42.5506	33.2542	40.1192	52.1981	36.643	1641.31	42.5506	83.2542	140.119	202.198	236.643
1639.38	43.6041	33.5522	40.993	50.6796	37.0047	1639.38	43.6041	83.5522	140.993	200.68	237.005
1637.45	43.4495	32.5792	40.4647	48.0255	35.857	1637.45	43.4495	82.5792	140.465	198.025	235.857
1635.52	41.9756	30.1015	39.5149	44.7553	34.799	1635.52	41.9756	80.1015	139.515	194.755	234.799
1633.59	40.0506	27.8993	39.8801	44.1127	35.4164	1633.59	40.0506	77.8993	139.88	194.113	235.416
1631.67	37.973	25.4827	38.8709	42.565	34.1673	1631.67	37.973	75.4827	138.871	192.565	234.167
1629.74	35.1226	22.6083	36.6499	39.23	31.7582	1629.74	35.1226	72.6083	136.65	189.23	231.758
1627.81	31.7089	20.4594	33.704	34.5402	28.9016	1627.81	31.7089	70.4594	133.704	184.54	228.902
1625.88	28.7535	19.7505	31.1543	30.5355	26.4794	1625.88	28.7535	69.7505	131.154	180.535	226.479
1623.95	26.4766	19.3655	28.5819	26.99	23.864	1623.95	26.4766	69.3655	128.582	176.99	223.864
1622.02	24.389	19.3043	26.5691	24.3734	21.965	1622.02	24.389	69.3043	126.569	174.373	221.965
1620.09	23.391	19.2137	25.5188	24.273	20.7786	1620.09	23.391	69.2137	125.519	174.273	220.779
1618.17	22.7164	18.6133	24.2912	24.9071	19.3201	1618.17	22.7164	68.6133	124.291	174.907	219.32
1616.24	21.6784	17.509	23.0244	26.9205	18.0634	1616.24	21.6784	67.509	123.024	176.92	218.063
1614.31	21.1862	16.8615	22.8097	31.0193	17.8196	1614.31	21.1862	66.8615	122.81	181.019	217.82
1612.38	21.138	15.9305	22.5095	34.724	17.5359	1612.38	21.138	65.9305	122.51	184.724	217.536
1610.45	21.1185	14.8907	22.2881	38.4067	17.8231	1610.45	21.1185	64.8907	122.288	188.407	217.823
1608.52	21.005	14.0311	22.4132	41.9725	18.6946	1608.52	21.005	64.0311	122.413	191.973	218.695
1606.59	20.8462	13.9045	23.3042	45.7385	20.0547	1606.59	20.8462	63.9045	123.304	195.738	220.055
1604.66	20.5658	14.4147	24.3742	48.6893	21.036	1604.66	20.5658	64.4147	124.374	198.689	221.036
1602.74	20.4876	15.593	25.3154	50.7605	21.8258	1602.74	20.4876	65.593	125.315	200.76	221.826
1600.81	20.8186	16.8598	25.684	52.0569	22.6137	1600.81	20.8186	66.8598	125.684	202.057	222.614
1598.88	21.9473	18.1057	26.125	52.1307	23.6182	1598.88	21.9473	68.1057	126.125	202.131	223.618
1596.95	23.7053	19.3594	27.132	49.2016	24.2515	1596.95	23.7053	69.3594	127.132	199.202	224.252
1595.02	26.3372	21.3745	29.235	43.5082	24.8004	1595.02	26.3372	71.3745	129.235	193.508	224.8
1593.09	29.6135	23.9988	32.0059	40.0749	25.9929	1593.09	29.6135	73.9988	132.006	190.075	225.993
1591.16	33.4315	27.0109	35.3397	44.3753	29.0235	1591.16	33.4315	77.0109	135.34	194.375	229.024
1589.23	37.4014	30.0515	39.0714	52.1176	32.9917	1589.23	37.4014	80.0515	139.071	202.118	232.992
1587.31	41.3	33.0291	42.8421	58.0902	36.8433	1587.31	41.3	83.0291	142.842	208.09	236.843
1585.38	44.5783	35.2469	45.4969	61.253	39.7002	1585.38	44.5783	85.2469	145.497	211.253	239.7
1583.45	47.0335	36.5614	46.9136	63.2888	41.7801	1583.45	47.0335	86.5614	146.914	213.289	241.78
1581.52	48.4188	36.7985	47.0373	64.0516	42.7104	1581.52	48.4188	86.7985	147.037	214.052	242.71
1579.59	48.7287	36.1762	46.1078	62.1415	42.1555	1579.59	48.7287	86.1762	146.108	212.142	242.155
1577.66	47.9688	34.3502	43.8018	56.1393	39.3962	1577.66	47.9688	84.3502	143.802	206.139	239.396
1575.73	46.2544	31.5001	41.4259	50.5239	37.0622	1575.73	46.2544	81.5001	141.426	200.524	237.062
1573.81	44.807	29.9446	40.9389	53.5035	37.348	1573.81	44.807	79.9446	140.939	203.504	237.348
1571.88	43.4976	29.024	40.3842	57.6871	36.9734	1571.88	43.4976	79.024	140.384	207.687	236.973
1569.95	41.633	27.9613	39.1047	59.3714	35.8461	1569.95	41.633	77.9613	139.105	209.371	235.846
1568.02	40.1429	28.7084	39.4352	62.6489	36.497	1568.02	40.1429	78.7084	139.435	212.649	236.497
1566.09	39.3538	29.8404	40.1143	64.4138	36.4021	1566.09	39.3538	79.8404	140.114	214.414	236.402
1564.16	38.6955	31.3629	41.4146	65.3027	36.243	1564.16	38.6955	81.3629	141.415	215.303	236.243
1562.23	38.3797	32.6381	42.4756	65.6703	35.9506	1562.23	38.3797	82.6381	142.476	215.67	235.951
1560.3	38.0531	32.3766	41.5841	62.1839	33.842	1560.3	38.0531	82.3766	141.584	212.184	233.842
1558.38	38.5759	32.9622	43.2183	59.9642	35.2094	1558.38	38.5759	82.9622	143.218	209.964	235.209
1556.45	40.9966	36.8383	48.5069	65.7892	40.1449	1556.45	40.9966	86.8383	148.507	215.789	240.145
1554.52	42.676	38.3669	50.5285	67.0554	41.6516	1554.52	42.676	88.3669	150.529	217.055	241.652
1552.59	44.9297	40.359	53.3359	68.7612	44.3084	1552.59	44.9297	90.359	153.336	218.761	244.308
1550.66	46.5209	41.1903	54.2657	68.2765	45.0078	1550.66	46.5209	91.1903	154.266	218.277	245.008
1548.73	48.738	42.5772	56.1591	69.0536	47.0946	1548.73	48.738	92.5773	156.159	219.054	247.095
1546.8	50.3054	43.5736	57.1555	69.6849	48.0659	1546.8	50.3054	93.5736	157.156	219.685	248.066
1544.88	51.1193	42.9724	55.8506	66.6696	46.7058	1544.88	51.1193	92.9724	155.851	216.67	246.706
1542.95	51.5808	42.3704	54.7761	64.9172	45.9861	1542.95	51.5808	92.3704	154.776	214.917	245.986
1541.02	51.8146	41.5687	53.4633	63.4102	45.0607	1541.02	51.8146	91.5687	153.463	213.41	245.061
1539.09	51.5188	41.2216	53.8737	65.3903	46.3563	1539.09	51.5188	91.2216	153.874	215.39	246.356
1537.16	51.5504	42.5848	56.0308	70.174	48.6077	1537.16	51.5504	92.5848	156.031	220.174	248.608
1535.23	50.1287	41.7157	55.0539	69.9931	46.7246	1535.23	50.1287	91.7157	155.054	219.993	246.725
1533.3	47.1229	39.0902	53.2192	68.322	43.9135	1533.3	47.1229	89.0902	153.219	218.322	243.913
1531.37	43.7871	37.371	53.4236	70.6413	42.9974	1531.37	43.7871	87.371	153.424	220.641	242.997
1529.45	40.59	35.3146	52.5723	71.2613	40.6362	1529.45	40.59	85.3146	152.572	221.261	240.636
1527.52	36.0836	31.9248	50.0843	69.4843	36.4395	1527.52	36.0836	81.9248	150.084	219.484	236.439
1525.59	31.1843	28.8497	47.7827	68.6452	32.3699	1525.59	31.1843	78.8497	147.783	218.645	232.37
1523.66	27.4507	26.8252	45.7326	68.5077	29.3302	1523.66	27.4507	76.8252	145.733	218.508	229.33
1521.73	24.3773	24.6239	42.4332	66.4089	26.8372	1521.73	24.3773	74.6239	142.433	216.409	226.837
1519.8	22.1429	23.1767	40.2896	68.0855	27.781	1519.8	22.1429	73.1767	140.29	218.086	227.781
1517.87	21.4893	21.7042	38.4815	68.3772	28.7812	1517.87	21.4893	71.7042	138.481	218.377	228.781
1515.94	21.075	19.0469	36.4876	68.3453	31.406	1515.94	21.075	69.0469	136.488	218.345	231.406
1514.02	21.2781	17.9682	36.4335	71.0159	34.5138	1514.02	21.2781	67.9682	136.434	221.016	234.514
1512.09	22.1246	18.5462	36.3135	70.9095	36.0639	1512.09	22.1246	68.5462	136.314	220.909	236.064
1510.16	23.2582	20.1106	35.8232	68.5536	36.2608	1510.16	23.2582	70.1106	135.823	218.554	236.261
1508.23	24.4012	21.2527	34.3766	63.7046	34.6006	1508.23	24.4012	71.2527	134.377	213.705	234.601
1506.3	25.9734	23.5818	35.4744	64.0602	36.1042	1506.3	25.9734	73.5818	135.474	214.06	236.104
1504.37	28.1714	27.047	39.9455	71.9921	40.8166	1504.37	28.1714	77.047	139.945	221.992	240.817
1502.44	29.7058	28.3094	41.841	73.7596	41.4125	1502.44	29.7058	78.3094	141.841	223.76	241.413
1500.52	31.5089	28.9272	43.0772	72.9557	41.289	1500.52	31.5089	78.9272	143.077	222.956	241.289
1498.59	33.7138	29.4192	44.2934	71.7766	41.5678	1498.59	33.7138	79.4192	144.293	221.777	241.568
1496.66	36.4972	30.1083	45.907	71.1901	42.886	1496.66	36.4972	80.1083	145.907	221.19	242.886
1494.73	39.544	31.3843	48.2758	72.9209	45.645	1494.73	39.544	81.3843	148.276	222.921	245.645
1492.8	41.6451	32.1384	49.0103	72.6986	46.4379	1492.8	41.6451	82.1384	149.01	222.699	246.438
1490.87	42.7566	31.9829	47.4764	67.9775	44.7481	1490.87	42.7566	81.9829	147.476	217.978	244.748
1488.94	44.0688	32.6305	46.5132	62.9396	44.2685	1488.94	44.0688	82.6305	146.513	212.94	244.268
1487.01	45.552	34.0543	47.044	62.181	45.6158	1487.01	45.552	84.0543	147.044	212.181	245.616
1485.09	46.7617	35.018	47.464	64.4327	47.1099	1485.09	46.7617	85.018	147.464	214.433	247.11
1483.16	47.4066	35.3094	47.4343	68.0159	47.8447	1483.16	47.4066	85.3094	147.434	218.016	247.845
1481.23	47.767	35.2758	47.2595	70.4118	47.9577	1481.23	47.767	85.2758	147.259	220.412	247.958
1479.3	48.0905	35.7351	47.4709	72.4744	48.2797	1479.3	48.0905	85.7351	147.471	222.474	248.28
1477.37	48.0625	35.8528	46.8057	71.8611	47.2258	1477.37	48.0625	85.8528	146.806	221.861	247.226
1475.44	47.7349	35.9407	45.9982	70.1574	45.8731	1475.44	47.7349	85.9407	145.998	220.157	245.873
1473.51	47.3898	36.0296	45.3138	68.3586	44.462	1473.51	47.3898	86.0296	145.314	218.359	244.462
1471.59	47.2051	36.9844	45.7675	69.453	44.7702	1471.59	47.2051	86.9844	145.767	219.453	244.77
1469.66	47.5133	38.6359	46.9022	72.9989	45.9735	1469.66	47.5133	88.6359	146.902	222.999	245.973
1467.73	47.2696	38.9796	46.2224	73.4392	44.98	1467.73	47.2696	88.9796	146.222	223.439	244.98
1465.8	46.7323	38.4523	44.5432	71.8993	43.178	1465.8	46.7323	88.4523	144.543	221.899	243.178
1463.87	46.4045	38.1785	43.2002	71.6948	42.6246	1463.87	46.4045	88.1785	143.2	221.695	242.625
1461.94	46.5779	38.2708	42.4669	72.5515	42.8256	1461.94	46.5779	88.2708	142.467	222.551	242.826
1460.01	46.3194	37.117	40.4288	70.2319	41.2267	1460.01	46.3194	87.117	140.429	220.232	241.227
1458.08	45.6557	34.9616	37.714	65.7047	38.8625	1458.08	45.6557	84.9616	137.714	215.705	238.862
1456.16	45.442	33.9769	37.2082	65.5333	39.3756	1456.16	45.442	83.9769	137.208	215.533	239.376
1454.23	45.8635	34.8643	39.1349	69.2061	40.957	1454.23	45.8635	84.8643	139.135	219.206	240.957
1452.3	45.6017	35.055	40.4425	70.3308	40.5016	1452.3	45.6017	85.055	140.443	220.331	240.502
1450.37	45.083	35.0237	41.7536	70.4705	39.8449	1450.37	45.083	85.0237	141.754	220.47	239.845
1448.44	44.6052	34.5743	42.4288	69.381	39.1619	1448.44	44.6052	84.5743	142.429	219.381	239.162
1446.51	44.7614	34.306	43.562	69.3275	40.1211	1446.51	44.7614	84.306	143.562	219.328	240.121
1444.58	45.2635	34.0351	44.5306	69.8481	41.3772	1444.58	45.2635	84.0351	144.531	219.848	241.377
1442.66	45.6825	33.1482	44.9242	69.259	42.1843	1442.66	45.6825	83.1482	144.924	219.259	242.184
1440.73	45.9777	31.8747	45.1283	68.1939	42.7634	1440.73	45.9777	81.8747	145.128	218.194	242.763
1438.8	46.0514	30.2903	44.8057	66.0824	42.4885	1438.8	46.0514	80.2903	144.806	216.082	242.489
1436.87	45.7795	28.048	44.1364	62.4333	41.6963	1436.87	45.7795	78.048	144.136	212.433	241.696
1434.94	46.1452	26.7236	45.382	61.3411	43.2059	1434.94	46.1452	76.7236	145.382	211.341	243.206
1433.01	46.6436	26.5331	46.204	60.3519	43.5915	1433.01	46.6436	76.5331	146.204	210.352	243.592
1431.08	47.0724	26.9321	45.9965	56.8668	42.7593	1431.08	47.0724	76.9321	145.996	206.867	242.759
1429.15	47.9208	28.6722	45.4661	51.1402	41.4665	1429.15	47.9208	78.6722	145.466	201.14	241.466
1427.23	49.2133	30.986	44.9014	43.4059	39.6128	1427.23	49.2133	80.986	144.901	193.406	239.613
1425.3	50.2362	32.3622	43.203	34.1382	36.1442	1425.3	50.2362	82.3622	143.203	184.138	236.144
1423.37	51.3054	33.3676	41.4365	28.4889	33.8387	1423.37	51.3054	83.3676	141.436	178.489	233.839
1421.44	52.2113	34.3509	41.0554	30.8044	34.2305	1421.44	52.2113	84.3509	141.055	180.804	234.231
1419.51	52.2745	34.5201	41.3582	36.5975	35.2321	1419.51	52.2745	84.5201	141.358	186.598	235.232
1417.58	52.4014	35.3917	43.6115	43.7618	37.7	1417.58	52.4014	85.3917	143.612	193.762	237.7
1415.65	52.5515	36.3617	45.5825	47.7737	39.1032	1415.65	52.5515	86.3617	145.582	197.774	239.103
1413.72	52.0996	36.5044	46.235	48.1889	38.6403	1413.72	52.0996	86.5044	146.235	198.189	238.64
1411.8	51.14	35.9964	45.6919	44.9495	36.6192	1411.8	51.14	85.9964	145.692	194.95	236.619
1409.87	50.1691	35.4405	44.8379	39.6665	34.2001	1409.87	50.1691	85.4405	144.838	189.666	234.2
1407.94	49.4575	34.9002	43.9232	34.0473	31.9119	1407.94	49.4575	84.9002	143.923	184.047	231.912
1406.01	48.7593	33.9745	42.7052	29.0512	29.6212	1406.01	48.7593	83.9745	142.705	179.051	229.621
1404.08	48.2947	33.254	42.0552	26.3291	28.4276	1404.08	48.2947	83.254	142.055	176.329	228.428
1402.15	48.1167	33.1309	42.034	26.7179	28.4164	1402.15	48.1167	83.1309	142.034	176.718	228.416
1400.22	47.5668	32.5854	41.0772	27.6537	28.0012	1400.22	47.5668	82.5854	141.077	177.654	228.001
1398.3	46.806	32.1759	40.0837	28.1285	27.6787	1398.3	46.806	82.1759	140.084	178.129	227.679
1396.37	46.2622	32.3101	39.7454	28.2018	27.3839	1396.37	46.2622	82.3101	139.745	178.202	227.384
1394.44	45.5368	32.6889	40.0487	28.2513	27.1434	1394.44	45.5368	82.6889	140.049	178.251	227.143
1392.51	44.8096	33.6856	41.5325	30.5886	27.8677	1392.51	44.8096	83.6856	141.533	180.589	227.868
1390.58	43.5479	34.1124	42.4782	33.9958	28.0283	1390.58	43.5479	84.1124	142.478	183.996	228.028
1388.65	41.5048	33.7846	42.6109	37.3084	27.4933	1388.65	41.5048	83.7845	142.611	187.308	227.493
1386.72	38.7119	33.291	42.8503	41.1091	26.8946	1386.72	38.7119	83.291	142.85	191.109	226.895
1384.79	36.4027	33.3559	43.9558	45.729	27.1066	1384.79	36.4027	83.3559	143.956	195.729	227.107
1382.87	34.4913	33.1125	44.7307	49.4116	27.2189	1382.87	34.4913	83.1125	144.731	199.412	227.219
1380.94	32.8443	32.5125	45.1649	52.4133	27.7557	1380.94	32.8443	82.5125	145.165	202.413	227.756
1379.01	31.4077	31.5434	45.1003	54.7806	28.6546	1379.01	31.4077	81.5434	145.1	204.781	228.655
1377.08	30.3246	30.3402	44.6937	56.7152	29.9324	1377.08	30.3246	80.3402	144.694	206.715	229.932
1375.15	29.3684	28.6455	43.5344	57.4404	30.7928	1375.15	29.3684	78.6455	143.534	207.44	230.793
1373.22	28.7803	26.9493	42.5765	58.7926	32.4508	1373.22	28.7803	76.9493	142.576	208.793	232.451
1371.29	28.7625	25.8315	42.1164	61.0527	34.3484	1371.29	28.7625	75.8315	142.116	211.053	234.348
1369.37	29.0672	24.8123	40.9709	61.7283	35.4958	1369.37	29.0672	74.8123	140.971	211.728	235.496
1367.44	29.6435	24.348	39.918	62.5585	36.9242	1367.44	29.6435	74.348	139.918	212.558	236.924
1365.51	30.523	24.5299	39.0987	63.1111	38.0788	1365.51	30.523	74.5299	139.099	213.111	238.079
1363.58	31.3222	24.7992	37.8303	61.8103	38.1356	1363.58	31.3222	74.7992	137.83	211.81	238.136
1361.65	32.5058	25.979	37.5621	61.7299	39.2691	1361.65	32.5058	75.979	137.562	211.73	239.269
1359.72	33.8817	27.7571	38.3698	63.5052	41.1317	1359.72	33.8817	77.7571	138.37	213.505	241.132
1357.79	35.0503	29.1871	38.8402	64.1699	42.2249	1357.79	35.0503	79.1871	138.84	214.17	242.225
1355.86	35.8755	30.1951	38.842	64.0283	42.8596	1355.86	35.8755	80.1951	138.842	214.028	242.86
1353.94	36.5334	31.0238	38.798	63.9154	43.5875	1353.94	36.5334	81.0238	138.798	213.915	243.588
1352.01	37.0163	31.7339	39.0325	64.2734	44.3957	1352.01	37.0163	81.7339	139.032	214.273	244.396
1350.08	37.352	32.2618	39.7366	64.3928	44.935	1350.08	37.352	82.2618	139.737	214.393	244.935
1348.15	37.5884	32.7337	41.2622	64.3657	45.3687	1348.15	37.5884	82.7337	141.262	214.366	245.369
1346.22	37.7949	33.0806	43.3711	63.1648	45.426	1346.22	37.7949	83.0806	143.371	213.165	245.426
1344.29	37.8335	33.1062	45.4798	59.0005	44.5607	1344.29	37.8335	83.1062	145.48	209	244.561
1342.36	37.656	32.5375	46.9229	51.7097	42.4319	1342.36	37.656	82.5375	146.923	201.71	242.432
1340.43	36.9974	31.0264	47.2443	47.2439	40.0794	1340.43	36.9974	81.0264	147.244	197.244	240.079
1338.51	36.2433	29.5675	47.9856	52.0834	40.3542	1338.51	36.2433	79.5675	147.986	202.083	240.354
1336.58	35.5897	28.7575	49.258	60.1195	41.8473	1336.58	35.5897	78.7575	149.258	210.119	241.847
1334.65	34.7536	27.9604	49.8393	65.1362	42.1547	1334.65	34.7536	77.9604	149.839	215.136	242.155
1332.72	33.5556	27.0129	49.5675	67.5633	41.2042	1332.72	33.5556	77.0129	149.568	217.563	241.204
1330.79	32.0312	25.9768	48.6275	68.6725	39.4618	1330.79	32.0312	75.9768	148.627	218.672	239.462
1328.86	30.2436	24.8294	47.29	69.3361	37.3705	1328.86	30.2436	74.8294	147.29	219.336	237.37
1326.93	28.3363	23.4605	45.5815	69.7762	35.1865	1326.93	28.3363	73.4605	145.581	219.776	235.186
1325.01	26.4167	21.8703	43.5273	70.0556	33.0799	1325.01	26.4167	71.8703	143.527	220.056	233.08
1323.08	24.7114	20.1246	41.2003	70.1554	31.2283	1323.08	24.7114	70.1246	141.2	220.155	231.228
1321.15	23.3455	18.4571	38.8867	69.9491	29.756	1321.15	23.3455	68.4571	138.887	219.949	229.756
1319.22	22.4765	17.3805	37.1167	69.4523	28.9083	1319.22	22.4765	67.3805	137.117	219.452	228.908
1317.29	22.2483	17.3034	36.5861	69.5958	29.1077	1317.29	22.2483	67.3034	136.586	219.596	229.108
1315.36	22.7197	18.0248	36.9396	69.9273	30.0489	1315.36	22.7197	68.0248	136.94	219.927	230.049
1313.43	23.6843	19.2754	37.6041	69.9211	31.2939	1313.43	23.6843	69.2754	137.604	219.921	231.294
1311.5	25.1245	21.1014	38.6755	70.3134	32.9289	1311.5	25.1245	71.1014	138.675	220.313	232.929
1309.58	26.7821	23.2221	40.0287	70.7698	34.4686	1309.58	26.7821	73.2221	140.029	220.77	234.469
1307.65	28.557	25.4688	41.6199	70.7718	35.7195	1307.65	28.557	75.4688	141.62	220.772	235.719
1305.72	30.3618	27.8301	43.554	70.9336	36.9069	1305.72	30.3618	77.8301	143.554	220.934	236.907
1303.79	32.0993	30.126	45.4245	71.0182	38.0006	1303.79	32.0993	80.126	145.424	221.018	238.001
1301.86	33.6237	32.1667	46.9938	71.1042	39.0487	1301.86	33.6237	82.1667	146.994	221.104	239.049
1299.93	34.871	33.7116	48.1335	71.131	40.0379	1299.93	34.871	83.7116	148.133	221.131	240.038
1298	35.6558	34.4935	48.831	71.1326	40.8628	1298	35.6558	84.4935	148.831	221.133	240.863
1296.08	35.9557	34.3877	49.1507	71.1234	41.4721	1296.08	35.9557	84.3877	149.151	221.123	241.472
1294.15	35.8072	33.765	49.222	71.3373	41.8138	1294.15	35.8072	83.765	149.222	221.337	241.814
1292.22	35.3198	33.352	48.882	71.3398	41.6675	1292.22	35.3198	83.352	148.882	221.34	241.667
1290.29	34.6159	33.4523	48.191	71.2125	41.1053	1290.29	34.6159	83.4523	148.191	221.213	241.105
1288.36	33.9946	33.7909	47.4112	71.0154	40.3316	1288.36	33.9946	83.7909	147.411	221.015	240.332
1286.43	33.6679	34.4007	47.1299	71.2027	39.7099	1286.43	33.6679	84.4007	147.13	221.203	239.71
1284.5	33.7734	35.2262	47.4863	71.458	39.2826	1284.5	33.7734	85.2262	147.486	221.458	239.283
1282.57	34.1989	35.9022	48.2696	71.5183	38.9975	1282.57	34.1989	85.9022	148.27	221.518	238.998
1280.65	34.822	36.161	49.1819	71.4301	38.8298	1280.65	34.822	86.161	149.182	221.43	238.83
1278.72	35.3699	36.0823	49.9735	71.4654	38.6026	1278.72	35.3699	86.0823	149.973	221.465	238.603
1276.79	35.6811	36.1317	50.4022	71.5242	38.1512	1276.79	35.6811	86.1317	150.402	221.524	238.151
1274.86	35.5722	36.6755	50.3324	71.5518	37.3785	1274.86	35.5722	86.6755	150.332	221.552	237.379
1272.93	35.0224	37.5149	49.6659	71.3768	36.1832	1272.93	35.0224	87.5149	149.666	221.377	236.183
1271	34.0696	38.3032	48.7012	71.239	34.6652	1271	34.0696	88.3032	148.701	221.239	234.665
1269.07	32.9784	38.9305	47.9981	71.3126	33.1671	1269.07	32.9784	88.9305	147.998	221.313	233.167
1267.14	31.9238	39.3672	47.8784	71.4343	31.8524	1267.14	31.9238	89.3672	147.878	221.434	231.852
1265.22	31.0906	39.6626	48.2972	71.4403	30.9285	1265.22	31.0906	89.6626	148.297	221.44	230.928
1263.29	30.5118	39.7228	48.9108	71.3511	30.4992	1263.29	30.5118	89.7228	148.911	221.351	230.499
1261.36	30.2537	39.3039	49.1992	70.9178	30.5555	1261.36	30.2537	89.3039	149.199	220.918	230.556
1259.43	30.2545	38.4788	48.8673	70.5281	31.1959	1259.43	30.2545	88.4788	148.867	220.528	231.196
1257.5	30.4348	37.5753	47.5827	70.3719	32.3334	1257.5	30.4348	87.5753	147.583	220.372	232.333
1255.57	30.5178	36.7934	45.4593	70.2696	33.618	1255.57	30.5178	86.7934	145.459	220.27	233.618
1253.64	30.4264	36.1907	43.6971	70.2361	34.899	1253.64	30.4264	86.1907	143.697	220.236	234.899
1251.72	30.1045	35.6565	43.2215	70.3681	36.0499	1251.72	30.1045	85.6565	143.221	220.368	236.05
1249.79	29.6068	35.0984	43.6271	70.5724	37.0284	1249.79	29.6068	85.0984	143.627	220.572	237.028
1247.86	29.0378	34.4844	44.124	70.8467	37.8123	1247.86	29.0378	84.4844	144.124	220.847	237.812
1245.93	28.6187	33.8159	44.399	71.0694	38.377	1245.93	28.6187	83.8159	144.399	221.069	238.377
1244	28.4248	33.0343	44.5703	71.2641	38.723	1244	28.4248	83.0343	144.57	221.264	238.723
1242.07	28.5905	32.0402	44.8631	71.4283	39.0636	1242.07	28.5905	82.0402	144.863	221.428	239.064
1240.14	29.104	30.9853	45.3336	71.4585	39.6362	1240.14	29.104	80.9853	145.334	221.458	239.636
1238.21	30.0232	30.5621	45.8997	71.1908	40.6231	1238.21	30.0232	80.5622	145.9	221.191	240.623
1236.29	31.24	31.1045	46.4131	70.6167	41.9305	1236.29	31.24	81.1045	146.413	220.617	241.931
1234.36	32.6451	32.0615	46.7323	69.5705	43.3082	1234.36	32.6451	82.0615	146.732	219.571	243.308
1232.43	34.0895	33.1632	46.9359	68.5657	44.6492	1232.43	34.0895	83.1632	146.936	218.566	244.649
1230.5	35.4796	34.771	47.2054	68.3067	45.9304	1230.5	35.4796	84.771	147.205	218.307	245.93
1228.57	36.6079	36.7954	47.7816	68.9131	46.9765	1228.57	36.6079	86.7954	147.782	218.913	246.977
1226.64	37.3454	38.6791	48.7985	69.6964	47.4916	1226.64	37.3454	88.6791	148.798	219.696	247.492
1224.71	37.5631	40.1091	50.2012	70.4031	47.2897	1224.71	37.5631	90.1091	150.201	220.403	247.29
1222.79	37.2223	40.9715	51.5808	70.9516	46.2626	1222.79	37.2223	90.9715	151.581	220.952	246.263
1220.86	36.2847	41.2259	52.4465	71.353	44.5001	1220.86	36.2847	91.2259	152.447	221.353	244.5
1218.93	34.9999	40.9218	52.5287	71.5936	42.5513	1218.93	34.9999	90.9218	152.529	221.594	242.551
1217	33.5678	40.1159	51.7688	71.8157	40.9887	1217	33.5678	90.1159	151.769	221.816	240.989
1215.07	32.1473	38.6894	50.0527	71.8415	39.8994	1215.07	32.1473	88.6894	150.053	221.841	239.899
1213.14	30.8048	36.4675	47.345	71.6103	39.0698	1213.14	30.8048	86.4675	147.345	221.61	239.07
1211.21	29.7163	33.3171	43.88	71.0093	38.3667	1211.21	29.7163	83.3171	143.88	221.009	238.367
1209.28	28.9751	29.4005	40.4475	69.7098	37.6022	1209.28	28.9751	79.4005	140.447	219.71	237.602
1207.36	28.645	25.5936	38.2257	66.3033	36.3255	1207.36	28.645	75.5936	138.226	216.303	236.326
1205.43	28.4957	23.2754	37.7623	59.1193	33.9438	1205.43	28.4957	73.2754	137.762	209.119	233.944
1203.5	28.3287	23.1948	37.9216	51.2851	30.7859	1203.5	28.3287	73.1948	137.922	201.285	230.786
1201.57	28.0555	24.8224	37.9504	52.0294	28.7348	1201.57	28.0555	74.8224	137.95	202.029	228.735
1199.64	27.9861	26.9539	38.4382	59.7049	28.5888	1199.64	27.9861	76.9539	138.438	209.705	228.589
1197.71	28.4415	29.0108	39.4699	65.686	29.837	1197.71	28.4415	79.0108	139.47	215.686	229.837
1195.78	29.4318	30.936	40.565	68.6038	32.1556	1195.78	29.4318	80.936	140.565	218.604	232.156
1193.85	30.6008	32.071	41.4167	70.288	34.9082	1193.85	30.6008	82.071	141.417	220.288	234.908
1191.93	31.8754	31.2092	41.8099	71.3873	37.6668	1191.93	31.8754	81.2092	141.81	221.387	237.667
1190	33.223	28.248	41.7722	72.0923	40.2597	1190	33.223	78.248	141.772	222.092	240.26
1188.07	34.6361	26.0937	41.9436	72.5026	42.5187	1188.07	34.6361	76.0937	141.944	222.503	242.519
1186.14	35.9739	27.4555	43.3151	72.8041	44.3486	1186.14	35.9739	77.4555	143.315	222.804	244.349
1184.21	37.135	31.0536	45.9014	73.0397	45.7342	1184.21	37.135	81.0536	145.901	223.04	245.734
1182.28	38.0249	34.3925	48.703	73.1948	46.6868	1182.28	38.0249	84.3925	148.703	223.195	246.687
1180.35	38.6032	36.407	50.8176	73.2531	47.1907	1180.35	38.6032	86.407	150.818	223.253	247.191
1178.43	38.5516	36.8864	51.7055	73.2501	46.8099	1178.43	38.5516	86.8864	151.706	223.25	246.81
1176.5	37.4995	35.9683	51.1646	73.1521	44.9392	1176.5	37.4995	85.9683	151.165	223.152	244.939
1174.57	35.0782	33.8385	49.211	73.0226	41.1331	1174.57	35.0782	83.8385	149.211	223.023	241.133
1172.64	31.3364	30.6201	46.0376	72.9485	35.6621	1172.64	31.3364	80.6201	146.038	222.948	235.662
1170.71	27.1052	26.9478	41.9572	72.8914	30.2093	1170.71	27.1052	76.9478	141.957	222.891	230.209
1168.78	23.8628	24.0361	37.7576	72.7587	27.4011	1168.78	23.8628	74.0361	137.758	222.759	227.401
1166.85	22.3291	23.1299	34.9239	72.6088	28.4715	1166.85	22.3291	73.1299	134.924	222.609	228.472
1164.92	22.2075	24.6724	34.2848	72.3425	32.131	1164.92	22.2075	74.6724	134.285	222.343	232.131
1163	22.9317	27.8262	35.5459	71.9232	36.278	1163	22.9317	77.8262	135.546	221.923	236.278
1161.07	24.4331	31.4409	38.3751	71.1599	39.9814	1161.07	24.4331	81.4409	138.375	221.16	239.981
1159.14	26.7668	34.8342	42.4134	69.94	43.1495	1159.14	26.7668	84.8342	142.413	219.94	243.149
1157.21	30.0016	37.7268	46.8948	68.2222	45.8033	1157.21	30.0016	87.7268	146.895	218.222	245.803
1155.28	33.8845	39.9965	50.9238	66.6723	47.9678	1155.28	33.8845	89.9965	150.924	216.672	247.968
1153.35	38.0966	41.6514	54.0464	66.4104	49.8744	1153.35	38.0966	91.6514	154.046	216.41	249.874
1151.42	42.2383	42.9513	56.3968	67.7328	51.7255	1151.42	42.2383	92.9513	156.397	217.733	251.726
1149.5	45.9979	44.185	58.2	69.5835	53.4616	1149.5	45.9979	94.185	158.2	219.584	253.462
1147.57	49.1183	45.3761	59.5925	71.1248	54.928	1147.57	49.1183	95.3761	159.592	221.125	254.928
1145.64	51.3606	46.2659	60.5177	72.1058	55.9721	1145.64	51.3606	96.2659	160.518	222.106	255.972
1143.71	52.709	46.5769	60.9423	72.721	56.5331	1143.71	52.709	96.5769	160.942	222.721	256.533
1141.78	53.4516	46.1096	60.8403	73.0978	56.6076	1141.78	53.4516	96.1096	160.84	223.098	256.608
1139.85	53.759	45.1087	60.3211	73.3593	56.2217	1139.85	53.759	95.1087	160.321	223.359	256.222
1137.92	53.6403	44.38	59.5465	73.4619	55.3153	1137.92	53.6403	94.38	159.547	223.462	255.315
1135.99	52.9462	44.4786	58.7625	73.3771	53.7532	1135.99	52.9462	94.4786	158.762	223.377	253.753
1134.07	51.7908	45.1395	58.1655	73.0062	51.7219	1134.07	51.7908	95.1395	158.165	223.006	251.722
1132.14	50.7163	45.9602	57.9237	72.2015	50.1654	1132.14	50.7163	95.9602	157.924	222.202	250.165
1130.21	50.2877	46.7124	57.9712	70.5042	49.98	1130.21	50.2877	96.7124	157.971	220.504	249.98
1128.28	50.4678	47.3698	58.2183	67.5888	50.7372	1128.28	50.4678	97.3698	158.218	217.589	250.737
1126.35	51.005	47.9314	58.6551	64.1158	51.5063	1126.35	51.005	97.9314	158.655	214.116	251.506
1124.42	51.807	48.3813	59.3129	62.7876	52.412	1124.42	51.807	98.3813	159.313	212.788	252.412
1122.49	52.8555	48.6111	59.9495	64.8779	53.7675	1122.49	52.8555	98.6111	159.949	214.878	253.768
1120.56	53.9963	48.5607	60.2821	68.1694	55.1478	1120.56	53.9963	98.5607	160.282	218.169	255.148
1118.64	54.8298	48.2028	60.0925	70.5761	56.0464	1118.64	54.8298	98.2028	160.092	220.576	256.046
1116.71	55.028	47.4827	59.3229	71.943	56.3882	1116.71	55.028	97.4827	159.323	221.943	256.388
1114.78	54.4323	46.1998	58.0234	72.6036	56.2875	1114.78	54.4323	96.1998	158.023	222.604	256.287
1112.85	53.0622	44.438	56.3969	72.8732	55.9151	1112.85	53.0622	94.438	156.397	222.873	255.915
1110.92	51.2245	42.8548	54.8095	72.8407	55.4797	1110.92	51.2245	92.8548	154.809	222.841	255.48
1108.99	49.5067	42.4302	54.0633	72.7098	55.3007	1108.99	49.5067	92.4302	154.063	222.71	255.301
1107.06	48.6422	43.3874	54.7723	72.5999	55.6049	1107.06	48.6422	93.3874	154.772	222.6	255.605
1105.14	48.9727	45.1019	56.6663	72.6367	56.3737	1105.14	48.9727	95.1019	156.666	222.637	256.374
1103.21	50.3432	46.8596	58.7843	72.7254	57.3239	1103.21	50.3432	96.8596	158.784	222.725	257.324
1101.28	52.0576	48.116	60.2886	72.765	58.1159	1101.28	52.0576	98.116	160.289	222.765	258.116
1099.35	53.1477	48.3535	60.6425	72.636	58.4264	1099.35	53.1477	98.3535	160.642	222.636	258.426
1097.42	52.7662	47.1556	59.7725	72.3718	57.9768	1097.42	52.7662	97.1556	159.772	222.372	257.977
1095.49	50.8756	44.5398	58.401	71.9794	56.6404	1095.49	50.8756	94.5398	158.401	221.979	256.64
1093.56	48.527	41.6722	57.5772	71.6514	55.0645	1093.56	48.527	91.6722	157.577	221.651	255.064
1091.63	47.2625	40.611	57.7343	71.6126	54.5483	1091.63	47.2625	90.611	157.734	221.613	254.548
1089.71	47.6583	42.037	58.8319	72.1147	55.3939	1089.71	47.6583	92.037	158.832	222.115	255.394
1087.78	49.4491	44.6788	60.5772	73.0765	56.9032	1087.78	49.4491	94.6788	160.577	223.077	256.903
1085.85	52.2201	47.3781	62.5915	74.2324	58.6396	1085.85	52.2201	97.3781	162.591	224.232	258.64
1083.92	55.4961	49.7401	64.5566	75.265	60.3735	1083.92	55.4961	99.7401	164.557	225.265	260.373
1081.99	58.6883	51.6815	66.2778	76.0895	61.8755	1081.99	58.6883	101.682	166.278	226.09	261.876
1080.06	61.3612	53.1908	67.6542	76.6771	63.0058	1080.06	61.3612	103.191	167.654	226.677	263.006
1078.13	63.386	54.382	68.7463	77.1223	63.8258	1078.13	63.386	104.382	168.746	227.122	263.826
1076.21	64.8708	55.3193	69.6168	77.4558	64.4169	1076.21	64.8708	105.319	169.617	227.456	264.417
1074.28	65.9591	56.0888	70.3487	77.7382	64.8828	1074.28	65.9591	106.089	170.349	227.738	264.883
1072.35	66.807	56.7139	70.9796	77.9622	65.29	1072.35	66.807	106.714	170.98	227.962	265.29
1070.42	67.5051	57.2739	71.5556	78.1999	65.705	1070.42	67.5051	107.274	171.556	228.2	265.705
1068.49	68.0729	57.7621	72.0383	78.3919	66.1032	1068.49	68.0729	107.762	172.038	228.392	266.103
1066.56	68.5774	58.2105	72.4443	78.5803	66.5138	1066.56	68.5774	108.21	172.444	228.58	266.514
1064.63	69.0388	58.5896	72.7679	78.7362	66.905	1064.63	69.0388	108.59	172.768	228.736	266.905
1062.7	69.458	58.9374	73.0133	78.8734	67.2396	1062.7	69.458	108.937	173.013	228.873	267.24
1060.78	69.8567	59.2098	73.1419	78.9477	67.4625	1060.78	69.8567	109.21	173.142	228.948	267.463
1058.85	70.2658	59.4268	73.2011	79.0245	67.5998	1058.85	70.2658	109.427	173.201	229.025	267.6
1056.92	70.6529	59.5177	73.0983	79.0475	67.5855	1056.92	70.6529	109.518	173.098	229.047	267.585
1054.99	71.0035	59.4937	72.7352	79.0811	67.4214	1054.99	71.0035	109.494	172.735	229.081	267.421
1053.06	71.2992	59.2409	71.8473	79.0806	67.0603	1053.06	71.2992	109.241	171.847	229.081	267.06
1051.13	71.5443	58.7475	70.3128	79.0919	66.5112	1051.13	71.5443	108.748	170.313	229.092	266.511
1049.2	71.7317	57.9954	68.6463	79.0557	65.7311	1049.2	71.7317	107.995	168.646	229.056	265.731
1047.27	71.8825	57.0845	67.9046	78.982	64.8262	1047.27	71.8825	107.084	167.905	228.982	264.826
1045.35	71.9843	55.8781	68.1555	78.7788	64.0073	1045.35	71.9843	105.878	168.155	228.779	264.007
1043.42	72.0894	53.9595	68.7469	78.3673	63.5604	1043.42	72.0894	103.96	168.747	228.367	263.56
1041.49	72.1965	51.7928	69.4998	77.2443	63.5222	1041.49	72.1965	101.793	169.5	227.244	263.522
1039.56	72.3006	51.7733	70.5031	74.9704	63.7183	1039.56	72.3006	101.773	170.503	224.97	263.718
1037.63	72.4088	54.1551	71.4406	73.1639	64.2246	1037.63	72.4088	104.155	171.441	223.164	264.225
1035.7	72.5348	56.2062	71.6205	72.6727	64.7428	1035.7	72.5348	106.206	171.621	222.673	264.743
1033.77	72.6579	56.1852	70.522	67.8378	63.165	1033.77	72.6579	106.185	170.522	217.838	263.165
1031.85	72.8078	55.3437	68.7589	53.6307	57.743	1031.85	72.8078	105.344	168.759	203.631	257.743
1029.92	72.981	55.8503	68.0146	40.8591	52.3597	1029.92	72.981	105.85	168.015	190.859	252.36
1027.99	73.1456	57.232	68.4326	46.9616	54.1592	1027.99	73.1456	107.232	168.433	196.962	254.159
1026.06	73.2238	58.3122	68.6225	60.8963	59.5532	1026.06	73.2238	108.312	168.622	210.896	259.553
1024.13	73.1505	59.2665	69.5376	68.8446	62.8652	1024.13	73.1505	109.266	169.538	218.845	262.865
1022.2	72.7181	60.4093	71.878	72.1797	63.9214	1022.2	72.7181	110.409	171.878	222.18	263.921
1020.27	71.3725	61.2364	73.6582	73.8815	62.9147	1020.27	71.3725	111.236	173.658	223.881	262.915
1018.34	68.2757	61.4727	74.1341	75.4168	59.3969	1018.34	68.2757	111.473	174.134	225.417	259.397
1016.42	63.7271	61.0311	73.7781	76.7258	54.4266	1016.42	63.7271	111.031	173.778	226.726	254.427
1014.49	59.6184	59.7685	72.4806	77.5703	51.9782	1014.49	59.6184	109.769	172.481	227.57	251.978
1012.56	56.5897	57.8894	70.028	78.0787	53.1541	1012.56	56.5897	107.889	170.028	228.079	253.154
1010.63	54.1539	55.2982	66.7678	78.4194	55.2107	1010.63	54.1539	105.298	166.768	228.419	255.211
1008.7	53.0163	52.7251	64.315	78.6643	56.7681	1008.7	53.0163	102.725	164.315	228.664	256.768
1006.77	53.8385	51.056	63.4337	78.8552	58.272	1006.77	53.8385	101.056	163.434	228.855	258.272
1004.84	55.9655	49.7072	63.2404	78.9774	60.0513	1004.84	55.9655	99.7072	163.24	228.977	260.051
1002.92	57.817	46.9435	62.3019	79.0463	61.6966	1002.92	57.817	96.9435	162.302	229.046	261.697
1000.99	57.9604	43.2518	61.2024	79.0464	62.4836	1000.99	57.9604	93.2518	161.202	229.046	262.484
999.058	57.2844	43.368	62.2973	78.8005	62.5388	999.058	57.2844	93.368	162.297	228.801	262.539
997.129	58.2452	47.5775	65.412	78.2046	62.8209	997.129	58.2452	97.5775	165.412	228.205	262.821
995.201	61.5811	52.277	68.7951	78.0654	63.9007	995.201	61.5811	102.277	168.795	228.065	263.901
993.272	65.8864	55.9083	71.5996	78.7779	65.4361	993.272	65.8864	105.908	171.6	228.778	265.436
991.343	69.5865	58.5229	73.6191	79.4358	66.7443	991.343	69.5865	108.523	173.619	229.436	266.744
989.414	72.1214	60.333	74.9521	79.7723	67.6319	989.414	72.1214	110.333	174.952	229.772	267.632
987.486	73.6885	61.5286	75.7868	79.9587	68.2398	987.486	73.6885	111.529	175.787	229.959	268.24
985.557	74.671	62.3313	76.3406	80.1028	68.745	985.557	74.671	112.331	176.341	230.103	268.745
983.628	75.3031	62.8879	76.7012	80.2094	69.186	983.628	75.3031	112.888	176.701	230.209	269.186
981.7	75.7036	63.2948	76.9353	80.2758	69.5424	981.7	75.7036	113.295	176.935	230.276	269.542
979.771	75.9969	63.5709	77.0216	80.2902	69.8327	979.771	75.9969	113.571	177.022	230.29	269.833
977.842	76.288	63.7507	76.9769	80.2406	70.0675	977.842	76.288	113.751	176.977	230.241	270.068
975.914	76.576	63.8818	76.8831	80.0879	70.1793	975.914	76.576	113.882	176.883	230.088	270.179
973.985	76.8548	64.0455	76.8784	79.6852	70.141	973.985	76.8548	114.045	176.878	229.685	270.141
972.056	77.0886	64.1709	76.9163	78.4759	69.793	972.056	77.0886	114.171	176.916	228.476	269.793
970.128	77.2629	64.2155	76.9444	76.5661	69.171	970.128	77.2629	114.216	176.944	226.566	269.171
968.199	77.3687	64.2284	76.9553	76.5727	68.982	968.199	77.3687	114.228	176.955	226.573	268.982
966.27	77.3942	64.3936	77.0186	78.5433	69.3193	966.27	77.3942	114.394	177.019	228.543	269.319
964.342	77.3403	64.6509	77.138	79.8355	69.5431	964.342	77.3403	114.651	177.138	229.836	269.543
962.413	77.2298	64.9016	77.3342	80.3738	69.6517	962.413	77.2298	114.902	177.334	230.374	269.652
960.484	77.0655	65.0903	77.5187	80.6161	69.7664	960.484	77.0655	115.09	177.519	230.616	269.766
958.556	76.8845	65.257	77.6781	80.7806	69.9406	958.556	76.8845	115.257	177.678	230.781	269.941
956.627	76.7143	65.3825	77.7569	80.8474	70.1417	956.627	76.7143	115.383	177.757	230.847	270.142
954.698	76.5964	65.4852	77.7934	80.8996	70.3617	954.698	76.5964	115.485	177.793	230.9	270.362
952.77	76.4958	65.5243	77.7682	80.88	70.5205	952.77	76.4958	115.524	177.768	230.88	270.52
950.841	76.3703	65.5157	77.7161	80.8758	70.5814	950.841	76.3703	115.516	177.716	230.876	270.581
948.912	76.1522	65.4123	77.6037	80.8283	70.4412	948.912	76.1522	115.412	177.604	230.828	270.441
946.983	75.7252	65.195	77.4173	80.7956	69.9532	946.983	75.7252	115.195	177.417	230.796	269.953
945.055	74.9428	64.7907	77.0432	80.6607	68.9795	945.055	74.9428	114.791	177.043	230.661	268.98
943.126	73.9332	64.1952	76.4904	80.4436	67.8957	943.126	73.9332	114.195	176.49	230.444	267.896
941.197	72.9034	63.3018	75.6931	79.8576	67.1383	941.197	72.9034	113.302	175.693	229.858	267.138
939.269	71.8771	61.9491	74.6068	78.2218	66.5815	939.269	71.8771	111.949	174.607	228.222	266.581
937.34	70.6339	60.2872	73.2644	75.5311	65.8967	937.34	70.6339	110.287	173.264	225.531	265.897
935.411	69.1017	58.6694	72.0166	75.0309	65.5943	935.411	69.1017	108.669	172.017	225.031	265.594
933.483	67.6382	57.2556	71.0068	77.4346	65.9282	933.483	67.6382	107.256	171.007	227.435	265.928
931.554	66.9119	56.742	70.4998	79.4831	66.3948	931.554	66.9119	106.742	170.5	229.483	266.395
929.625	67.5443	57.7297	71.0242	80.3627	67.0117	929.625	67.5443	107.73	171.024	230.363	267.012
927.697	69.5624	59.7046	72.5362	80.7666	67.9496	927.697	69.5624	109.705	172.536	230.767	267.95
925.768	72.2119	61.7118	74.2157	80.9791	69.0174	925.768	72.2119	111.712	174.216	230.979	269.017
923.839	74.5171	63.2703	75.5793	81.0936	69.9316	923.839	74.5171	113.27	175.579	231.094	269.932
921.911	76.0493	64.3489	76.541	81.1433	70.5678	921.911	76.0493	114.349	176.541	231.143	270.568
919.982	76.9775	65.0828	77.1804	81.1765	70.9564	919.982	76.9775	115.083	177.18	231.177	270.956
918.053	77.559	65.563	77.5528	81.1706	71.1463	918.053	77.559	115.563	177.553	231.171	271.146
916.125	77.939	65.8967	77.7915	81.1869	71.1825	916.125	77.939	115.897	177.791	231.187	271.183
914.196	78.1743	66.1329	77.9323	81.2264	71.0836	914.196	78.1743	116.133	177.932	231.226	271.084
912.267	78.354	66.3266	78.0611	81.3045	70.9127	912.267	78.354	116.327	178.061	231.304	270.913
910.338	78.4828	66.4418	78.1498	81.3495	70.6975	910.338	78.4828	116.442	178.15	231.349	270.698
908.41	78.5316	66.5246	78.2062	81.3786	70.4963	908.41	78.5316	116.525	178.206	231.379	270.496
906.481	78.5062	66.5873	78.2003	81.3766	70.3345	906.481	78.5062	116.587	178.2	231.377	270.335
904.552	78.4477	66.6552	78.1748	81.3822	70.2343	904.552	78.4477	116.655	178.175	231.382	270.234
902.624	78.3272	66.6944	78.1079	81.3559	70.1889	902.624	78.3272	116.694	178.108	231.356	270.189
900.695	78.1345	66.712	78.0038	81.3206	70.2019	900.695	78.1345	116.712	178.004	231.321	270.202
898.766	77.8961	66.674	77.8496	81.2699	70.2611	898.766	77.8961	116.674	177.85	231.27	270.261
896.838	77.5794	66.613	77.6737	81.2408	70.3207	896.838	77.5794	116.613	177.674	231.241	270.321
894.909	77.1506	66.4864	77.4537	81.208	70.3315	894.909	77.1506	116.486	177.454	231.208	270.332
892.98	76.6389	66.2869	77.2161	81.205	70.2717	892.98	76.6389	116.287	177.216	231.205	270.272
891.052	75.9882	65.9572	76.9687	81.2023	70.1131	891.052	75.9882	115.957	176.969	231.202	270.113
889.123	75.1274	65.4621	76.7025	81.2234	69.8507	889.123	75.1274	115.462	176.702	231.223	269.851
887.194	74.0345	64.4795	76.3453	81.1977	69.4498	887.194	74.0345	114.48	176.345	231.198	269.45
885.266	72.8048	62.6961	75.9059	81.1764	68.9377	885.266	72.8048	112.696	175.906	231.176	268.938
883.337	71.7984	60.7838	75.4018	81.1419	68.3782	883.337	71.7984	110.784	175.402	231.142	268.378
881.408	71.3305	60.4232	74.9108	81.1136	67.8406	881.408	71.3305	110.423	174.911	231.114	267.841
879.48	71.2468	61.3625	74.3593	81.0618	67.2743	879.48	71.2468	111.362	174.359	231.062	267.274
877.551	71.3417	62.4978	73.5664	81.0204	66.7844	877.551	71.3417	112.498	173.566	231.02	266.784
875.622	71.6052	63.2231	72.1115	80.943	66.6651	875.622	71.6052	113.223	172.111	230.943	266.665
873.693	71.9094	63.3413	69.7988	80.8846	66.7296	873.693	71.9094	113.341	169.799	230.885	266.73
871.765	72.1367	63.2305	68.1461	80.8378	66.646	871.765	72.1367	113.23	168.146	230.838	266.646
869.836	72.1449	63.4669	69.2739	80.8062	66.093	869.836	72.1449	113.467	169.274	230.806	266.093
867.907	71.6045	63.9715	71.7521	80.7523	64.5082	867.907	71.6045	113.972	171.752	230.752	264.508
865.979	70.6179	64.4128	73.447	80.7115	62.2863	865.979	70.6179	114.413	173.447	230.711	262.286
864.05	70.7708	64.7147	74.2194	80.6512	62.4739	864.05	70.7708	114.715	174.219	230.651	262.474
862.121	72.2529	64.9191	74.5201	80.598	65.0541	862.121	72.2529	114.919	174.52	230.598	265.054
860.193	73.1722	64.9938	74.5701	80.5384	66.6555	860.193	73.1722	114.994	174.57	230.538	266.656
858.264	73.3276	64.9528	74.4975	80.5163	67.0289	858.264	73.3276	114.953	174.497	230.516	267.029
856.335	73.0379	64.7469	74.2281	80.4849	66.8934	856.335	73.0379	114.747	174.228	230.485	266.893
854.407	72.265	64.3031	73.6633	80.4624	66.4136	854.407	72.265	114.303	173.663	230.462	266.414
852.478	70.8326	63.4012	72.5939	80.4157	65.5629	852.478	70.8326	113.401	172.594	230.416	265.563
850.549	68.6425	61.8589	70.8665	80.3818	64.3683	850.549	68.6425	111.859	170.867	230.382	264.368
848.621	65.913	60.0044	68.6896	80.2976	62.8074	848.621	65.913	110.004	168.69	230.298	262.807
846.692	63.1864	58.8681	66.9528	80.1915	60.8926	846.692	63.1864	108.868	166.953	230.192	260.893
844.763	60.6818	58.757	65.8342	80.0156	58.6591	844.763	60.6818	108.757	165.834	230.016	258.659
842.835	59.1381	59.0303	65.0616	79.8062	57.0989	842.835	59.1381	109.03	165.062	229.806	257.099
840.906	59.4462	59.2027	65.3461	79.4967	57.345	840.906	59.4462	109.203	165.346	229.497	257.345
838.977	60.8722	59.1093	66.4896	79.0786	58.6525	838.977	60.8722	109.109	166.49	229.079	258.652
837.049	61.8438	58.6629	67.0468	78.4002	59.3549	837.049	61.8438	108.663	167.047	228.4	259.355
835.12	61.8641	57.7616	66.6781	77.1809	58.8431	835.12	61.8641	107.762	166.678	227.181	258.843
833.191	61.0736	56.2692	65.4871	74.4154	56.8852	833.191	61.0736	106.269	165.487	224.415	256.885
831.262	59.644	54.0285	63.6116	68.8283	53.2583	831.262	59.644	104.029	163.612	218.828	253.258
829.334	57.7891	51.4061	61.9777	63.5075	49.1304	829.334	57.7891	101.406	161.978	213.507	249.13
827.405	56.182	49.7937	61.8518	64.9629	47.2801	827.405	56.182	99.7937	161.852	214.963	247.28
825.476	55.3878	50.0508	62.481	70.5642	48.1949	825.476	55.3878	100.051	162.481	220.564	248.195
823.548	55.1808	51.0995	62.8267	74.4053	50.0576	823.548	55.1808	101.099	162.827	224.405	250.058
821.619	55.0218	51.5985	62.8056	76.0451	51.5232	821.619	55.0218	101.598	162.806	226.045	251.523
819.69	54.8141	51.1628	62.6597	76.6767	52.4545	819.69	54.8141	101.163	162.66	226.677	252.454
817.762	54.8725	49.5965	62.8112	76.85	53.1935	817.762	54.8725	99.5965	162.811	226.85	253.193
815.833	55.4339	46.7977	63.4711	76.7517	54.0661	815.833	55.4339	96.7977	163.471	226.752	254.066
813.904	56.3593	44.5624	64.0545	76.496	55.2306	813.904	56.3593	94.5624	164.054	226.496	255.231
811.976	57.1477	45.2197	63.984	76.1419	56.3087	811.976	57.1477	95.2197	163.984	226.142	256.309
810.047	57.5483	47.9882	63.1031	75.6926	56.9535	810.047	57.5483	97.9882	163.103	225.693	256.954
808.118	58.0551	50.9765	62.0013	75.135	57.2088	808.118	58.0551	100.977	162.001	225.135	257.209
806.19	59.2551	53.2053	61.7359	74.4811	57.1648	806.19	59.2551	103.205	161.736	224.481	257.165
804.261	60.6636	54.7558	62.3128	73.7084	56.8547	804.261	60.6636	104.756	162.313	223.708	256.855
802.332	61.5654	55.7288	62.8714	72.8043	56.3358	802.332	61.5654	105.729	162.871	222.804	256.336
800.404	61.6617	56.0561	62.662	71.7225	55.6269	800.404	61.6617	106.056	162.662	221.722	255.627
798.475	61.0041	55.7712	61.4648	70.4676	54.7612	798.475	61.0041	105.771	161.465	220.468	254.761
796.546	59.8867	54.9383	59.5357	69.1659	53.92	796.546	59.8867	104.938	159.536	219.166	253.92
794.617	58.861	53.4393	57.6013	67.9503	53.3543	794.617	58.861	103.439	157.601	217.95	253.354
792.689	58.3887	51.0038	56.8371	67.0078	53.2234	792.689	58.3887	101.004	156.837	217.008	253.223
790.76	58.5803	48.188	57.5311	66.3246	53.3669	790.76	58.5803	98.1881	157.531	216.325	253.367
788.831	59.1729	47.1929	59.3591	65.7066	53.4185	788.831	59.1729	97.1929	159.359	215.707	253.418
786.903	60.0457	47.9295	61.4799	64.9901	53.1117	786.903	60.0457	97.9295	161.48	214.99	253.112
784.974	61.5935	49.4908	63.108	64.1283	52.8233	784.974	61.5935	99.4908	163.108	214.128	252.823
783.045	63.924	51.9172	64.386	63.2561	53.2734	783.045	63.924	101.917	164.386	213.256	253.273
781.117	66.2916	54.3573	65.4106	62.4713	54.2697	781.117	66.2916	104.357	165.411	212.471	254.27
779.188	68.0045	56.2543	66.2072	61.9143	55.1785	779.188	68.0045	106.254	166.207	211.914	255.178
777.259	68.9899	57.5184	66.7768	61.725	55.8328	777.259	68.9899	107.518	166.777	211.725	255.833
775.331	69.4661	58.2559	67.1583	62.01	56.3301	775.331	69.4661	108.256	167.158	212.01	256.33
773.402	69.6657	58.631	67.4261	62.7195	56.7574	773.402	69.6657	108.631	167.426	212.72	256.757
771.473	69.723	58.7686	67.5792	63.6831	57.0783	771.473	69.723	108.769	167.579	213.683	257.078
769.545	69.7126	58.7281	67.6099	64.7556	57.2992	769.545	69.7126	108.728	167.61	214.756	257.299
767.616	69.6243	58.5244	67.5014	65.8803	57.4274	767.616	69.6243	108.524	167.501	215.88	257.427
765.687	69.5101	58.1867	67.2576	66.9993	57.5016	765.687	69.5101	108.187	167.258	216.999	257.502
763.759	69.3932	57.7256	66.8767	68.109	57.5425	763.759	69.3932	107.726	166.877	218.109	257.543
761.83	69.2757	57.1538	66.3808	69.1576	57.5584	761.83	69.2757	107.154	166.381	219.158	257.558
759.901	69.1416	56.5013	65.748	70.0996	57.5378	759.901	69.1416	106.501	165.748	220.1	257.538
757.972	69.026	55.8136	65.0162	70.9392	57.5035	757.972	69.026	105.814	165.016	220.939	257.504
756.044	68.9161	55.0996	64.1792	71.6209	57.3967	756.044	68.9161	105.1	164.179	221.621	257.397
754.115	68.817	54.4275	63.3691	72.1516	57.2367	754.115	68.817	104.428	163.369	222.152	257.237
752.186	68.6969	53.9168	62.7429	72.6031	57.0626	752.186	68.6969	103.917	162.743	222.603	257.063
750.258	68.5875	53.6174	62.455	72.9978	56.9041	750.258	68.5875	103.617	162.455	222.998	256.904
748.329	68.4859	53.488	62.5374	73.3551	56.7709	748.329	68.4859	103.488	162.537	223.355	256.771
746.4	68.3798	53.4516	62.9708	73.6365	56.6773	746.4	68.3798	103.452	162.971	223.636	256.677
744.472	68.2304	53.4864	63.638	73.82	56.6626	744.472	68.2304	103.486	163.638	223.82	256.663
742.543	68.0645	53.5826	64.4557	73.9858	56.7524	742.543	68.0645	103.583	164.456	223.986	256.752
740.614	67.8779	53.7593	65.2798	74.0652	56.8708	740.614	67.8779	103.759	165.28	224.065	256.871
738.686	67.6998	54.0477	66.0611	74.0722	56.9792	738.686	67.6998	104.048	166.061	224.072	256.979
736.757	67.4649	54.4907	66.7087	73.9632	56.988	736.757	67.4649	104.491	166.709	223.963	256.988
734.828	67.1418	55.1474	67.2003	73.7135	56.8804	734.828	67.1418	105.147	167.2	223.713	256.88
732.9	66.6756	55.9688	67.4308	73.3515	56.6744	732.9	66.6756	105.969	167.431	223.351	256.674
730.971	66.0985	56.8007	67.4354	72.909	56.3396	730.971	66.0985	106.801	167.435	222.909	256.34
729.042	65.4079	57.3755	67.3245	72.4507	55.9437	729.042	65.4079	107.376	167.325	222.451	255.944
727.114	64.7216	57.2806	67.1683	72.026	55.5142	727.114	64.7216	107.281	167.168	222.026	255.514
725.185	64.2051	56.9011	66.9786	71.6454	54.987	725.185	64.2051	106.901	166.979	221.645	254.987
723.256	63.886	57.2402	66.7543	71.3182	54.4329	723.256	63.886	107.24	166.754	221.318	254.433
721.328	63.5586	57.4975	66.3458	70.9753	54.266	721.328	63.5586	107.497	166.346	220.975	254.266
719.399	63.8897	57.6352	66.1526	70.7272	54.7715	719.399	63.8897	107.635	166.153	220.727	254.771
717.47	64.7329	57.9355	66.2515	70.5946	55.2783	717.47	64.7329	107.935	166.251	220.595	255.278
715.541	65.0399	57.726	65.9942	70.1621	55.2304	715.541	65.0399	107.726	165.994	220.162	255.23
713.613	64.9842	57.4614	65.2738	69.243	54.5875	713.613	64.9842	107.461	165.274	219.243	254.587
711.684	64.4624	56.9438	63.9996	67.5065	53.2635	711.684	64.4624	106.944	164	217.507	253.264
709.755	63.1598	55.7289	62.0655	64.1582	51.0333	709.755	63.1598	105.729	162.066	214.158	251.033
707.827	61.0308	53.5336	59.6202	57.9752	47.7507	707.827	61.0308	103.534	159.62	207.975	247.751
705.898	59.1124	50.8254	57.3628	48.8754	43.8913	705.898	59.1124	100.825	157.363	198.875	243.891
703.969	58.9821	49.2119	55.9135	40.841	41.1995	703.969	58.9821	99.2119	155.914	190.841	241.2
702.041	61.1224	49.2772	54.6467	40.5531	41.8636	702.041	61.1224	99.2772	154.647	190.553	241.864
700.112	63.5899	49.2522	53.1245	47.7717	45.0372	700.112	63.5899	99.2522	153.124	197.772	245.037
698.183	64.7639	50.0135	53.2713	56.4474	48.4132	698.183	64.7639	100.013	153.271	206.447	248.413
696.255	64.7751	52.2594	55.7611	62.9215	50.9865	696.255	64.7751	102.259	155.761	212.922	250.987
694.326	64.1541	54.3386	58.8274	67.1728	52.7793	694.326	64.1541	104.339	158.827	217.173	252.779
692.397	63.2237	54.9546	61.1171	69.8745	54.0038	692.397	63.2237	104.955	161.117	219.875	254.004
690.469	62.4963	54.8779	62.6973	71.5207	54.8518	690.469	62.4963	104.878	162.697	221.521	254.852
688.54	62.357	55.4973	63.9132	72.5253	55.4214	688.54	62.357	105.497	163.913	222.525	255.421
686.611	62.6379	56.7797	64.9927	73.3648	55.6908	686.611	62.6379	106.78	164.993	223.365	255.691
684.683	62.8498	57.7269	65.7731	73.9042	55.5926	684.683	62.8498	107.727	165.773	223.904	255.593
682.754	63.0668	58.347	66.3576	74.2283	55.4978	682.754	63.0668	108.347	166.358	224.228	255.498
680.825	63.2026	58.6485	66.6816	74.2975	55.4849	680.825	63.2026	108.648	166.682	224.297	255.485
678.896	63.3052	58.9323	66.9028	74.2416	55.5756	678.896	63.3052	108.932	166.903	224.242	255.576
676.968	63.4431	59.2591	67.1151	74.1673	55.775	676.968	63.4431	109.259	167.115	224.167	255.775
675.039	63.6527	59.6359	67.273	74.0319	55.9753	675.039	63.6527	109.636	167.273	224.032	255.975
673.11	63.7936	59.8884	67.2897	73.6754	56.0506	673.11	63.7936	109.888	167.29	223.675	256.051
671.182	62.9853	58.8086	66.6402	72.9767	55.8903	671.182	62.9853	108.809	166.64	222.977	255.89
669.253	59.9238	54.9526	64.8889	72.1507	55.7917	669.253	59.9238	104.953	164.889	222.151	255.792
667.324	61.203	57.1621	66.1864	72.9156	57.394	667.324	61.203	107.162	166.186	222.916	257.394
665.396	64.4176	61.1467	67.6023	72.6414	57.1326	665.396	64.4176	111.147	167.602	222.641	257.133
663.467	64.4302	61.073	67.1708	71.9579	56.6244	663.467	64.4302	111.073	167.171	221.958	256.624
661.538	63.907	60.4488	66.6211	71.454	56.4353	661.538	63.907	110.449	166.621	221.454	256.435
659.61	63.4429	59.8198	65.9354	70.8204	55.9506	659.61	63.4429	109.82	165.935	220.82	255.951
657.681	63.1475	59.1912	64.9996	70.1636	55.5096	657.681	63.1475	109.191	165	220.164	255.51
655.752	63.0525	58.5164	64.0379	69.3597	55.1403	655.752	63.0525	108.516	164.038	219.36	255.14
653.824	62.9928	57.4752	63.7943	68.1475	54.5852	653.824	62.9928	107.475	163.794	218.147	254.585
651.895	62.7042	55.6875	63.5755	66.6058	53.7024	651.895	62.7042	105.688	163.576	216.606	253.702
649.966	62.1166	53.8677	62.4971	64.7956	52.5555	649.966	62.1166	103.868	162.497	214.796	252.556
648.038	61.2898	52.7738	60.2929	61.6055	50.6857	648.038	61.2898	102.774	160.293	211.605	250.686
646.109	60.2177	52.1737	57.7714	56.6376	48.0826	646.109	60.2177	102.174	157.771	206.638	248.083
644.18	58.3525	51.1583	55.6176	57.1572	46.7856	644.18	58.3525	101.158	155.618	207.157	246.786
642.252	55.9091	49.8164	53.9694	62.1559	46.7004	642.252	55.9091	99.8164	153.969	212.156	246.7
640.323	53.6701	48.351	52.5943	63.62	46.1531	640.323	53.6701	98.351	152.594	213.62	246.153
638.394	52.9977	47.2276	52.2478	62.7374	46.3218	638.394	52.9977	97.2276	152.248	212.737	246.322
636.465	54.2419	46.5327	53.4031	60.8296	47.5219	636.465	54.2419	96.5327	153.403	210.83	247.522
634.537	56.5967	47.4936	55.654	58.3519	48.9381	634.537	56.5967	97.4936	155.654	208.352	248.938
632.608	59.0575	50.5426	57.9668	55.2688	49.6937	632.608	59.0575	100.543	157.967	205.269	249.694
630.679	61.1084	53.4952	59.4002	51.003	49.3708	630.679	61.1084	103.495	159.4	201.003	249.371
628.751	62.4295	55.1299	59.5928	44.4559	47.7099	628.751	62.4295	105.13	159.593	194.456	247.71
626.822	63.0104	55.9195	59.4426	36.9966	45.1358	626.822	63.0104	105.92	159.443	186.997	245.136
624.893	63.3112	56.6361	59.9426	34.7099	44.2559	624.893	63.3112	106.636	159.943	184.71	244.256
622.965	63.5512	57.4001	60.6883	37.7941	45.616	622.965	63.5512	107.4	160.688	187.794	245.616
621.036	63.6028	58.0317	61.397	40.4287	46.6779	621.036	63.6028	108.032	161.397	190.429	246.678
619.107	63.339	58.2342	62.0743	44.745	48.3737	619.107	63.339	108.234	162.074	194.745	248.374
617.179	63.0933	58.3889	62.6002	47.1683	49.7034	617.179	63.0933	108.389	162.6	197.168	249.703
615.25	63.4234	59.2734	63.2849	45.6548	49.7133	615.25	63.4234	109.273	163.285	195.655	249.713
613.321	63.4723	59.8266	63.8385	42.6655	49.0901	613.321	63.4723	109.827	163.838	192.665	249.09
611.393	62.924	59.8982	64.1362	39.7066	48.1341	611.393	62.924	109.898	164.136	189.707	248.134
609.464	61.9279	59.6806	64.1307	37.2063	46.8157	609.464	61.9279	109.681	164.131	187.206	246.816
607.535	60.0866	59.1881	63.6953	35.6246	45.049	607.535	60.0866	109.188	163.695	185.625	245.049
605.607	57.6525	58.3688	62.923	34.8844	43.0408	605.607	57.6525	108.369	162.923	184.884	243.041
603.678	55.7198	57.2374	61.9885	35.0311	42.0151	603.678	55.7198	107.237	161.989	185.031	242.015
601.749	54.5553	55.8071	60.9259	35.7424	42.2928	601.749	54.5553	105.807	160.926	185.742	242.293
599.82	54.3437	54.4904	59.9678	37.0285	43.2172	599.82	54.3437	104.49	159.968	187.028	243.217
597.892	54.7946	54.3555	59.7286	38.8806	44.5418	597.892	54.7946	104.355	159.729	188.881	244.542
595.963	55.8166	55.3022	59.778	40.9335	45.9255	595.963	55.8166	105.302	159.778	190.933	245.925
594.034	57.2919	56.4079	59.9474	42.8421	47.1923	594.034	57.2919	106.408	159.947	192.842	247.192
592.106	58.8328	57.3591	60.6372	44.6646	48.3279	592.106	58.8328	107.359	160.637	194.665	248.328
590.177	60.4812	58.5756	62.0725	46.9605	49.9053	590.177	60.4812	108.576	162.072	196.96	249.905
588.248	61.74	59.4665	63.1032	49.2314	51.322	588.248	61.74	109.466	163.103	199.231	251.322
586.32	62.3072	59.7206	63.3229	50.9068	52.1893	586.32	62.3072	109.721	163.323	200.907	252.189
584.391	62.733	59.8735	63.3253	52.4902	52.9603	584.391	62.733	109.873	163.325	202.49	252.96
582.462	63.0335	59.9789	63.2676	54.0765	53.6544	582.462	63.0335	109.979	163.268	204.076	253.654
580.534	62.9864	59.9361	63.0873	55.5032	54.0434	580.534	62.9864	109.936	163.087	205.503	254.043
578.605	62.8634	59.9223	63.0013	57.0156	54.4476	578.605	62.8634	109.922	163.001	207.016	254.448
576.676	62.6098	59.584	62.5313	58.0554	54.4293	576.676	62.6098	109.584	162.531	208.055	254.429
574.748	62.4946	59.4126	62.2515	59.506	54.8453	574.748	62.4946	109.413	162.252	209.506	254.845
572.819	62.7252	59.3613	62.1353	61.1171	55.4895	572.819	62.7252	109.361	162.135	211.117	255.49
570.89	62.8865	59.0606	61.6712	62.1398	55.6636	570.89	62.8865	109.061	161.671	212.14	255.664
568.962	62.9649	59.0024	61.2649	63.2299	55.8124	568.962	62.9649	109.002	161.265	213.23	255.812
567.033	63.1934	59.2481	61.3347	64.6028	56.2326	567.033	63.1934	109.248	161.335	214.603	256.233
565.104	63.4123	59.4759	61.843	66.0167	56.7838	565.104	63.4123	109.476	161.843	216.017	256.784
563.175	63.4969	59.433	62.2202	67.0537	57.2002	563.175	63.4969	109.433	162.22	217.054	257.2
561.247	63.5718	59.3559	62.5143	67.9629	57.6114	561.247	63.5718	109.356	162.514	217.963	257.611
559.318	63.5765	59.1737	62.6342	68.6477	57.9837	559.318	63.5765	109.174	162.634	218.648	257.984
557.389	63.5706	58.8976	62.5598	69.2033	58.3456	557.389	63.5706	108.898	162.56	219.203	258.346
555.461	63.5698	58.5753	62.2755	69.6177	58.6658	555.461	63.5698	108.575	162.276	219.618	258.666
553.532	63.7018	58.3814	62.2027	70.0784	59.0427	553.532	63.7018	108.381	162.203	220.078	259.043
551.603	63.9195	58.1005	62.4832	70.2963	59.2984	551.603	63.9195	108.1	162.483	220.296	259.298
549.675	64.2182	57.7791	62.9358	70.4512	59.4324	549.675	64.2182	107.779	162.936	220.451	259.432
547.746	64.4494	57.4203	63.2727	70.8616	59.5321	547.746	64.4494	107.42	163.273	220.862	259.532
545.817	64.6317	57.0257	63.495	71.4124	59.5477	545.817	64.6317	107.026	163.495	221.412	259.548
543.889	64.7353	56.7598	63.8548	72.292	59.7183	543.889	64.7353	106.76	163.855	222.292	259.718
541.96	64.7611	56.4032	64.0552	72.9096	59.6697	541.96	64.7611	106.403	164.055	222.91	259.67
540.031	64.8098	55.9806	64.1249	73.2439	59.4676	540.031	64.8098	105.981	164.125	223.244	259.468
538.103	64.8839	55.6675	64.2539	73.4913	59.3488	538.103	64.8839	105.667	164.254	223.491	259.349
536.174	64.7487	55.3563	64.3459	73.6261	59.2812	536.174	64.7487	105.356	164.346	223.626	259.281
534.245	64.7256	55.1052	64.4482	73.7842	59.3301	534.245	64.7256	105.105	164.448	223.784	259.33
532.317	64.6858	54.9165	64.5738	73.8703	59.4933	532.317	64.6858	104.917	164.574	223.87	259.493
530.388	64.4635	54.6272	64.5524	73.7738	59.5696	530.388	64.4635	104.627	164.552	223.774	259.57
528.459	64.0809	53.9798	64.1062	73.167	59.2581	528.459	64.0809	103.98	164.106	223.167	259.258
526.531	63.2138	52.7844	63.0752	71.75	58.3385	526.531	63.2138	102.784	163.075	221.75	258.339
524.602	62.543	51.963	62.7859	71.5623	58.4561	524.602	62.543	101.963	162.786	221.562	258.456
522.673	62.0512	51.733	62.8498	71.7269	58.8025	522.673	62.0512	101.733	162.85	221.727	258.802
520.744	61.8394	51.7214	62.4841	70.2722	58.1535	520.744	61.8394	101.721	162.484	220.272	258.154
518.816	62.2541	51.8125	62.2	67.9929	57.199	518.816	62.2541	101.812	162.2	217.993	257.199
516.887	63.0637	52.0544	62.5941	66.3917	56.8606	516.887	63.0637	102.054	162.594	216.392	256.861
514.958	63.9736	52.6967	63.662	66.0111	57.2115	514.958	63.9736	102.697	163.662	216.011	257.212
513.03	64.6788	53.1508	64.3015	65.8281	57.2949	513.03	64.6788	103.151	164.301	215.828	257.295
511.101	64.9518	53.3128	64.3375	66.1184	57.1406	511.101	64.9518	103.313	164.337	216.118	257.141
509.172	65.1196	53.5118	64.3344	67.4136	57.3059	509.172	65.1196	103.512	164.334	217.414	257.306
507.244	65.1457	53.6388	64.2261	69.0602	57.6437	507.244	65.1457	103.639	164.226	219.06	257.644
505.315	65.2165	54.0003	64.3889	70.8983	58.2984	505.315	65.2165	104	164.389	220.898	258.298
503.386	65.0487	54.1226	64.1586	71.6809	58.3642	503.386	65.0487	104.123	164.159	221.681	258.364
501.458	64.9107	54.3504	64.184	72.5198	58.831	501.458	64.9107	104.35	164.184	222.52	258.831
499.529	65.061	55.1984	65.1079	74.6333	60.2934	499.529	65.061	105.198	165.108	224.633	260.293
497.6	64.9829	55.6772	65.3498	75.5986	60.8458	497.6	64.9829	105.677	165.35	225.599	260.846
495.672	64.8057	56.0523	65.376	76.0845	61.0172	495.672	64.8057	106.052	165.376	226.085	261.017
493.743	64.4381	56.3164	65.2906	75.9988	60.7243	493.743	64.4381	106.316	165.291	225.999	260.724
491.814	64.2105	56.6863	65.4975	75.8751	60.3793	491.814	64.2105	106.686	165.497	225.875	260.379
489.886	64.4475	57.5626	66.6343	76.8236	60.803	489.886	64.4475	107.563	166.634	226.824	260.803
487.957	64.6644	58.324	67.5307	77.4063	61.0055	487.957	64.6644	108.324	167.531	227.406	261.005
486.028	64.9932	58.7199	67.7082	76.9204	60.6381	486.028	64.9932	108.72	167.708	226.92	260.638
484.099	65.3931	59.2892	68.132	76.9081	60.7289	484.099	65.3931	109.289	168.132	226.908	260.729
482.171	65.8762	60.1056	68.9165	77.4892	61.3138	482.171	65.8762	110.106	168.917	227.489	261.314
480.242	66.2761	60.7458	69.5837	78.0285	61.934	480.242	66.2761	110.746	169.584	228.028	261.934
478.313	66.4328	61.1144	69.7874	77.9703	62.1616	478.313	66.4328	111.114	169.787	227.97	262.162
476.385	66.5449	61.2805	69.7861	77.6689	62.2521	476.385	66.5449	111.28	169.786	227.669	262.252
474.456	66.508	61.0541	69.5262	76.8704	62.086	474.456	66.508	111.054	169.526	226.87	262.086
472.527	66.2361	60.5586	68.8689	75.5507	61.6925	472.527	66.2361	110.559	168.869	225.551	261.692
470.599	66.3844	61.208	69.4457	76.4163	62.7425	470.599	66.3844	111.208	169.446	226.416	262.743
468.67	66.2624	61.4683	69.5497	76.7782	63.0471	468.67	66.2624	111.468	169.55	226.778	263.047
466.741	66.1701	61.5426	69.6218	77.4639	63.524	466.741	66.1701	111.543	169.622	227.464	263.524
464.813	66.2452	61.7239	70.0044	78.6831	64.158	464.813	66.2452	111.724	170.004	228.683	264.158
462.884	65.8861	61.1578	69.6737	78.2366	63.4644	462.884	65.8861	111.158	169.674	228.237	263.464
460.955	65.6404	60.927	69.4145	77.5757	62.6364	460.955	65.6404	110.927	169.414	227.576	262.636
459.027	65.444	60.8157	68.7896	76.1066	61.4094	459.027	65.444	110.816	168.79	226.107	261.409
457.098	65.5855	61.1084	68.6193	75.2369	60.8262	457.098	65.5855	111.108	168.619	225.237	260.826
455.169	66.2833	62.2038	69.9064	77.0489	62.2008	455.169	66.2833	112.204	169.906	227.049	262.201
453.241	66.3599	61.9527	69.9004	76.8558	62.1026	453.241	66.3599	111.953	169.9	226.856	262.103
451.312	66.514	61.9073	70.1003	77.1271	62.563	451.312	66.514	111.907	170.1	227.127	262.563
449.383	66.8503	62.4112	70.4365	77.62	63.2847	449.383	66.8503	112.411	170.437	227.62	263.285
447.455	66.8105	62.3605	69.8061	76.2361	62.7779	447.455	66.8105	112.361	169.806	226.236	262.778
445.526	67.097	62.7595	69.8764	75.8189	63.1427	445.526	67.097	112.76	169.876	225.819	263.143
443.597	67.6855	63.3217	70.184	75.9495	63.906	443.597	67.6855	113.322	170.184	225.949	263.906
441.668	68.3657	64.1899	70.8561	76.8691	64.9974	441.668	68.3657	114.19	170.856	226.869	264.997
439.74	68.8382	65.183	71.7631	78.2045	66.1965	439.74	68.8382	115.183	171.763	228.204	266.197
437.811	68.7669	65.2443	71.5462	77.7349	65.7461	437.811	68.7669	115.244	171.546	227.735	265.746
435.882	68.5751	64.9632	70.8756	76.7112	64.6405	435.882	68.5751	114.963	170.876	226.711	264.64
433.954	69.0877	65.5518	71.4203	77.469	64.9068	433.954	69.0877	115.552	171.42	227.469	264.907
432.025	69.3839	65.9532	71.7	77.9278	65.0749	432.025	69.3839	115.953	171.7	227.928	265.075
430.096	69.6051	66.1426	71.5665	77.8479	64.9596	430.096	69.6051	116.143	171.567	227.848	264.96
428.168	69.7519	66.2079	71.2039	77.5305	64.688	428.168	69.7519	116.208	171.204	227.53	264.688
426.239	69.5473	65.6986	70.0479	76.1946	63.6032	426.239	69.5473	115.699	170.048	226.195	263.603
424.31	69.1952	64.8811	68.5536	74.4294	62.4535	424.31	69.1952	114.881	168.554	224.429	262.454
422.382	68.8378	64.4709	67.5135	73.4948	62.0156	422.382	68.8378	114.471	167.513	223.495	262.016
420.453	67.8998	62.8944	65.3632	70.5999	59.9804	420.453	67.8998	112.894	165.363	220.6	259.98
418.524	66.6389	60.9229	62.7739	66.097	57.1281	418.524	66.6389	110.923	162.774	216.097	257.128
416.596	67.5734	63.607	66.0655	68.7666	60.1614	416.596	67.5734	113.607	166.065	218.767	260.161
414.667	68.1265	65.0453	68.149	68.0329	61.1912	414.667	68.1265	115.045	168.149	218.033	261.191
412.738	67.8133	64.5763	67.9272	64.3808	60.1227	412.738	67.8133	114.576	167.927	214.381	260.123
410.81	67.2502	63.8366	67.9695	65.983	60.1589	410.81	67.2502	113.837	167.969	215.983	260.159
408.881	66.6033	62.8397	67.7971	70.3165	60.4975	408.881	66.6033	112.84	167.797	220.317	260.498
406.952	66.4471	61.8502	67.4132	72.6	60.4255	406.952	66.4471	111.85	167.413	222.6	260.426
405.023	66.7384	61.8726	67.5306	73.3468	60.7899	405.023	66.7384	111.873	167.531	223.347	260.79
403.095	67.1814	62.436	67.4689	72.9974	60.876	403.095	67.1814	112.436	167.469	222.997	260.876
401.166	68.1421	62.0754	66.6164	70.5537	59.4245	401.166	68.1421	112.075	166.616	220.554	259.424
399.237	69.5051	60.8052	65.0403	66.0426	56.7681	399.237	69.5051	110.805	165.04	216.043	256.768
